# Supplementary material for: Fecal Microbiome Data Distinguish Liver Recipients With Normal and Abnormal Liver Function From Healthy Controls
Source: Front Microbiol. 2019 Jul 3;10:1518. doi: 10.3389/fmicb.2019.01518 (PMC6619441; doi:10.3389/fmicb.2019.01518)
Supplement: Supplementary file 2 [file Data_Sheet_2.xlsx]

## Sheet: otu_table for each sample
SUPPLEMENTARY DATASET S1_ A Annotation of all OTU which detected by 16s rDNA sequencing.
OTU ID	taxonomy	HC_1	HC_10	HC_11	HC_12	HC_13	HC_14	HC_15	HC_16	HC_17	HC_18	HC_19	HC_2	HC_20	HC_21	HC_22	HC_23	HC_24	HC_25	HC_26	HC_27	HC_28	HC_29	HC_3	HC_30	HC_31	HC_32	HC_33	HC_34	HC_35	HC_36	HC_37	HC_38	HC_39	HC_4	HC_40	HC_41	HC_42	HC_43	HC_44	HC_45	HC_46	HC_47	HC_48	HC_49	HC_5	HC_50	HC_51	HC_52
OTU47	d__Bacteria; p__Verrucomicrobia; c__Verrucomicrobiae; o__Verrucomicrobiales; f__Verrucomicrobiaceae; g__Akkermansia	2	3	1	0	0	0	558	42	0	9	1	0	25	466	2	0	0	12	0	0	0	1	1	0	273	0	2	0	0	1	1077	0	0	0	0	4	0	0	0	0	0	0	8	0	1	0	2	8
OTU506	d__Bacteria; p__Verrucomicrobia; c__Opitutae; o__Puniceicoccales; f__Puniceicoccaceae	0	0	0	0	0	0	0	0	0	0	17	0	0	0	0	0	17	0	0	0	1	0	0	0	33	0	0	0	0	0	0	0	0	0	0	0	0	0	0	0	0	0	0	0	0	0	0	2
OTU357	d__Bacteria; p__Synergistetes; c__Synergistia; o__Synergistales; f__Synergistaceae; g__Pyramidobacter	0	0	0	0	0	0	0	0	0	4	0	0	0	0	0	0	0	0	0	0	0	0	0	0	0	3	0	0	0	0	0	0	0	0	0	0	0	0	0	0	0	0	0	0	0	0	0	0
OTU227	d__Bacteria; p__Synergistetes; c__Synergistia; o__Synergistales; f__Synergistaceae; g__Cloacibacillus	0	0	0	83	0	0	0	0	0	4	8	54	0	0	0	0	4	0	0	0	2	0	0	2	17	0	0	1	0	0	0	0	0	0	1	3	0	0	0	94	0	0	0	0	1	0	0	0
OTU366	d__Bacteria; p__Synergistetes; c__Synergistia; o__Synergistales; f__Synergistaceae; g__Cloacibacillus	0	0	0	19	0	0	0	1	0	0	0	2	0	0	0	0	1	0	0	1	0	0	0	0	7	0	0	0	0	0	0	0	0	0	0	0	0	0	0	22	0	0	0	0	0	0	0	0
OTU393	d__Bacteria; p__Synergistetes; c__Synergistia; o__Synergistales; f__Synergistaceae; g__Cloacibacillus	0	0	0	0	0	0	0	0	0	0	0	0	0	0	0	0	0	0	0	0	0	0	0	0	0	0	0	0	0	0	0	0	0	0	0	2	0	0	0	0	0	0	0	0	0	0	0	0
OTU484	d__Bacteria; p__Proteobacteria; c__Gammaproteobacteria; o__Pseudomonadales; f__Pseudomonadaceae; g__Pseudomonas	0	0	1	1	0	0	0	0	0	0	0	0	13	0	0	0	0	0	0	0	0	0	0	1	0	0	0	0	0	0	0	0	0	1	0	0	0	0	0	0	0	0	0	0	0	0	0	0
OTU85	d__Bacteria; p__Proteobacteria; c__Gammaproteobacteria; o__Pasteurellales; f__Pasteurellaceae; g__Haemophilus	6	2	1	1	129	5	128	1	1	99	151	2	6	18	30	36	0	14	5	1	140	2	5	0	0	10	52	1	135	12	0	39	12	0	11	2	13	1	117	8	147	21	13	7	0	451	13	8
OTU454	d__Bacteria; p__Proteobacteria; c__Gammaproteobacteria; o__Pasteurellales; f__Pasteurellaceae	0	0	0	0	4	0	0	0	0	0	0	0	0	0	0	0	0	1	0	0	3	0	0	0	0	0	0	0	0	0	0	0	0	0	0	0	1	0	0	0	3	0	0	0	0	3	0	0
OTU402	d__Bacteria; p__Proteobacteria; c__Gammaproteobacteria; o__Enterobacteriales; f__Enterobacteriaceae; g__Raoultella	0	0	0	0	0	4	0	0	0	0	0	9	2	0	0	0	0	0	0	0	10	0	0	0	1	0	0	0	0	0	0	0	0	0	0	0	25	0	0	1	0	0	0	0	0	0	0	0
OTU211	d__Bacteria; p__Proteobacteria; c__Gammaproteobacteria; o__Enterobacteriales; f__Enterobacteriaceae; g__Plesiomonas	0	0	0	0	0	0	0	0	0	0	0	0	0	0	0	0	0	0	0	0	0	0	0	0	0	0	0	0	0	0	0	0	0	0	0	0	0	0	0	0	0	0	0	0	0	0	0	0
OTU501	d__Bacteria; p__Proteobacteria; c__Gammaproteobacteria; o__Enterobacteriales; f__Enterobacteriaceae; g__Morganella	0	0	0	0	0	0	0	0	0	0	0	1	8	0	0	0	0	0	1	0	0	0	0	0	0	1	0	0	0	0	0	0	0	0	0	0	0	0	0	0	0	0	0	1	0	0	0	0
OTU56	d__Bacteria; p__Proteobacteria; c__Gammaproteobacteria; o__Enterobacteriales; f__Enterobacteriaceae; g__Klebsiella	0	20	4	0	14	24	4	0	0	0	4	178	31	0	0	0	0	18	1	0	54	0	19	0	1	0	4	126	0	0	0	0	0	0	17	9	78	4	0	1	11	1	35	4	0	5	0	0
OTU3	d__Bacteria; p__Proteobacteria; c__Gammaproteobacteria; o__Enterobacteriales; f__Enterobacteriaceae; g__Escherichia/Shigella	0	174	638	586	1	884	22	67	55	18	3	158	1183	844	23	135	31	20	110	34	283	0	12	8	225	868	47	4	668	113	2	10	3	1278	3	7	284	882	27	919	8	100	15	1028	20	219	1	6
OTU444	d__Bacteria; p__Proteobacteria; c__Gammaproteobacteria; o__Enterobacteriales; f__Enterobacteriaceae	0	1	0	0	0	84	1	0	0	0	1	157	52	0	0	1	74	0	0	0	28	0	0	0	2	0	0	0	0	0	0	1	0	0	0	0	77	2	0	0	0	0	0	11	0	0	0	0
OTU35	d__Bacteria; p__Proteobacteria; c__Gammaproteobacteria; o__Aeromonadales; f__Succinivibrionaceae; g__Succinivibrio	0	0	0	0	0	0	0	0	0	0	0	0	10	0	0	0	0	0	0	0	0	0	0	0	0	2	0	0	0	0	0	0	0	0	279	2901	0	5	9561	0	1	1	0	0	0	0	20	0
OTU309	d__Bacteria; p__Proteobacteria; c__Gammaproteobacteria; o__Aeromonadales; f__Succinivibrionaceae; g__Succinatimonas	0	0	0	0	0	0	0	0	0	0	0	0	0	1	0	0	0	0	0	0	0	0	0	0	0	0	0	0	0	0	0	0	0	0	0	0	0	0	0	0	0	0	0	0	0	0	0	0
OTU535	d__Bacteria; p__Proteobacteria; c__Epsilonproteobacteria; o__Campylobacterales; f__Helicobacteraceae; g__Helicobacter	0	2	0	0	0	0	0	0	0	0	0	0	4	0	0	0	0	0	0	0	0	0	1	0	0	2	0	0	0	0	0	0	0	5	0	0	0	0	0	0	0	0	0	0	0	0	0	0
OTU434	d__Bacteria; p__Proteobacteria; c__Epsilonproteobacteria; o__Campylobacterales; f__Campylobacteraceae; g__Campylobacter	0	0	0	0	0	0	0	0	0	0	0	0	0	0	0	0	0	0	0	0	0	0	0	0	0	0	0	0	2	0	0	0	0	0	0	0	0	0	0	0	0	0	0	0	0	4	0	0
OTU98	d__Bacteria; p__Proteobacteria; c__Deltaproteobacteria; o__Desulfovibrionales; f__Desulfovibrionaceae; g__Desulfovibrio	47	0	0	0	0	0	226	0	0	0	0	0	2	0	38	0	176	0	123	0	0	0	0	0	226	257	0	359	0	0	1	194	71	0	24	200	0	0	0	0	0	0	51	0	0	0	0	40
OTU314	d__Bacteria; p__Proteobacteria; c__Deltaproteobacteria; o__Desulfovibrionales; f__Desulfovibrionaceae; g__Desulfovibrio	1	0	0	0	0	0	6	0	0	0	0	0	0	0	0	0	8	0	3	0	1	0	0	0	5	8	0	7	0	0	25	2	3	0	2	2	0	0	0	0	0	0	1	0	0	0	0	1
OTU352	d__Bacteria; p__Proteobacteria; c__Deltaproteobacteria; o__Desulfovibrionales; f__Desulfovibrionaceae; g__Desulfovibrio	0	0	0	0	4	0	0	0	0	1	0	0	0	0	0	0	0	0	0	0	0	0	0	0	0	0	0	0	0	0	0	0	0	0	0	0	0	0	0	0	6	0	0	0	0	0	0	0
OTU410	d__Bacteria; p__Proteobacteria; c__Deltaproteobacteria; o__Desulfovibrionales; f__Desulfovibrionaceae; g__Desulfovibrio	0	0	0	0	0	0	0	0	0	0	0	0	0	0	0	0	0	0	0	0	0	0	0	0	0	0	0	0	0	0	0	0	0	0	0	0	0	0	0	0	0	0	0	0	0	0	0	0
OTU504	d__Bacteria; p__Proteobacteria; c__Deltaproteobacteria; o__Desulfovibrionales; f__Desulfovibrionaceae; g__Desulfobaculum	0	0	0	0	0	0	0	0	0	0	0	0	0	1	0	0	0	0	0	0	0	0	0	0	5	0	0	15	0	1	0	0	0	0	0	0	0	0	0	0	0	0	0	0	0	0	0	0
OTU60	d__Bacteria; p__Proteobacteria; c__Deltaproteobacteria; o__Desulfovibrionales; f__Desulfovibrionaceae; g__Bilophila	22	1	13	298	40	95	6	71	59	71	23	0	12	40	33	5	51	59	81	74	7	76	4	45	33	81	11	166	0	74	42	36	42	17	4	5	2	34	0	198	43	60	39	0	69	1	13	14
OTU195	d__Bacteria; p__Proteobacteria; c__Deltaproteobacteria; o__Desulfovibrionales; f__Desulfovibrionaceae	0	0	0	0	0	0	1	0	0	0	0	0	0	0	0	0	0	0	0	0	0	126	0	0	0	0	0	0	0	0	0	0	0	0	0	0	0	0	0	0	0	41	0	0	0	0	0	0
OTU428	d__Bacteria; p__Proteobacteria; c__Deltaproteobacteria; o__Desulfovibrionales; f__Desulfovibrionaceae	0	0	0	0	0	0	0	0	0	0	0	0	0	0	0	0	2	0	0	0	0	0	0	0	0	0	0	0	0	0	0	6	0	0	0	0	0	0	0	0	0	0	0	0	0	0	0	0
OTU463	d__Bacteria; p__Proteobacteria; c__Deltaproteobacteria; o__Desulfovibrionales; f__Desulfovibrionaceae	2	7	6	0	0	0	0	0	0	0	0	0	2	0	0	0	0	0	0	0	0	0	0	0	0	0	0	0	0	0	0	0	0	3	0	0	0	0	0	0	0	0	0	0	0	0	0	0
OTU533	d__Bacteria; p__Proteobacteria; c__Deltaproteobacteria; o__Desulfovibrionales; f__Desulfovibrionaceae	0	0	0	0	0	0	54	0	0	0	0	0	0	12	0	0	3	0	0	0	0	0	0	0	0	0	0	0	0	54	0	0	0	0	6	39	0	0	0	0	0	0	0	0	0	0	0	0
OTU589	d__Bacteria; p__Proteobacteria; c__Deltaproteobacteria; o__Desulfovibrionales; f__Desulfovibrionaceae	0	1	0	0	0	0	0	0	0	0	0	2	6	0	0	0	0	0	0	0	0	0	2	0	0	0	0	0	0	0	0	0	0	4	0	0	0	0	0	0	0	0	0	0	2	0	0	0
OTU349	d__Bacteria; p__Proteobacteria; c__Deltaproteobacteria; o__Desulfovibrionales	0	0	0	0	0	0	0	0	0	26	0	0	0	0	0	0	0	0	0	0	0	0	0	0	0	0	0	0	0	0	17	0	0	0	0	0	0	0	0	0	0	0	0	0	0	0	0	0
OTU180	d__Bacteria; p__Proteobacteria; c__Deltaproteobacteria	0	0	0	0	0	0	0	0	0	0	0	0	0	0	0	0	0	0	0	0	0	0	0	0	0	0	0	0	0	0	0	0	0	0	0	0	0	0	0	0	0	0	0	0	0	0	0	0
OTU330	d__Bacteria; p__Proteobacteria; c__Deltaproteobacteria	0	0	0	0	0	0	0	0	0	0	0	0	0	0	0	0	0	0	0	0	0	0	0	0	0	0	0	0	0	0	0	0	0	0	0	0	0	0	0	0	0	0	0	0	0	0	0	0
OTU337	d__Bacteria; p__Proteobacteria; c__Deltaproteobacteria	0	0	0	0	0	0	0	0	0	0	0	0	0	0	0	0	0	0	0	0	0	0	0	0	0	0	0	0	0	0	0	0	0	0	0	0	0	0	0	0	0	0	0	0	0	0	0	0
OTU351	d__Bacteria; p__Proteobacteria; c__Deltaproteobacteria	0	0	0	0	0	0	0	0	0	0	0	0	0	0	0	0	0	0	0	0	0	0	0	0	0	0	0	0	0	0	0	0	0	0	11	126	0	0	0	0	0	0	0	0	0	0	1	0
OTU72	d__Bacteria; p__Proteobacteria; c__Betaproteobacteria; o__Burkholderiales; f__Sutterellaceae; g__Sutterella	0	0	0	0	0	193	337	0	0	0	0	0	2	0	0	0	0	0	0	0	0	0	0	0	0	0	0	0	0	0	112	376	0	1	19	218	0	0	565	0	0	0	0	0	679	0	4	0
OTU116	d__Bacteria; p__Proteobacteria; c__Betaproteobacteria; o__Burkholderiales; f__Sutterellaceae; g__Sutterella	0	0	0	0	0	0	0	494	0	0	0	0	3	0	0	0	0	0	0	0	124	0	0	0	0	385	0	0	0	0	9	0	0	0	16	148	0	0	0	0	0	519	0	0	0	0	1	0
OTU151	d__Bacteria; p__Proteobacteria; c__Betaproteobacteria; o__Burkholderiales; f__Sutterellaceae; g__Sutterella	0	0	0	1	342	0	0	0	0	0	0	0	1	0	0	0	0	0	0	0	0	0	0	0	0	0	0	0	0	0	0	0	0	0	0	0	0	0	0	0	374	0	0	0	0	0	0	0
OTU190	d__Bacteria; p__Proteobacteria; c__Betaproteobacteria; o__Burkholderiales; f__Sutterellaceae; g__Sutterella	0	0	0	0	0	0	0	0	0	0	0	0	0	0	0	0	0	0	0	1	0	59	0	0	0	0	0	0	0	0	0	0	0	0	0	0	0	0	0	0	0	0	0	0	0	0	0	0
OTU214	d__Bacteria; p__Proteobacteria; c__Betaproteobacteria; o__Burkholderiales; f__Sutterellaceae; g__Sutterella	0	0	0	0	0	0	0	0	131	0	35	0	0	0	0	0	0	0	0	0	0	0	0	0	0	0	0	738	0	0	0	0	0	0	0	0	0	0	0	0	0	0	0	0	0	0	0	0
OTU294	d__Bacteria; p__Proteobacteria; c__Betaproteobacteria; o__Burkholderiales; f__Sutterellaceae; g__Sutterella	0	0	0	0	0	0	0	0	0	0	0	0	0	0	0	0	0	0	0	0	0	0	0	0	0	0	0	0	0	0	0	0	0	0	0	0	0	0	0	0	0	0	0	0	0	0	0	0
OTU49	d__Bacteria; p__Proteobacteria; c__Betaproteobacteria; o__Burkholderiales; f__Sutterellaceae; g__Parasutterella	206	609	1	0	1	0	6	0	11	317	25	0	5	1	194	1	532	267	562	170	30	4	742	0	103	5	479	5	0	434	1	6	427	1	85	0	0	0	0	0	4	15	14	1	1	0	27	274
OTU153	d__Bacteria; p__Proteobacteria; c__Betaproteobacteria; o__Burkholderiales; f__Sutterellaceae; g__Parasutterella	0	0	0	0	0	0	0	0	0	0	0	0	0	0	0	0	0	0	0	0	0	0	0	0	0	1	52	22	0	0	0	0	0	0	0	0	0	0	0	0	0	0	0	0	0	0	0	0
OTU271	d__Bacteria; p__Proteobacteria; c__Betaproteobacteria; o__Burkholderiales; f__Sutterellaceae; g__Parasutterella	0	0	0	0	0	0	0	0	0	0	0	0	0	0	0	0	0	0	0	0	0	0	0	0	0	0	0	0	0	0	0	0	0	0	2	26	0	0	0	0	0	117	0	0	0	0	0	0
OTU319	d__Bacteria; p__Proteobacteria; c__Betaproteobacteria; o__Burkholderiales; f__Sutterellaceae; g__Parasutterella	0	28	0	0	1	0	0	0	0	0	0	0	0	0	0	0	0	0	1	0	0	1	0	249	0	0	0	0	0	0	0	0	0	0	0	0	0	0	0	0	3	0	0	0	0	0	0	1
OTU438	d__Bacteria; p__Proteobacteria; c__Betaproteobacteria; o__Burkholderiales; f__Oxalobacteraceae; g__Oxalobacter	0	0	0	0	0	0	0	0	0	0	3	0	0	0	0	0	4	0	1	1	0	0	0	5	7	2	0	7	0	0	2	1	0	0	0	8	0	0	0	1	0	0	0	0	0	0	0	0
OTU548	d__Bacteria; p__Proteobacteria; c__Betaproteobacteria; o__Burkholderiales; f__Comamonadaceae; g__Comamonas	0	0	0	15	0	0	0	0	0	7	1	0	0	0	0	0	0	0	0	0	1	0	0	0	0	0	0	0	0	0	0	0	0	0	0	0	0	0	0	36	1	0	0	0	0	0	0	0
OTU377	d__Bacteria; p__Proteobacteria; c__Betaproteobacteria; o__Burkholderiales; f__Alcaligenaceae; g__Achromobacter	0	0	0	1	0	0	0	0	0	0	0	0	0	0	0	0	0	0	0	0	0	0	0	0	0	0	0	0	0	1	1	1	0	0	0	0	0	0	0	0	0	0	0	0	0	0	0	0
OTU75	d__Bacteria; p__Proteobacteria; c__Betaproteobacteria; o__Burkholderiales	0	0	0	714	0	0	18	82	0	0	0	0	1	392	0	0	0	0	0	0	0	81	0	1	0	120	0	16	0	212	0	9	0	0	5	62	0	0	0	617	0	0	109	0	0	32	119	0
OTU146	d__Bacteria; p__Proteobacteria; c__Betaproteobacteria; o__Burkholderiales	0	0	109	0	0	0	0	0	0	62	0	0	181	0	0	0	0	0	0	0	0	0	0	0	42	65	0	5	0	1113	0	12	1	0	548	5	1	221	0	0	0	0	4	0	0	0	0	0
OTU158	d__Bacteria; p__Proteobacteria; c__Alphaproteobacteria; o__Rhodospirillales; f__Rhodospirillaceae	0	0	0	0	1	0	489	1	0	494	0	0	0	0	0	0	0	0	0	0	0	0	0	0	37	0	0	0	0	0	0	0	0	0	0	0	0	0	0	0	0	0	0	0	0	0	0	102
OTU257	d__Bacteria; p__Proteobacteria; c__Alphaproteobacteria; o__Rhodospirillales; f__Rhodospirillaceae	0	0	0	0	0	0	0	0	0	0	0	0	0	0	0	0	1	22	0	0	1	0	1	0	0	0	0	0	0	0	0	0	0	166	0	0	0	0	0	0	0	0	0	0	0	0	0	0
OTU353	d__Bacteria; p__Proteobacteria; c__Alphaproteobacteria; o__Rhodospirillales; f__Rhodospirillaceae	0	0	0	0	0	0	0	0	0	0	0	0	0	0	0	0	43	0	0	0	0	0	0	0	0	0	0	0	0	0	0	0	0	0	0	0	0	0	0	0	0	0	0	0	0	0	0	0
OTU354	d__Bacteria; p__Proteobacteria; c__Alphaproteobacteria; o__Rhodospirillales; f__Rhodospirillaceae	0	0	0	0	0	0	0	0	0	0	0	0	0	0	0	0	0	0	0	0	0	0	0	0	0	0	0	0	0	0	0	0	0	0	0	0	0	0	0	0	0	0	0	0	0	1	72	0
OTU236	d__Bacteria; p__Proteobacteria; c__Alphaproteobacteria; o__Rhizobiales; f__Brucellaceae; g__Ochrobactrum	0	0	0	0	0	0	0	0	0	0	0	0	0	0	0	0	0	0	0	0	0	0	0	0	0	0	0	0	0	0	0	0	0	0	0	0	0	0	0	0	0	0	0	0	0	0	0	0
OTU258	d__Bacteria; p__Lentisphaerae; c__Lentisphaeria; o__Victivallales; f__Victivallaceae; g__Victivallis	0	0	0	0	2	0	20	0	0	1	2	0	0	1	0	0	41	0	0	0	1	0	0	0	7	0	0	1	0	0	41	32	1	0	10	85	0	0	0	0	7	0	0	0	0	0	11	14
OTU369	d__Bacteria; p__Lentisphaerae; c__Lentisphaeria; o__Victivallales; f__Victivallaceae; g__Victivallis	0	0	0	0	3	0	0	0	0	14	0	0	0	0	0	0	0	0	0	0	0	1	0	0	8	4	0	15	1	0	0	2	0	0	4	15	0	0	0	0	4	0	0	0	0	0	0	17
OTU371	d__Bacteria; p__Lentisphaerae; c__Lentisphaeria; o__Victivallales; f__Victivallaceae; g__Victivallis	0	0	0	0	0	0	0	0	0	0	0	0	0	0	0	0	0	0	0	0	0	0	0	0	23	0	0	0	0	0	0	3	0	0	0	0	0	0	0	0	0	0	0	0	0	0	0	0
OTU380	d__Bacteria; p__Lentisphaerae	0	0	0	0	0	0	0	0	0	0	0	0	0	0	0	0	12	0	0	0	0	0	0	2	5	0	0	0	0	0	2	0	0	0	11	105	0	0	0	0	0	0	0	0	0	0	0	1
OTU19	d__Bacteria; p__Fusobacteria; c__Fusobacteriia; o__Fusobacteriales; f__Fusobacteriaceae; g__Fusobacterium	0	3	3141	1	1	0	0	0	1	2	0	0	4226	1	1	711	0	1	3758	0	0	1	0	0	0	0	1	158	4	879	0	0	2	0	1	0	2	5873	193	3	0	369	136	3745	3	171	413	0
OTU336	d__Bacteria; p__Fusobacteria; c__Fusobacteriia; o__Fusobacteriales; f__Fusobacteriaceae; g__Fusobacterium	0	0	0	2	1	0	0	0	0	0	0	0	4	0	2	1	0	0	0	0	3	0	0	0	0	0	0	0	7	0	0	0	0	0	0	0	0	0	0	0	2	0	0	0	0	2	0	0
OTU346	d__Bacteria; p__Fusobacteria; c__Fusobacteriia; o__Fusobacteriales; f__Fusobacteriaceae; g__Fusobacterium	2	0	41	32	0	0	0	0	0	0	1	0	182	0	0	1	0	0	15	0	0	1	0	0	0	0	0	0	180	2	0	0	2	1	1	0	0	107	0	20	0	1	1	2	827	4	1	0
OTU216	d__Bacteria; p__Fusobacteria; c__Fusobacteriia; o__Fusobacteriales; f__Fusobacteriaceae; g__Cetobacterium	0	0	0	0	0	0	0	0	0	0	0	0	0	0	0	0	0	0	0	0	0	0	0	0	0	0	0	0	0	0	0	0	0	0	0	0	0	0	0	0	0	0	0	1	0	0	0	0
OTU363	d__Bacteria; p__Fusobacteria; c__Fusobacteriia; o__Fusobacteriales; f__Fusobacteriaceae	0	0	0	0	0	0	0	0	0	0	0	0	0	0	0	0	0	0	0	0	0	0	0	0	0	0	0	0	0	0	0	0	0	0	0	0	0	0	0	0	0	0	0	0	0	0	0	0
OTU88	d__Bacteria; p__Firmicutes; c__Negativicutes; o__Selenomonadales; f__Veillonellaceae; g__Veillonella	5	5	94	3	38	4	2	0	2	21	14	0	25	2	15	45	0	1	16	2	52	1	58	0	0	6	0	1	384	133	0	4	11	1	4	1	193	173	0	1	46	37	1	0	0	19	2	4
OTU111	d__Bacteria; p__Firmicutes; c__Negativicutes; o__Selenomonadales; f__Veillonellaceae; g__Veillonella	3	4	7	0	5	0	0	0	0	0	1	0	1	0	8	6	0	1	3	1	16	2	21	0	0	0	0	0	113	40	0	0	2	1	1	0	35	10	0	0	3	0	0	0	0	0	2	0
OTU228	d__Bacteria; p__Firmicutes; c__Negativicutes; o__Selenomonadales; f__Veillonellaceae; g__Veillonella	0	0	0	0	0	0	0	0	0	0	0	0	0	0	0	0	0	0	0	0	0	0	1	0	0	0	0	0	0	0	0	0	0	1173	0	0	0	0	0	0	0	0	0	13	0	0	0	0
OTU269	d__Bacteria; p__Firmicutes; c__Negativicutes; o__Selenomonadales; f__Veillonellaceae; g__Veillonella	0	0	0	0	0	0	0	0	0	0	0	0	0	0	0	0	0	0	0	0	0	0	0	0	0	0	0	0	0	0	0	0	0	0	0	0	0	0	0	0	0	0	0	0	0	0	0	0
OTU405	d__Bacteria; p__Firmicutes; c__Negativicutes; o__Selenomonadales; f__Veillonellaceae; g__Veillonella	0	0	0	0	0	0	0	0	0	0	0	0	0	0	0	0	0	0	0	0	0	0	0	0	0	0	0	0	0	0	0	0	0	0	0	0	0	0	0	0	0	0	0	0	0	0	0	0
OTU163	d__Bacteria; p__Firmicutes; c__Negativicutes; o__Selenomonadales; f__Veillonellaceae; g__Mitsuokella	0	0	0	0	0	0	0	0	0	0	0	0	0	0	0	0	0	0	0	0	0	0	0	0	0	0	0	0	0	0	0	1192	0	0	18	185	0	1	55	0	0	0	0	0	0	0	1	0
OTU288	d__Bacteria; p__Firmicutes; c__Negativicutes; o__Selenomonadales; f__Veillonellaceae; g__Mitsuokella	0	0	0	0	0	0	0	0	0	0	0	0	3	0	0	0	0	0	0	0	0	0	0	0	0	0	0	0	0	0	0	215	0	0	37	360	0	1	637	0	0	0	0	0	1	0	0	0
OTU53	d__Bacteria; p__Firmicutes; c__Negativicutes; o__Selenomonadales; f__Veillonellaceae; g__Megasphaera	0	437	0	0	0	0	0	0	0	0	0	0	33	0	0	0	0	0	0	0	0	0	0	0	0	961	0	0	0	0	0	0	0	0	0	1	0	0	0	0	0	0	0	0	0	0	1	0
OTU206	d__Bacteria; p__Firmicutes; c__Negativicutes; o__Selenomonadales; f__Veillonellaceae; g__Megasphaera	0	0	0	0	0	0	0	0	0	0	0	0	0	0	0	0	0	0	0	0	0	0	0	0	0	0	0	0	0	0	0	0	0	0	0	0	0	0	0	0	0	0	0	0	0	0	0	0
OTU238	d__Bacteria; p__Firmicutes; c__Negativicutes; o__Selenomonadales; f__Veillonellaceae; g__Megasphaera	0	0	0	0	0	0	0	0	0	0	0	0	0	0	0	0	0	0	0	0	0	0	0	0	0	0	0	0	5	0	0	0	0	0	0	0	1	0	0	0	0	0	0	0	0	0	0	0
OTU305	d__Bacteria; p__Firmicutes; c__Negativicutes; o__Selenomonadales; f__Veillonellaceae; g__Megasphaera	0	0	0	0	0	0	0	0	0	0	0	1	1	0	0	0	0	0	0	0	0	0	0	0	0	0	0	1	0	0	0	270	0	0	0	0	0	0	0	0	0	0	0	0	0	0	0	0
OTU494	d__Bacteria; p__Firmicutes; c__Negativicutes; o__Selenomonadales; f__Veillonellaceae; g__Megasphaera	0	0	0	0	0	0	0	0	0	0	0	0	0	0	0	0	0	0	0	0	0	0	0	0	0	0	0	0	0	0	0	0	0	0	0	0	0	0	0	0	0	0	0	0	0	0	0	0
OTU17	d__Bacteria; p__Firmicutes; c__Negativicutes; o__Selenomonadales; f__Veillonellaceae; g__Megamonas	0	0	0	1	275	3	241	0	0	18	292	0	4	1	2	0	0	0	2269	0	0	216	0	642	0	316	2646	626	0	0	15	0	0	0	0	0	0	0	0	0	298	259	0	0	508	0	0	1
OTU247	d__Bacteria; p__Firmicutes; c__Negativicutes; o__Selenomonadales; f__Veillonellaceae; g__Megamonas	0	0	1	0	23	0	134	0	0	12	147	0	4	0	0	0	0	0	1723	0	0	68	0	206	0	547	1799	93	1	0	17	0	0	1	0	0	0	0	1	0	26	140	0	0	974	0	0	0
OTU40	d__Bacteria; p__Firmicutes; c__Negativicutes; o__Selenomonadales; f__Veillonellaceae; g__Dialister	0	0	0	0	215	0	2	0	1	0	2	0	6	0	0	0	325	0	0	0	0	0	0	0	744	2448	0	1	0	0	1	2508	0	0	0	0	0	0	0	0	283	0	0	0	0	0	0	141
OTU80	d__Bacteria; p__Firmicutes; c__Negativicutes; o__Selenomonadales; f__Veillonellaceae; g__Dialister	0	0	1	2	0	32	0	0	1	0	0	0	0	0	0	0	0	0	0	45	0	0	338	0	0	0	0	0	0	20	0	0	2	0	1	0	883	0	0	8	0	1	1	91	0	0	0	0
OTU137	d__Bacteria; p__Firmicutes; c__Negativicutes; o__Selenomonadales; f__Veillonellaceae; g__Dialister	0	0	0	0	0	0	0	0	0	0	0	0	0	0	0	0	0	0	0	0	0	0	0	0	0	0	0	0	0	1	0	0	1	0	128	1318	0	0	0	0	0	0	0	0	0	0	6	0
OTU167	d__Bacteria; p__Firmicutes; c__Negativicutes; o__Selenomonadales; f__Veillonellaceae; g__Dialister	0	738	0	0	0	0	0	0	0	0	0	0	0	0	0	0	0	0	0	0	0	0	0	0	0	0	0	0	0	0	0	0	0	0	0	0	0	0	0	0	0	243	0	0	0	0	0	0
OTU343	d__Bacteria; p__Firmicutes; c__Negativicutes; o__Selenomonadales; f__Veillonellaceae; g__Dialister	0	0	0	0	0	0	0	0	0	0	0	0	1	0	0	0	0	0	0	0	0	0	0	0	0	0	0	0	0	0	0	0	0	0	0	0	0	0	0	0	0	0	0	0	0	0	0	0
OTU207	d__Bacteria; p__Firmicutes; c__Negativicutes; o__Selenomonadales; f__Veillonellaceae; g__Allisonella	0	0	50	0	1	0	6	0	0	0	0	0	10	89	0	35	0	9	75	17	0	0	0	0	2	32	0	2	0	0	12	0	0	0	1	16	0	74	12	0	2	51	5	0	0	0	1	0
OTU430	d__Bacteria; p__Firmicutes; c__Negativicutes; o__Selenomonadales; f__Veillonellaceae	0	0	0	0	0	0	0	0	0	0	0	0	0	0	0	0	0	0	0	0	0	0	0	0	0	0	0	0	0	0	0	0	0	0	0	0	15	0	0	0	0	0	0	5	0	0	0	0
OTU6	d__Bacteria; p__Firmicutes; c__Negativicutes; o__Selenomonadales; f__Acidaminococcaceae; g__Phascolarctobacterium	315	18	16	2875	176	723	0	2217	354	609	371	1272	776	1709	458	92	127	430	670	477	0	30	0	1425	66	27	888	22	894	534	969	1	510	0	40	0	0	50	4	3844	209	205	13	0	408	27	204	11
OTU129	d__Bacteria; p__Firmicutes; c__Negativicutes; o__Selenomonadales; f__Acidaminococcaceae; g__Phascolarctobacterium	0	0	0	0	0	0	0	0	0	0	0	0	6	0	0	0	0	0	0	1	518	0	0	0	0	0	0	177	0	0	0	0	0	0	6	92	0	1	681	0	0	0	197	0	0	0	1	0
OTU174	d__Bacteria; p__Firmicutes; c__Negativicutes; o__Selenomonadales; f__Acidaminococcaceae; g__Phascolarctobacterium	0	0	0	0	0	0	0	0	1	0	0	0	0	0	0	0	0	0	0	0	0	507	0	0	0	0	0	0	0	0	0	0	0	0	0	0	0	0	0	0	0	0	0	0	0	0	0	0
OTU421	d__Bacteria; p__Firmicutes; c__Negativicutes; o__Selenomonadales; f__Acidaminococcaceae; g__Phascolarctobacterium	0	0	0	2	0	2	0	14	1	5	1	14	5	4	4	1	0	0	1	6	0	0	0	4	0	0	5	0	15	3	2	0	1	0	0	0	0	0	0	4	2	3	0	0	1	0	2	0
OTU584	d__Bacteria; p__Firmicutes; c__Negativicutes; o__Selenomonadales; f__Acidaminococcaceae; g__Phascolarctobacterium	0	0	0	2	0	0	0	1	0	0	0	1	0	0	0	0	0	0	0	0	0	0	0	0	0	0	0	0	0	0	0	0	0	0	0	0	0	0	0	0	0	0	0	0	0	0	0	0
OTU89	d__Bacteria; p__Firmicutes; c__Negativicutes; o__Selenomonadales; f__Acidaminococcaceae; g__Acidaminococcus	0	51	0	0	0	0	0	0	0	0	0	0	1	0	0	0	0	0	0	0	0	0	0	0	0	0	0	6	0	111	0	0	0	0	0	0	0	0	0	0	0	67	13	0	0	0	0	0
OTU260	d__Bacteria; p__Firmicutes; c__Negativicutes; o__Selenomonadales; f__Acidaminococcaceae; g__Acidaminococcus	0	0	0	0	0	0	0	0	0	0	0	0	0	0	0	0	0	0	0	0	0	0	0	0	0	0	0	0	0	143	0	0	0	6	0	0	0	0	0	0	0	0	1	0	0	0	0	0
OTU264	d__Bacteria; p__Firmicutes; c__Negativicutes; o__Selenomonadales; f__Acidaminococcaceae; g__Acidaminococcus	0	312	0	0	0	0	0	0	0	0	0	0	0	0	0	0	0	0	0	0	0	0	0	0	0	0	0	1	0	12	0	0	0	0	0	0	0	0	0	0	0	2	0	0	0	0	0	0
OTU347	d__Bacteria; p__Firmicutes; c__Negativicutes; o__Selenomonadales; f__Acidaminococcaceae; g__Acidaminococcus	0	0	0	0	0	0	0	0	0	0	0	0	1	0	0	0	0	0	0	0	0	0	0	0	0	0	0	0	0	0	0	0	0	0	0	0	0	0	0	0	0	0	0	0	0	0	0	0
OTU161	d__Bacteria; p__Firmicutes; c__Negativicutes; o__Selenomonadales; f__Acidaminococcaceae	0	0	0	0	0	571	584	0	0	0	0	0	0	7	0	0	0	0	0	0	0	0	0	0	0	0	0	0	0	0	0	0	0	0	0	0	0	0	0	0	0	2	0	0	0	0	0	0
OTU172	d__Bacteria; p__Firmicutes; c__Erysipelotrichia; o__Erysipelotrichales; f__Erysipelotrichaceae; g__Turicibacter	0	0	28	0	1	0	6	1	0	1	4	0	5	27	0	1	1	0	0	0	1	1	0	0	10	2	10	7	10	0	0	2	0	0	0	0	0	36	0	1	1	1	0	1	0	0	0	0
OTU384	d__Bacteria; p__Firmicutes; c__Erysipelotrichia; o__Erysipelotrichales; f__Erysipelotrichaceae; g__Solobacterium	0	2	3	2	0	1	0	0	0	1	0	1	2	0	0	1	0	0	3	0	1	1	0	0	0	0	0	1	4	0	1	0	0	1	0	0	4	1	1	7	0	2	0	0	3	0	0	2
OTU191	d__Bacteria; p__Firmicutes; c__Erysipelotrichia; o__Erysipelotrichales; f__Erysipelotrichaceae; g__Holdemania	0	3	0	2	0	0	8	4	6	5	3	65	0	5	5	2	4	2	5	4	1	7	0	13	5	1	3	8	0	21	9	1	0	0	0	0	0	0	0	3	3	8	7	0	0	0	8	0
OTU79	d__Bacteria; p__Firmicutes; c__Erysipelotrichia; o__Erysipelotrichales; f__Erysipelotrichaceae; g__Holdemanella	0	0	0	20	0	0	0	362	0	0	69	0	0	164	0	0	833	0	1	157	0	0	0	0	112	0	1	267	0	0	159	68	0	0	324	42	0	0	30	31	0	1	0	0	0	121	276	22
OTU412	d__Bacteria; p__Firmicutes; c__Erysipelotrichia; o__Erysipelotrichales; f__Erysipelotrichaceae; g__Faecalicoccus	0	0	0	0	0	0	0	0	0	0	0	0	0	0	0	0	0	0	0	0	16	0	0	0	0	0	0	0	0	0	0	0	0	0	0	0	0	0	0	0	0	0	0	0	0	0	0	0
OTU122	d__Bacteria; p__Firmicutes; c__Erysipelotrichia; o__Erysipelotrichales; f__Erysipelotrichaceae; g__Erysipelotrichaceae_incertae_sedis	1	0	10	1	0	3	1	7	1	0	0	8	0	1	2	1	1	2	2	0	0	3	3	1	0	10	0	1	27	2	0	0	3	5	0	0	11	8	0	4	0	4	0	57	2	0	0	1
OTU179	d__Bacteria; p__Firmicutes; c__Erysipelotrichia; o__Erysipelotrichales; f__Erysipelotrichaceae; g__Erysipelotrichaceae_incertae_sedis	0	0	0	0	0	0	0	35	0	0	0	164	24	0	0	0	0	0	0	0	0	0	0	0	0	0	0	0	0	0	0	0	0	411	0	0	0	0	0	0	0	0	19	0	0	0	0	0
OTU284	d__Bacteria; p__Firmicutes; c__Erysipelotrichia; o__Erysipelotrichales; f__Erysipelotrichaceae; g__Erysipelotrichaceae_incertae_sedis	0	0	14	0	0	4	0	0	0	2	0	0	0	0	0	0	0	1	18	0	0	0	0	0	0	0	0	0	0	0	0	0	0	0	0	0	0	12	0	0	0	0	2	14	0	0	0	0
OTU289	d__Bacteria; p__Firmicutes; c__Erysipelotrichia; o__Erysipelotrichales; f__Erysipelotrichaceae; g__Erysipelotrichaceae_incertae_sedis	8	2	0	0	1	0	1	1	0	1	0	0	0	0	0	0	0	0	0	1	0	0	0	0	1	0	0	0	0	0	0	0	15	0	0	0	0	0	0	0	1	0	0	0	0	0	0	0
OTU528	d__Bacteria; p__Firmicutes; c__Erysipelotrichia; o__Erysipelotrichales; f__Erysipelotrichaceae; g__Erysipelotrichaceae_incertae_sedis	11	2	0	0	0	0	3	0	0	0	0	0	11	0	3	28	0	0	0	0	5	0	0	5	0	2	1	1	64	0	0	0	23	0	0	0	3	0	0	0	0	0	0	0	0	0	1	0
OTU248	d__Bacteria; p__Firmicutes; c__Erysipelotrichia; o__Erysipelotrichales; f__Erysipelotrichaceae; g__Coprobacillus	0	0	29	0	0	1	0	5	14	0	0	0	0	0	0	0	0	2	13	0	1	1	3	0	0	8	0	6	0	1	39	0	0	0	0	0	31	29	0	4	0	4	8	2	3	0	0	0
OTU370	d__Bacteria; p__Firmicutes; c__Erysipelotrichia; o__Erysipelotrichales; f__Erysipelotrichaceae; g__Coprobacillus	0	0	0	0	0	0	45	0	0	0	0	27	1	0	0	0	0	2	0	0	0	0	0	0	0	0	0	0	0	0	0	0	0	0	0	0	0	0	0	0	0	0	0	0	0	0	0	0
OTU25	d__Bacteria; p__Firmicutes; c__Erysipelotrichia; o__Erysipelotrichales; f__Erysipelotrichaceae; g__Clostridium_XVIII	1	64	0	239	245	0	66	41	150	210	443	199	159	14	447	264	90	98	0	62	81	477	0	83	24	192	47	159	0	155	12	178	0	0	407	96	318	1	36	626	284	326	0	0	90	324	124	22
OTU68	d__Bacteria; p__Firmicutes; c__Erysipelotrichia; o__Erysipelotrichales; f__Erysipelotrichaceae; g__Clostridium_XVIII	19	0	238	0	0	14	4	0	0	3	1	17	1	0	1	0	0	2	95	1	0	0	39	0	0	0	0	0	202	3	1	0	29	69	0	0	2	171	0	0	0	0	89	188	2	0	0	0
OTU326	d__Bacteria; p__Firmicutes; c__Erysipelotrichia; o__Erysipelotrichales; f__Erysipelotrichaceae; g__Clostridium_XVIII	1	1	0	0	0	0	0	0	0	0	0	4	2	0	0	0	0	0	0	0	0	0	6	0	0	1	0	4	0	0	0	0	3	0	0	0	0	0	0	0	0	0	0	24	0	0	0	0
OTU414	d__Bacteria; p__Firmicutes; c__Erysipelotrichia; o__Erysipelotrichales; f__Erysipelotrichaceae; g__Clostridium_XVIII	0	0	0	0	0	0	0	0	0	0	0	0	0	4	5	0	0	0	0	0	0	0	0	0	0	0	0	0	0	0	0	0	0	0	0	0	0	0	0	0	0	0	0	1	0	0	0	0
OTU287	d__Bacteria; p__Firmicutes; c__Erysipelotrichia; o__Erysipelotrichales; f__Erysipelotrichaceae; g__Catenibacterium	0	0	0	0	0	0	0	0	0	0	0	0	0	115	0	0	0	0	0	0	0	0	0	0	0	0	0	24	0	0	0	0	0	0	7	77	0	0	0	0	0	0	0	0	0	0	0	0
OTU433	d__Bacteria; p__Firmicutes; c__Erysipelotrichia; o__Erysipelotrichales; f__Erysipelotrichaceae	0	0	1	0	0	0	0	0	0	0	0	1	13	0	0	0	0	0	0	0	0	0	0	0	0	0	0	0	0	0	0	1	0	0	0	1	0	0	1	0	0	0	0	0	0	0	1	0
OTU475	d__Bacteria; p__Firmicutes; c__Erysipelotrichia; o__Erysipelotrichales; f__Erysipelotrichaceae	0	0	0	0	0	0	0	0	0	0	0	0	0	0	0	0	0	0	0	0	0	0	0	0	0	1	0	0	0	0	0	0	0	0	0	0	0	0	0	0	0	0	0	0	0	0	0	0
OTU382	d__Bacteria; p__Firmicutes; c__Clostridia; o__Clostridiales; f__Ruminococcaceae; g__Sporobacter	0	0	0	0	0	0	0	0	1	0	0	3	0	1	0	0	1	0	0	0	0	0	0	1	0	0	0	2	0	0	0	0	0	0	0	0	0	0	0	0	0	3	0	0	0	0	0	1
OTU26	d__Bacteria; p__Firmicutes; c__Clostridia; o__Clostridiales; f__Ruminococcaceae; g__Ruminococcus	157	6	0	1	996	453	1037	238	1107	0	55	371	6	368	262	101	512	378	1197	192	47	1340	1	0	568	18	0	26	0	415	827	69	335	0	20	199	2253	0	0	1	1312	267	1471	1	826	3	187	271
OTU34	d__Bacteria; p__Firmicutes; c__Clostridia; o__Clostridiales; f__Ruminococcaceae; g__Ruminococcus	0	0	0	0	291	1	880	147	220	66	6	51	3	9	194	0	0	655	0	19	11	149	0	14	41	4	1	8	0	980	68	4	0	1	76	366	1363	2	0	0	340	281	2	0	0	1	33	77
OTU76	d__Bacteria; p__Firmicutes; c__Clostridia; o__Clostridiales; f__Ruminococcaceae; g__Ruminococcus	0	195	0	0	237	0	0	80	0	224	0	10	3	98	258	0	0	237	0	0	7	93	0	67	32	303	0	27	0	0	75	76	0	0	4	110	166	0	0	0	244	100	0	0	0	0	15	61
OTU143	d__Bacteria; p__Firmicutes; c__Clostridia; o__Clostridiales; f__Ruminococcaceae; g__Ruminococcus	0	0	0	0	0	207	121	174	21	4	29	0	0	1	38	0	0	0	0	84	90	0	0	0	18	0	0	28	0	143	0	58	0	0	0	0	0	0	0	0	0	0	0	0	0	4	68	1
OTU329	d__Bacteria; p__Firmicutes; c__Clostridia; o__Clostridiales; f__Ruminococcaceae; g__Ruminococcus	0	0	0	0	0	0	0	0	0	0	0	0	0	0	0	0	0	0	0	0	0	0	0	0	0	0	0	0	0	0	0	0	0	0	0	0	0	0	0	0	0	0	0	0	0	0	0	0
OTU339	d__Bacteria; p__Firmicutes; c__Clostridia; o__Clostridiales; f__Ruminococcaceae; g__Ruminococcus	0	0	0	0	0	0	0	0	0	0	0	0	0	0	0	0	0	0	0	0	0	0	0	0	0	0	0	0	0	0	0	0	0	0	0	0	0	0	0	0	0	0	0	0	0	0	0	168
OTU362	d__Bacteria; p__Firmicutes; c__Clostridia; o__Clostridiales; f__Ruminococcaceae; g__Ruminococcus	0	0	0	0	0	0	0	0	0	0	1	0	1	0	0	0	0	0	0	0	0	0	0	0	81	0	0	0	0	0	0	0	0	0	0	0	0	0	0	0	0	0	0	0	0	0	0	0
OTU374	d__Bacteria; p__Firmicutes; c__Clostridia; o__Clostridiales; f__Ruminococcaceae; g__Ruminococcus	0	0	0	0	0	0	0	0	0	0	0	0	0	0	0	0	134	0	0	0	0	0	0	0	0	1	0	0	0	0	0	0	0	0	0	0	0	0	0	0	0	0	0	0	1	0	0	0
OTU510	d__Bacteria; p__Firmicutes; c__Clostridia; o__Clostridiales; f__Ruminococcaceae; g__Ruminococcus	0	0	1	0	0	0	0	0	1	0	0	0	0	0	0	0	0	0	0	0	0	0	0	0	27	0	0	0	0	0	0	0	0	0	0	0	0	0	0	0	0	0	0	0	0	0	0	0
OTU550	d__Bacteria; p__Firmicutes; c__Clostridia; o__Clostridiales; f__Ruminococcaceae; g__Ruminococcus	1	0	0	0	8	1	3	2	699	0	0	2	0	0	212	2	1	284	2	1	1	9	1	0	288	0	0	0	0	1	1	39	1	0	9	123	10	1	0	0	16	1	1072	0	4	0	4	3
OTU563	d__Bacteria; p__Firmicutes; c__Clostridia; o__Clostridiales; f__Ruminococcaceae; g__Pseudoflavonifractor	0	0	0	0	0	0	0	0	0	0	0	0	0	0	0	0	0	0	0	0	0	0	0	0	16	0	0	12	0	0	0	0	0	0	0	0	0	0	0	0	0	0	0	0	0	0	0	0
OTU57	d__Bacteria; p__Firmicutes; c__Clostridia; o__Clostridiales; f__Ruminococcaceae; g__Oscillibacter	18	16	0	42	5	0	35	75	9	6	3	143	1	10	13	0	33	42	1	11	15	11	1	127	2	206	0	162	0	47	40	8	21	0	1	9	0	0	0	41	5	153	18	0	27	0	1	15
OTU69	d__Bacteria; p__Firmicutes; c__Clostridia; o__Clostridiales; f__Ruminococcaceae; g__Oscillibacter	147	28	0	107	79	0	76	76	352	94	92	37	0	72	77	0	211	17	0	142	73	186	0	219	182	134	12	127	0	57	377	110	240	0	35	351	0	0	2	73	84	169	8	0	2	0	68	40
OTU74	d__Bacteria; p__Firmicutes; c__Clostridia; o__Clostridiales; f__Ruminococcaceae; g__Oscillibacter	110	36	0	45	108	0	411	439	381	157	193	123	6	279	301	1	875	80	2	938	62	583	0	345	306	239	3	1170	0	1	1370	753	192	0	104	1045	0	0	0	49	125	349	184	0	6	0	51	178
OTU152	d__Bacteria; p__Firmicutes; c__Clostridia; o__Clostridiales; f__Ruminococcaceae; g__Oscillibacter	6	0	0	6	4	1	50	18	9	4	2	33	1	1	0	0	11	4	1	12	0	5	0	20	0	17	0	19	0	3	6	11	8	0	0	2	24	0	0	3	5	12	9	0	2	0	0	0
OTU205	d__Bacteria; p__Firmicutes; c__Clostridia; o__Clostridiales; f__Ruminococcaceae; g__Oscillibacter	17	19	0	1	14	0	59	67	14	30	16	30	0	27	7	0	14	17	0	11	6	0	0	14	1	38	18	15	0	0	14	23	52	0	7	42	0	0	1	2	20	13	35	0	0	1	27	4
OTU400	d__Bacteria; p__Firmicutes; c__Clostridia; o__Clostridiales; f__Ruminococcaceae; g__Oscillibacter	0	0	0	0	0	0	0	0	0	0	0	0	0	3	0	0	0	0	0	0	0	0	0	0	0	1	0	36	0	0	5	0	0	0	1	3	0	0	0	0	0	0	0	0	0	0	0	1
OTU425	d__Bacteria; p__Firmicutes; c__Clostridia; o__Clostridiales; f__Ruminococcaceae; g__Oscillibacter	0	0	0	0	0	0	0	0	0	0	0	0	0	0	0	0	0	0	0	0	0	0	0	5	1	0	0	0	0	0	1	0	0	0	1	6	0	0	0	0	0	0	0	0	0	0	0	1
OTU448	d__Bacteria; p__Firmicutes; c__Clostridia; o__Clostridiales; f__Ruminococcaceae; g__Oscillibacter	0	0	0	0	0	0	0	0	0	0	0	0	0	2	2	0	10	0	0	0	0	0	0	0	7	0	0	34	0	0	37	15	0	0	5	57	0	0	0	0	0	0	0	0	0	0	0	1
OTU333	d__Bacteria; p__Firmicutes; c__Clostridia; o__Clostridiales; f__Ruminococcaceae; g__Intestinimonas	2	0	0	5	0	0	1	0	1	1	0	1	0	0	0	0	14	3	0	0	0	0	0	4	0	6	0	2	0	0	2	0	7	0	0	1	0	0	0	7	0	6	0	0	0	0	0	0
OTU513	d__Bacteria; p__Firmicutes; c__Clostridia; o__Clostridiales; f__Ruminococcaceae; g__Intestinimonas	1	1	0	4	1	1	5	4	0	0	0	0	0	0	0	0	0	1	0	1	0	2	0	0	0	0	0	6	0	0	0	0	2	0	0	2	0	0	0	3	0	0	1	0	0	0	0	0
OTU14	d__Bacteria; p__Firmicutes; c__Clostridia; o__Clostridiales; f__Ruminococcaceae; g__Gemmiger	0	40	0	92	1439	493	0	203	274	1232	947	92	9	777	456	36	373	1	0	363	0	243	1236	193	403	770	114	399	0	2128	853	230	1	2	394	311	909	0	37	148	1752	639	526	3	737	210	1104	193
OTU18	d__Bacteria; p__Firmicutes; c__Clostridia; o__Clostridiales; f__Ruminococcaceae; g__Gemmiger	0	0	0	7	100	14	886	457	974	33	74	2	5	309	261	1	129	1	2	2067	337	393	272	259	252	500	7	134	0	5	115	56	0	0	91	154	948	0	14	15	124	863	664	0	12	10	40	799
OTU66	d__Bacteria; p__Firmicutes; c__Clostridia; o__Clostridiales; f__Ruminococcaceae; g__Flavonifractor	16	45	67	39	6	73	46	27	7	2	2	359	27	18	5	3	7	26	47	2	8	11	264	13	3	53	2	68	149	54	16	0	29	35	1	6	182	114	0	38	13	97	33	59	40	0	5	1
OTU218	d__Bacteria; p__Firmicutes; c__Clostridia; o__Clostridiales; f__Ruminococcaceae; g__Flavonifractor	14	7	12	6	2	4	31	8	6	6	1	2	0	9	3	0	1	4	3	2	0	4	1	9	7	17	0	39	0	0	1	2	33	1	0	1	2	14	0	4	1	30	23	0	4	0	0	0
OTU511	d__Bacteria; p__Firmicutes; c__Clostridia; o__Clostridiales; f__Ruminococcaceae; g__Flavonifractor	0	0	0	0	0	0	0	0	0	0	0	0	0	0	0	0	0	0	0	0	0	0	0	0	0	0	0	0	0	0	0	0	0	0	0	0	0	0	0	0	0	0	0	0	0	0	0	0
OTU540	d__Bacteria; p__Firmicutes; c__Clostridia; o__Clostridiales; f__Ruminococcaceae; g__Flavonifractor	0	0	0	0	0	0	4	0	0	0	0	0	0	0	0	0	0	0	0	1	0	0	0	0	0	0	0	0	0	0	0	0	0	0	1	2	0	0	0	0	0	0	0	0	0	0	1	0
OTU2	d__Bacteria; p__Firmicutes; c__Clostridia; o__Clostridiales; f__Ruminococcaceae; g__Faecalibacterium	3275	2229	1	1237	3755	2729	4240	4464	3556	3005	1920	641	626	6186	3166	6995	2872	2388	588	5015	4347	2557	1977	2427	1823	1501	1071	3241	3404	6	5019	4328	7095	1070	3929	3155	3028	2	402	1699	5061	2966	1701	3	386	1533	2540	1877
OTU474	d__Bacteria; p__Firmicutes; c__Clostridia; o__Clostridiales; f__Ruminococcaceae; g__Faecalibacterium	19	69	0	93	223	56	182	120	332	131	32	75	4	184	122	148	59	2	2	88	32	163	50	251	67	9	40	204	0	1	119	52	39	402	191	96	63	0	13	104	314	379	168	0	82	59	125	146
OTU492	d__Bacteria; p__Firmicutes; c__Clostridia; o__Clostridiales; f__Ruminococcaceae; g__Faecalibacterium	15	11	0	3	26	31	12	42	58	49	24	7	3	35	99	105	62	18	0	50	127	28	6	16	23	0	13	34	129	0	14	5	63	2	74	7	70	0	4	8	35	75	17	1	6	42	44	24
OTU495	d__Bacteria; p__Firmicutes; c__Clostridia; o__Clostridiales; f__Ruminococcaceae; g__Faecalibacterium	0	3	0	0	0	0	0	0	0	0	1	0	0	5	1	0	3	0	0	3	0	0	0	0	0	0	0	16	0	0	0	6	0	0	0	6	0	0	0	0	0	0	0	0	0	0	0	0
OTU65	d__Bacteria; p__Firmicutes; c__Clostridia; o__Clostridiales; f__Ruminococcaceae; g__Clostridium_IV	282	195	0	10	0	0	0	1	0	735	0	0	4	0	0	0	3	0	0	0	0	7	0	0	122	0	0	4	0	0	15	1	588	0	0	0	0	0	1	21	0	133	0	0	0	0	91	289
OTU90	d__Bacteria; p__Firmicutes; c__Clostridia; o__Clostridiales; f__Ruminococcaceae; g__Clostridium_IV	0	0	0	0	118	0	0	0	0	259	30	0	0	0	646	0	679	0	0	0	3	0	1	0	22	2	1	21	0	0	0	8	0	0	0	4	0	0	0	0	186	0	0	0	0	3	170	0
OTU124	d__Bacteria; p__Firmicutes; c__Clostridia; o__Clostridiales; f__Ruminococcaceae; g__Clostridium_IV	4	13	11	0	0	42	40	2	13	27	0	72	12	0	4	17	0	16	19	17	4	0	16	5	0	49	13	0	19	21	0	0	5	17	0	0	32	15	0	0	0	29	9	19	1	0	0	1
OTU154	d__Bacteria; p__Firmicutes; c__Clostridia; o__Clostridiales; f__Ruminococcaceae; g__Clostridium_IV	7	0	0	0	7	0	0	7	14	0	6	0	1	13	67	0	26	0	0	14	0	297	0	0	4	0	0	4	0	0	21	41	22	0	3	6	0	0	1	0	3	0	0	0	0	0	1	0
OTU160	d__Bacteria; p__Firmicutes; c__Clostridia; o__Clostridiales; f__Ruminococcaceae; g__Clostridium_IV	0	0	0	0	0	0	0	0	0	27	3	0	2	0	0	0	0	0	0	0	0	0	0	1	486	0	0	0	0	0	0	0	0	0	4	0	0	0	0	0	0	0	0	0	0	0	0	120
OTU202	d__Bacteria; p__Firmicutes; c__Clostridia; o__Clostridiales; f__Ruminococcaceae; g__Clostridium_IV	3	0	0	0	86	0	4	5	3	3	5	3	0	52	1	0	121	0	0	2	2	5	0	23	0	52	0	2	0	25	3	74	20	0	0	0	0	0	0	2	98	2	5	0	0	0	0	5
OTU237	d__Bacteria; p__Firmicutes; c__Clostridia; o__Clostridiales; f__Ruminococcaceae; g__Clostridium_IV	0	0	0	0	0	0	0	0	0	0	16	0	0	0	0	0	0	0	0	0	0	1	0	0	0	0	0	0	0	0	0	0	0	0	24	320	0	0	0	0	0	0	0	0	0	0	2	0
OTU251	d__Bacteria; p__Firmicutes; c__Clostridia; o__Clostridiales; f__Ruminococcaceae; g__Clostridium_IV	0	0	0	0	0	0	0	0	59	177	84	0	1	0	0	0	0	0	0	0	1	0	0	1	86	0	0	0	0	0	0	0	0	0	0	0	0	0	0	0	0	0	0	0	0	0	1	35
OTU272	d__Bacteria; p__Firmicutes; c__Clostridia; o__Clostridiales; f__Ruminococcaceae; g__Clostridium_IV	0	0	0	3	0	0	0	7	1	0	0	2	0	0	0	0	6	0	0	1	1	4	0	1	0	2	0	0	0	0	2	0	0	0	1	0	0	0	0	0	0	3	1	0	0	0	0	0
OTU300	d__Bacteria; p__Firmicutes; c__Clostridia; o__Clostridiales; f__Ruminococcaceae; g__Clostridium_IV	2	5	0	0	1	0	0	1	0	0	23	0	0	0	0	0	2	0	0	7	0	0	0	10	9	0	0	2	0	0	0	0	11	0	0	0	0	0	0	0	3	0	0	0	0	0	1	3
OTU311	d__Bacteria; p__Firmicutes; c__Clostridia; o__Clostridiales; f__Ruminococcaceae; g__Clostridium_IV	0	0	0	13	9	0	0	14	0	0	12	0	0	0	0	0	14	0	0	0	0	10	0	0	0	0	0	0	0	0	25	5	0	0	0	0	0	0	1	12	16	0	0	0	11	0	5	0
OTU457	d__Bacteria; p__Firmicutes; c__Clostridia; o__Clostridiales; f__Ruminococcaceae; g__Clostridium_IV	0	0	0	0	0	0	0	2	0	1	0	3	0	1	0	0	0	0	0	4	1	1	0	3	0	2	0	4	0	0	0	2	0	0	0	0	0	0	0	0	0	0	0	0	0	0	0	0
OTU519	d__Bacteria; p__Firmicutes; c__Clostridia; o__Clostridiales; f__Ruminococcaceae; g__Clostridium_IV	0	0	0	0	0	0	0	2	1	1	0	0	0	0	0	0	49	0	0	0	0	0	0	0	3	8	0	0	0	0	0	8	0	0	0	1	0	0	0	0	1	0	0	0	0	0	3	0
OTU545	d__Bacteria; p__Firmicutes; c__Clostridia; o__Clostridiales; f__Ruminococcaceae; g__Clostridium_IV	0	0	0	0	0	0	0	0	3	0	0	0	0	0	0	0	0	0	0	0	0	0	0	0	0	0	0	6	0	0	0	0	0	0	0	0	0	0	0	0	0	0	0	0	0	0	0	0
OTU70	d__Bacteria; p__Firmicutes; c__Clostridia; o__Clostridiales; f__Ruminococcaceae; g__Butyricicoccus	1	59	184	220	35	459	172	34	128	85	201	68	232	87	26	7	113	450	159	70	77	71	111	58	28	108	37	37	483	215	5	21	0	0	372	366	411	182	18	202	40	75	77	331	44	118	54	89
OTU99	d__Bacteria; p__Firmicutes; c__Clostridia; o__Clostridiales; f__Ruminococcaceae; g__Butyricicoccus	269	67	0	29	37	86	46	8	0	72	4	41	0	32	30	77	0	0	0	31	14	29	0	148	26	50	69	27	0	4	2	3	438	0	6	90	0	0	18	23	30	0	0	0	44	2	50	8
OTU232	d__Bacteria; p__Firmicutes; c__Clostridia; o__Clostridiales; f__Ruminococcaceae; g__Butyricicoccus	0	0	0	0	0	0	0	0	0	0	0	0	0	0	0	1	0	0	0	0	0	0	0	0	0	0	0	0	0	0	0	0	0	1	0	0	2	0	0	0	0	0	0	18	0	0	0	0
OTU324	d__Bacteria; p__Firmicutes; c__Clostridia; o__Clostridiales; f__Ruminococcaceae; g__Butyricicoccus	0	0	0	0	0	0	0	0	0	0	0	0	0	0	0	0	0	0	0	0	0	0	0	0	0	0	0	0	0	0	0	0	0	8	0	0	0	0	0	0	0	0	0	0	0	0	0	0
OTU334	d__Bacteria; p__Firmicutes; c__Clostridia; o__Clostridiales; f__Ruminococcaceae; g__Butyricicoccus	2	3	0	2	1	1	5	0	1	3	0	8	0	0	3	3	1	4	2	0	1	1	0	9	1	1	2	1	0	4	0	0	8	0	0	13	0	0	1	3	3	0	1	0	5	0	0	0
OTU464	d__Bacteria; p__Firmicutes; c__Clostridia; o__Clostridiales; f__Ruminococcaceae; g__Butyricicoccus	0	0	0	0	0	0	0	0	25	0	0	0	0	0	5	0	0	0	0	0	0	65	0	0	0	0	0	0	0	0	0	0	0	0	0	3	0	0	0	0	0	0	0	0	0	0	0	0
OTU580	d__Bacteria; p__Firmicutes; c__Clostridia; o__Clostridiales; f__Ruminococcaceae; g__Butyricicoccus	0	0	0	0	8	11	4	1	2	9	2	2	0	2	0	0	2	5	0	1	0	7	0	0	2	0	0	0	0	1	0	0	6	0	0	0	23	0	0	0	3	2	7	0	1	0	2	6
OTU223	d__Bacteria; p__Firmicutes; c__Clostridia; o__Clostridiales; f__Ruminococcaceae; g__Anaerotruncus	2	0	0	1	0	2	13	3	2	0	3	10	0	0	2	0	2	2	0	0	0	5	4	1	3	6	0	2	0	0	2	0	5	0	0	0	0	0	0	1	1	12	2	0	5	0	0	0
OTU403	d__Bacteria; p__Firmicutes; c__Clostridia; o__Clostridiales; f__Ruminococcaceae; g__Anaerotruncus	2	0	0	0	0	0	1	2	0	0	1	0	0	0	0	0	0	0	0	0	0	0	0	0	2	1	0	1	0	0	3	0	1	0	0	3	0	0	0	0	0	0	0	0	0	0	0	0
OTU579	d__Bacteria; p__Firmicutes; c__Clostridia; o__Clostridiales; f__Ruminococcaceae; g__Anaerofilum	0	0	0	0	0	0	0	0	1	0	1	0	0	1	0	0	4	0	0	1	0	0	0	0	0	0	0	4	0	0	1	0	0	0	0	1	0	0	0	0	0	0	0	0	0	0	0	0
OTU36	d__Bacteria; p__Firmicutes; c__Clostridia; o__Clostridiales; f__Ruminococcaceae	252	3	0	17	149	0	307	538	456	264	71	0	3	369	251	0	185	1	0	674	106	506	0	588	217	559	2	629	0	0	734	333	445	0	37	399	0	1	3	25	163	541	88	0	7	0	69	151
OTU42	d__Bacteria; p__Firmicutes; c__Clostridia; o__Clostridiales; f__Ruminococcaceae	135	90	0	0	124	15	240	116	38	154	82	43	1	94	120	0	8	94	145	16	49	480	68	2	86	41	13	43	342	88	4	14	227	203	25	0	28	0	5	0	137	68	31	2566	22	2	91	47
OTU52	d__Bacteria; p__Firmicutes; c__Clostridia; o__Clostridiales; f__Ruminococcaceae	0	0	0	0	1	0	0	0	1	3487	586	0	0	0	0	0	0	0	0	0	0	0	0	0	0	0	0	0	0	0	0	0	0	0	0	0	1	0	0	0	0	0	0	0	0	3	489	0
OTU54	d__Bacteria; p__Firmicutes; c__Clostridia; o__Clostridiales; f__Ruminococcaceae	0	13	0	5	25	1	71	156	656	123	71	0	5	69	0	0	386	76	0	142	15	85	0	221	107	195	0	160	0	112	161	62	0	0	23	213	0	0	0	21	20	128	133	0	0	1	88	66
OTU71	d__Bacteria; p__Firmicutes; c__Clostridia; o__Clostridiales; f__Ruminococcaceae	11	0	0	5	1	44	18	15	10	1	1	33	3	10	3	1	5	19	6	15	7	1	45	27	7	173	2	19	19	8	5	7	31	1	0	2	0	0	0	7	1	27	7	0	17	0	0	2
OTU81	d__Bacteria; p__Firmicutes; c__Clostridia; o__Clostridiales; f__Ruminococcaceae	1	0	0	0	6	0	0	187	0	1	18	780	2	6	0	0	2	0	0	321	1	0	0	1319	54	28	0	923	0	0	0	626	1	0	25	274	1	0	0	0	2	0	0	0	6	0	0	0
OTU110	d__Bacteria; p__Firmicutes; c__Clostridia; o__Clostridiales; f__Ruminococcaceae	0	6	0	6	7	1	7	60	110	18	0	55	0	3	38	0	28	0	0	16	1	35	0	0	4	85	0	1	0	0	163	30	0	0	0	4	40	0	0	7	13	135	11	0	1	0	0	6
OTU113	d__Bacteria; p__Firmicutes; c__Clostridia; o__Clostridiales; f__Ruminococcaceae	1	0	0	50	40	0	0	3	15	0	7	0	0	16	54	0	41	0	0	129	0	0	0	3	70	2	0	6	0	0	294	100	0	0	16	169	0	0	0	86	42	0	0	0	0	0	1	24
OTU117	d__Bacteria; p__Firmicutes; c__Clostridia; o__Clostridiales; f__Ruminococcaceae	0	0	0	0	10	0	0	0	186	68	1	0	1	19	0	0	285	0	0	353	1	0	0	0	116	1	0	120	0	0	0	214	0	0	33	349	0	0	0	0	22	0	0	0	0	0	3	64
OTU131	d__Bacteria; p__Firmicutes; c__Clostridia; o__Clostridiales; f__Ruminococcaceae	0	0	0	0	0	0	24	0	0	0	0	219	1	0	1	0	0	27	9	1	3	0	2	5	2	3	3	0	0	0	0	0	2	0	2	4	0	0	0	0	1	2	0	0	0	0	0	0
OTU138	d__Bacteria; p__Firmicutes; c__Clostridia; o__Clostridiales; f__Ruminococcaceae	10	0	0	9	4	0	6	5	11	7	1	23	0	8	9	0	15	6	1	2	0	13	0	9	4	7	1	17	0	8	2	9	9	0	0	0	26	0	0	5	10	29	14	0	1	1	1	2
OTU141	d__Bacteria; p__Firmicutes; c__Clostridia; o__Clostridiales; f__Ruminococcaceae	0	0	0	0	0	0	0	10	0	0	80	0	1	8	0	0	0	0	0	0	9	0	0	0	31	1	0	1	0	0	41	55	0	0	13	73	0	0	0	0	0	0	0	0	0	0	0	4
OTU142	d__Bacteria; p__Firmicutes; c__Clostridia; o__Clostridiales; f__Ruminococcaceae	23	13	0	0	5	0	24	12	16	1	6	1	0	50	0	0	8	4	0	13	0	12	34	8	6	0	7	45	0	0	3	36	32	0	10	25	0	0	0	0	12	25	25	0	3	0	1	10
OTU155	d__Bacteria; p__Firmicutes; c__Clostridia; o__Clostridiales; f__Ruminococcaceae	0	0	0	0	8	0	0	0	21	0	0	0	1	10	0	0	21	0	0	64	0	0	0	0	59	0	0	52	0	0	190	28	0	0	11	103	0	0	0	0	7	0	0	0	0	0	3	13
OTU162	d__Bacteria; p__Firmicutes; c__Clostridia; o__Clostridiales; f__Ruminococcaceae	0	0	0	6	0	59	0	0	0	1	0	0	1	0	0	0	0	0	0	0	0	0	0	0	0	0	0	0	0	32	0	0	0	0	0	0	0	0	0	6	0	0	0	0	0	0	0	0
OTU171	d__Bacteria; p__Firmicutes; c__Clostridia; o__Clostridiales; f__Ruminococcaceae	0	8	0	7	18	3	30	98	105	10	9	45	1	10	49	0	139	0	0	145	4	22	0	0	166	88	0	81	0	0	182	146	0	0	13	157	21	0	0	3	21	70	5	0	0	0	5	48
OTU186	d__Bacteria; p__Firmicutes; c__Clostridia; o__Clostridiales; f__Ruminococcaceae	0	28	0	0	8	0	6	70	0	8	0	0	0	14	1	0	3	0	0	13	31	0	0	29	6	142	0	139	0	4	0	0	0	0	1	5	0	0	0	0	8	4	0	0	0	0	0	8
OTU203	d__Bacteria; p__Firmicutes; c__Clostridia; o__Clostridiales; f__Ruminococcaceae	0	0	0	0	0	1	0	0	7	0	0	0	0	0	0	0	4	0	75	0	0	0	0	0	3	0	0	31	0	0	30	0	0	0	2	25	0	0	0	0	0	0	0	0	0	0	6	0
OTU209	d__Bacteria; p__Firmicutes; c__Clostridia; o__Clostridiales; f__Ruminococcaceae	0	5	0	0	20	0	0	10	61	172	72	0	1	4	19	0	50	0	0	24	6	0	0	0	256	133	0	114	0	0	6	182	0	0	30	320	0	0	0	0	28	0	0	0	0	0	28	283
OTU210	d__Bacteria; p__Firmicutes; c__Clostridia; o__Clostridiales; f__Ruminococcaceae	0	1	0	0	1	0	9	13	11	13	2	0	0	2	0	0	7	0	0	0	1	0	0	0	33	0	0	49	0	0	5	17	0	0	4	63	0	0	0	0	3	0	0	0	0	0	1	2
OTU225	d__Bacteria; p__Firmicutes; c__Clostridia; o__Clostridiales; f__Ruminococcaceae	0	0	0	0	0	0	0	0	0	0	1	0	0	0	0	0	0	0	0	0	0	0	0	0	339	0	0	0	0	0	0	0	0	0	0	0	0	0	0	0	0	0	0	0	0	0	0	0
OTU229	d__Bacteria; p__Firmicutes; c__Clostridia; o__Clostridiales; f__Ruminococcaceae	0	0	0	0	0	0	0	0	0	0	2	0	0	0	0	0	0	0	0	0	0	0	0	0	142	0	0	0	0	0	0	0	0	0	3	31	0	0	0	0	0	0	0	0	0	0	0	4
OTU231	d__Bacteria; p__Firmicutes; c__Clostridia; o__Clostridiales; f__Ruminococcaceae	0	0	0	0	2	0	0	1	0	12	10	31	0	3	2	0	5	0	0	0	2	0	0	21	7	1	0	19	0	1	11	2	0	0	1	0	0	0	0	0	0	0	1	0	0	0	0	2
OTU233	d__Bacteria; p__Firmicutes; c__Clostridia; o__Clostridiales; f__Ruminococcaceae	12	0	0	0	30	0	30	0	0	36	0	0	0	23	17	0	46	34	0	0	7	53	11	0	0	0	1	51	0	20	62	11	40	0	2	0	60	0	0	0	31	25	16	0	14	0	0	10
OTU250	d__Bacteria; p__Firmicutes; c__Clostridia; o__Clostridiales; f__Ruminococcaceae	0	3	0	0	5	0	6	0	6	0	17	1	0	0	8	0	0	0	0	1	0	3	0	1	4	0	0	6	0	0	4	2	0	0	0	1	0	0	0	0	5	1	0	0	6	0	5	0
OTU252	d__Bacteria; p__Firmicutes; c__Clostridia; o__Clostridiales; f__Ruminococcaceae	0	0	0	0	0	0	6	5	20	1	0	0	0	0	1	0	12	0	0	0	0	9	0	3	3	0	0	1	0	1	10	1	0	0	0	3	0	0	0	0	0	5	1	0	0	0	1	3
OTU266	d__Bacteria; p__Firmicutes; c__Clostridia; o__Clostridiales; f__Ruminococcaceae	1	0	0	4	0	14	2	5	2	0	2	12	0	1	1	0	0	3	6	1	1	0	8	2	4	8	1	9	15	6	0	2	0	0	0	0	0	0	0	4	0	6	1	0	1	0	1	0
OTU274	d__Bacteria; p__Firmicutes; c__Clostridia; o__Clostridiales; f__Ruminococcaceae	1	4	3	0	2	14	15	6	4	1	0	32	0	2	2	0	1	0	0	2	1	0	6	9	10	2	0	3	0	19	8	2	6	2	3	14	0	0	0	0	0	9	0	0	6	0	2	0
OTU276	d__Bacteria; p__Firmicutes; c__Clostridia; o__Clostridiales; f__Ruminococcaceae	36	8	0	0	1	0	22	9	3	0	1	39	0	15	11	0	4	0	0	4	10	14	0	22	3	30	0	25	0	32	5	26	22	0	0	0	0	0	0	0	10	0	5	0	0	2	0	5
OTU285	d__Bacteria; p__Firmicutes; c__Clostridia; o__Clostridiales; f__Ruminococcaceae	0	0	0	0	0	0	0	6	0	0	0	0	0	0	0	0	4	0	0	0	0	0	0	0	11	0	0	0	0	0	0	0	0	0	0	4	0	0	0	0	0	0	0	0	0	0	0	0
OTU312	d__Bacteria; p__Firmicutes; c__Clostridia; o__Clostridiales; f__Ruminococcaceae	0	0	0	0	0	0	11	0	0	0	0	7	0	8	0	0	0	0	0	2	0	0	0	1	0	3	0	18	0	0	1	1	3	0	0	0	0	0	0	0	0	34	0	0	0	0	1	0
OTU322	d__Bacteria; p__Firmicutes; c__Clostridia; o__Clostridiales; f__Ruminococcaceae	0	0	0	0	0	0	0	0	0	0	0	0	0	0	0	0	0	0	0	0	0	0	0	0	0	0	0	0	0	0	0	0	0	0	0	0	0	0	0	0	0	0	0	0	0	0	0	0
OTU338	d__Bacteria; p__Firmicutes; c__Clostridia; o__Clostridiales; f__Ruminococcaceae	0	0	0	0	0	0	0	0	0	0	0	0	0	2	0	0	0	0	0	0	0	0	0	0	0	0	0	0	0	0	0	7	0	0	15	125	0	0	0	0	0	0	0	0	0	0	0	0
OTU355	d__Bacteria; p__Firmicutes; c__Clostridia; o__Clostridiales; f__Ruminococcaceae	0	0	0	0	3	0	0	4	0	0	0	0	0	0	0	0	2	0	0	0	0	0	0	0	1	0	0	17	0	0	12	1	0	0	1	20	0	0	0	0	18	0	0	30	0	0	0	0
OTU365	d__Bacteria; p__Firmicutes; c__Clostridia; o__Clostridiales; f__Ruminococcaceae	0	0	0	0	1	0	0	0	11	0	13	0	1	3	1	0	51	0	0	6	0	0	0	0	6	10	0	1	0	0	65	9	0	0	0	0	0	0	0	0	3	0	0	1	0	1	22	9
OTU386	d__Bacteria; p__Firmicutes; c__Clostridia; o__Clostridiales; f__Ruminococcaceae	0	0	0	0	0	0	0	25	0	0	0	0	0	0	0	0	0	0	0	0	0	0	0	0	9	0	0	0	0	0	0	12	0	0	1	19	0	0	0	0	0	0	0	0	0	0	0	14
OTU387	d__Bacteria; p__Firmicutes; c__Clostridia; o__Clostridiales; f__Ruminococcaceae	0	0	0	0	0	0	5	5	1	0	0	22	0	0	0	0	1	0	0	0	1	0	0	1	3	2	0	17	0	0	0	0	0	0	0	1	26	0	0	0	0	6	0	0	0	0	0	0
OTU396	d__Bacteria; p__Firmicutes; c__Clostridia; o__Clostridiales; f__Ruminococcaceae	0	0	0	0	0	0	0	0	0	0	0	0	0	0	0	0	0	0	0	0	0	0	0	0	0	2	0	0	0	0	1	0	0	0	0	0	0	0	0	0	0	0	0	0	0	0	0	0
OTU404	d__Bacteria; p__Firmicutes; c__Clostridia; o__Clostridiales; f__Ruminococcaceae	0	1	0	1	7	1	0	32	6	4	13	8	2	8	10	0	39	0	0	77	0	0	0	0	79	14	0	12	0	0	0	54	0	0	50	441	6	0	0	1	5	22	1	0	0	0	3	17
OTU417	d__Bacteria; p__Firmicutes; c__Clostridia; o__Clostridiales; f__Ruminococcaceae	0	0	0	0	0	0	0	0	0	0	10	0	0	0	0	0	0	0	0	21	0	0	0	0	51	0	0	0	0	0	0	10	0	0	0	0	0	0	0	0	2	0	0	0	0	0	0	0
OTU424	d__Bacteria; p__Firmicutes; c__Clostridia; o__Clostridiales; f__Ruminococcaceae	0	0	0	0	0	0	0	0	0	0	0	0	0	0	0	0	0	0	0	0	0	0	0	0	0	0	0	0	0	0	0	6	0	0	6	80	0	0	0	0	0	0	0	0	0	0	1	0
OTU436	d__Bacteria; p__Firmicutes; c__Clostridia; o__Clostridiales; f__Ruminococcaceae	0	0	0	0	0	0	0	0	3	1	0	0	0	0	15	0	0	3	0	0	0	0	0	0	0	3	0	1	0	7	1	0	0	0	0	0	0	0	0	0	0	1	4	0	0	0	0	0
OTU458	d__Bacteria; p__Firmicutes; c__Clostridia; o__Clostridiales; f__Ruminococcaceae	0	0	0	0	0	0	0	0	0	0	15	0	0	0	0	0	0	0	0	0	0	0	0	0	0	0	0	0	0	0	0	0	0	0	9	67	0	0	0	0	0	0	0	0	0	0	1	0
OTU459	d__Bacteria; p__Firmicutes; c__Clostridia; o__Clostridiales; f__Ruminococcaceae	1	5	0	0	0	0	0	0	0	0	1	4	0	3	3	0	0	0	0	0	0	4	2	0	0	0	0	1	0	3	2	0	3	0	0	0	0	0	0	0	0	0	3	0	0	0	1	0
OTU461	d__Bacteria; p__Firmicutes; c__Clostridia; o__Clostridiales; f__Ruminococcaceae	0	0	0	0	1	0	0	0	0	0	0	0	0	0	0	0	27	0	0	5	0	0	0	0	13	0	0	5	0	0	0	5	0	0	0	0	0	0	0	0	0	0	0	0	0	0	4	2
OTU465	d__Bacteria; p__Firmicutes; c__Clostridia; o__Clostridiales; f__Ruminococcaceae	0	0	0	0	0	0	0	0	0	0	0	0	0	0	1	0	1	0	1	0	0	0	0	2	0	1	0	3	0	3	0	0	0	0	0	0	0	0	0	0	0	1	0	0	1	0	0	1
OTU470	d__Bacteria; p__Firmicutes; c__Clostridia; o__Clostridiales; f__Ruminococcaceae	0	0	0	0	0	0	11	0	8	1	0	0	0	0	1	0	0	0	0	13	0	0	0	0	0	2	0	0	0	0	8	0	4	0	0	0	0	0	0	0	0	0	0	0	0	0	2	1
OTU471	d__Bacteria; p__Firmicutes; c__Clostridia; o__Clostridiales; f__Ruminococcaceae	0	0	0	1	0	23	0	13	1	0	9	36	0	4	0	0	0	0	0	24	6	0	0	10	15	9	0	0	0	0	0	0	0	0	1	0	0	0	0	2	0	0	0	0	0	0	11	0
OTU472	d__Bacteria; p__Firmicutes; c__Clostridia; o__Clostridiales; f__Ruminococcaceae	0	0	0	0	0	0	0	0	0	0	0	0	0	0	0	0	0	0	0	0	0	0	0	0	46	0	0	0	0	0	0	17	0	0	0	0	0	0	0	0	0	0	0	0	0	0	0	0
OTU478	d__Bacteria; p__Firmicutes; c__Clostridia; o__Clostridiales; f__Ruminococcaceae	0	0	0	0	0	0	0	4	12	0	0	1	1	0	0	0	7	0	0	1	0	0	0	3	1	1	0	1	0	0	1	0	0	0	0	1	0	0	0	0	0	4	0	0	0	0	0	4
OTU489	d__Bacteria; p__Firmicutes; c__Clostridia; o__Clostridiales; f__Ruminococcaceae	0	0	0	0	3	0	0	0	4	0	4	0	1	7	0	0	0	0	0	4	0	0	0	0	0	0	0	1	0	0	0	4	0	0	3	29	0	0	0	0	1	0	0	0	0	0	0	1
OTU490	d__Bacteria; p__Firmicutes; c__Clostridia; o__Clostridiales; f__Ruminococcaceae	0	0	0	1	2	0	0	6	10	0	2	0	0	3	0	0	6	0	1	2	0	0	0	3	6	8	0	17	0	0	0	1	0	0	0	4	0	0	0	3	0	0	3	0	0	0	0	4
OTU493	d__Bacteria; p__Firmicutes; c__Clostridia; o__Clostridiales; f__Ruminococcaceae	0	0	0	0	0	0	0	0	0	0	0	0	0	0	0	0	0	0	0	0	0	0	0	0	0	0	0	0	0	0	0	0	0	0	0	0	0	0	0	0	0	0	0	0	0	0	0	0
OTU500	d__Bacteria; p__Firmicutes; c__Clostridia; o__Clostridiales; f__Ruminococcaceae	0	0	0	0	1	0	0	0	2	0	1	0	0	0	1	0	1	0	0	3	0	0	0	0	3	2	0	1	0	0	0	3	0	0	0	7	0	0	0	0	1	0	0	0	0	0	0	0
OTU503	d__Bacteria; p__Firmicutes; c__Clostridia; o__Clostridiales; f__Ruminococcaceae	0	0	0	0	0	0	1	0	2	0	0	0	0	0	0	0	1	0	0	1	0	0	0	0	1	0	0	0	0	0	0	1	0	0	0	0	0	0	0	0	0	0	0	0	0	0	0	1
OTU509	d__Bacteria; p__Firmicutes; c__Clostridia; o__Clostridiales; f__Ruminococcaceae	0	0	0	0	0	0	0	0	0	0	0	0	0	0	0	0	0	0	0	0	0	0	0	0	0	0	0	0	0	0	0	0	0	0	0	0	0	0	0	0	0	0	0	0	0	0	0	0
OTU518	d__Bacteria; p__Firmicutes; c__Clostridia; o__Clostridiales; f__Ruminococcaceae	0	0	0	0	0	0	0	0	0	0	0	0	0	0	0	0	0	1	0	0	0	0	0	0	0	1	0	1	0	0	0	0	6	0	0	0	0	0	0	3	0	0	1	0	2	0	0	0
OTU522	d__Bacteria; p__Firmicutes; c__Clostridia; o__Clostridiales; f__Ruminococcaceae	0	0	0	0	0	0	0	0	0	0	0	0	0	0	0	0	0	0	0	0	0	0	0	0	43	0	0	0	0	0	0	0	0	0	1	18	0	0	0	0	0	0	0	0	0	0	0	0
OTU525	d__Bacteria; p__Firmicutes; c__Clostridia; o__Clostridiales; f__Ruminococcaceae	0	0	0	0	0	0	0	0	0	0	3	0	0	0	0	0	29	0	0	0	0	0	0	0	0	0	0	0	0	0	0	0	0	0	2	32	0	0	0	0	0	0	0	0	0	0	1	0
OTU529	d__Bacteria; p__Firmicutes; c__Clostridia; o__Clostridiales; f__Ruminococcaceae	0	0	0	0	0	0	0	0	0	0	0	0	0	0	0	0	0	0	0	0	0	0	0	0	0	0	0	0	0	0	0	0	0	0	0	0	0	0	0	0	0	0	0	0	0	0	0	0
OTU531	d__Bacteria; p__Firmicutes; c__Clostridia; o__Clostridiales; f__Ruminococcaceae	0	0	0	0	0	0	0	0	0	0	0	0	0	0	0	0	0	0	0	0	0	0	0	0	192	0	0	0	0	0	0	0	0	0	0	0	0	0	0	0	0	0	0	0	0	0	0	0
OTU532	d__Bacteria; p__Firmicutes; c__Clostridia; o__Clostridiales; f__Ruminococcaceae	0	0	0	0	0	0	0	0	2	0	0	0	0	0	0	0	0	0	0	0	0	0	0	0	0	0	0	0	0	0	0	0	0	0	0	0	0	0	0	0	0	0	0	0	0	0	0	0
OTU534	d__Bacteria; p__Firmicutes; c__Clostridia; o__Clostridiales; f__Ruminococcaceae	0	0	0	0	0	0	0	0	0	0	0	0	0	0	0	0	0	0	0	0	0	0	0	0	1	0	0	0	0	0	0	0	0	0	3	18	0	0	0	0	0	0	0	0	0	0	0	0
OTU555	d__Bacteria; p__Firmicutes; c__Clostridia; o__Clostridiales; f__Ruminococcaceae	0	0	0	0	0	0	0	0	0	0	0	0	0	0	0	0	0	0	0	0	1	0	0	0	1	0	0	1	0	0	1	0	0	0	0	0	0	0	0	0	0	0	0	0	0	0	0	0
OTU568	d__Bacteria; p__Firmicutes; c__Clostridia; o__Clostridiales; f__Ruminococcaceae	0	0	0	0	0	0	20	0	34	1	2	0	0	2	0	0	0	0	0	2	0	0	0	0	0	0	0	1	0	0	0	1	0	0	3	21	0	0	0	0	0	0	0	0	0	0	1	2
OTU569	d__Bacteria; p__Firmicutes; c__Clostridia; o__Clostridiales; f__Ruminococcaceae	0	0	0	0	0	0	0	0	0	0	1	0	0	3	0	0	1	0	0	0	0	0	0	0	5	0	0	0	0	0	0	0	0	0	0	0	0	0	0	0	0	0	0	0	0	0	0	0
OTU587	d__Bacteria; p__Firmicutes; c__Clostridia; o__Clostridiales; f__Ruminococcaceae	0	0	0	0	0	0	3	0	2	0	0	0	0	1	0	0	0	0	0	0	0	0	0	0	1	1	0	2	0	1	3	3	0	0	0	0	0	0	0	0	1	0	0	0	0	0	0	3
OTU597	d__Bacteria; p__Firmicutes; c__Clostridia; o__Clostridiales; f__Ruminococcaceae	0	0	0	0	0	0	0	0	0	0	0	0	0	0	0	0	0	0	0	0	0	0	0	0	0	0	0	0	0	0	0	0	0	0	0	29	0	0	0	0	0	0	0	0	0	0	0	0
OTU92	d__Bacteria; p__Firmicutes; c__Clostridia; o__Clostridiales; f__Peptostreptococcaceae; g__Romboutsia	3	5	41	11	14	90	17	16	5	46	50	1	91	18	0	330	4	15	133	1	47	0	5	2	14	35	40	20	39	65	0	37	12	116	28	29	42	47	201	9	19	9	8	9	49	819	179	2
OTU480	d__Bacteria; p__Firmicutes; c__Clostridia; o__Clostridiales; f__Peptostreptococcaceae; g__Peptostreptococcus	0	0	2	1	0	1	0	0	0	0	1	0	1	0	0	2	0	0	0	0	1	0	0	0	0	0	0	0	1	1	0	0	0	0	0	0	1	0	0	1	0	0	0	0	0	1	0	0
OTU102	d__Bacteria; p__Firmicutes; c__Clostridia; o__Clostridiales; f__Peptostreptococcaceae; g__Intestinibacter	1	0	26	42	10	29	6	22	0	24	19	3	57	13	0	5	0	28	1	2	4	2	22	0	7	14	17	13	132	37	0	3	7	11	2	3	13	54	5	45	6	22	1	8	1	9	3	2
OTU317	d__Bacteria; p__Firmicutes; c__Clostridia; o__Clostridiales; f__Peptostreptococcaceae; g__Clostridium_XI	0	0	0	0	0	0	0	0	0	0	0	0	0	0	0	0	0	0	0	0	0	0	2	0	0	0	0	0	2	1	0	0	0	0	0	0	0	0	0	0	0	0	0	0	0	0	0	0
OTU39	d__Bacteria; p__Firmicutes; c__Clostridia; o__Clostridiales; f__Lachnospiraceae; g__Ruminococcus2	19	158	29	547	192	91	52	28	21	52	142	15	22	114	2	12	440	14	111	24	406	151	72	46	152	27	97	411	38	403	203	61	40	30	335	100	128	54	82	1192	195	9	15	3	522	797	305	59
OTU106	d__Bacteria; p__Firmicutes; c__Clostridia; o__Clostridiales; f__Lachnospiraceae; g__Ruminococcus2	1	55	3	9	177	185	298	39	240	132	135	1	8	94	355	3	110	56	173	147	126	205	0	0	36	22	33	85	3	4	32	71	5	2	235	19	162	2	0	11	136	178	27	26	8	64	336	13
OTU127	d__Bacteria; p__Firmicutes; c__Clostridia; o__Clostridiales; f__Lachnospiraceae; g__Ruminococcus2	138	40	18	252	104	99	32	199	133	155	18	429	22	134	10	8	365	116	56	41	229	113	28	714	171	322	33	123	58	430	231	45	274	33	114	29	152	42	30	449	141	193	31	9	712	231	108	32
OTU7	d__Bacteria; p__Firmicutes; c__Clostridia; o__Clostridiales; f__Lachnospiraceae; g__Roseburia	480	1038	4	14	2189	2104	1997	814	8042	1367	627	0	29	328	2662	2415	2041	1146	1444	714	1621	4341	812	588	1031	668	607	1117	2644	1762	25	847	965	1	2322	497	7216	2	221	29	2759	4640	1	1231	2122	14	385	354
OTU12	d__Bacteria; p__Firmicutes; c__Clostridia; o__Clostridiales; f__Lachnospiraceae; g__Roseburia	153	0	0	276	1	629	183	122	350	1099	214	296	5	471	495	891	255	30	207	177	1922	160	11	145	478	185	762	217	3206	145	10	147	302	0	696	170	830	1	165	253	4	510	464	2097	712	742	610	28
OTU573	d__Bacteria; p__Firmicutes; c__Clostridia; o__Clostridiales; f__Lachnospiraceae; g__Roseburia	58	0	0	0	0	10	1	2	2	69	5	0	1	1	161	179	43	0	44	20	98	40	1	0	25	17	212	62	968	31	2	0	95	0	7	27	10	0	27	0	0	74	0	333	26	0	160	12
OTU596	d__Bacteria; p__Firmicutes; c__Clostridia; o__Clostridiales; f__Lachnospiraceae; g__Lactonifactor	0	0	0	0	0	2	0	3	1	2	0	7	2	0	0	0	0	0	0	0	0	0	1	0	0	0	0	0	1	0	0	0	0	0	0	0	1	0	0	0	0	1	0	0	0	0	0	0
OTU11	d__Bacteria; p__Firmicutes; c__Clostridia; o__Clostridiales; f__Lachnospiraceae; g__Lachnospiracea_incertae_sedis	64	10	251	302	21	568	221	179	17	21	19	27	1274	168	294	6191	146	285	13	351	150	160	1348	112	83	197	42	94	244	107	3	274	117	0	76	62	436	423	11	972	23	244	0	1011	12	743	16	60
OTU13	d__Bacteria; p__Firmicutes; c__Clostridia; o__Clostridiales; f__Lachnospiraceae; g__Lachnospiracea_incertae_sedis	148	35	1946	101	0	117	0	18	0	4	1	802	1317	2	121	132	12	24	2475	1	10	5	104	0	0	3	5	131	1353	109	5	2	258	1956	4	0	74	3204	0	227	0	234	18	1196	353	91	12	2
OTU21	d__Bacteria; p__Firmicutes; c__Clostridia; o__Clostridiales; f__Lachnospiraceae; g__Lachnospiracea_incertae_sedis	514	707	215	8	39	22	117	14	10	592	44	0	66	30	7	273	123	79	1687	159	98	479	73	71	383	234	508	417	830	1094	7	168	1064	0	550	386	800	236	1	32	46	1258	0	326	459	128	10	38
OTU23	d__Bacteria; p__Firmicutes; c__Clostridia; o__Clostridiales; f__Lachnospiraceae; g__Lachnospiracea_incertae_sedis	1730	0	0	1	1362	2102	0	114	2	1130	143	682	6	44	407	0	774	236	0	0	37	2343	0	17	332	288	300	223	0	1571	0	380	3572	0	354	3590	13	1	1	2	1719	346	700	2	0	1	79	194
OTU30	d__Bacteria; p__Firmicutes; c__Clostridia; o__Clostridiales; f__Lachnospiraceae; g__Lachnospiracea_incertae_sedis	0	0	0	0	0	0	1142	163	1138	606	19	0	1	200	0	0	0	320	0	0	29	1426	0	0	128	0	0	106	0	1	0	28	1	0	379	3671	0	0	0	0	0	0	0	1	0	9	932	13
OTU62	d__Bacteria; p__Firmicutes; c__Clostridia; o__Clostridiales; f__Lachnospiraceae; g__Lachnospiracea_incertae_sedis	0	16	0	9	104	43	91	84	178	129	118	9	1	135	108	18	20	135	120	37	84	259	64	19	49	186	8	18	257	224	31	6	0	0	23	12	1087	2	0	12	134	43	326	0	80	2	34	69
OTU87	d__Bacteria; p__Firmicutes; c__Clostridia; o__Clostridiales; f__Lachnospiraceae; g__Lachnospiracea_incertae_sedis	127	12	0	10	76	76	303	49	139	44	44	55	0	11	191	5	97	9	18	123	16	191	0	32	29	18	15	83	0	36	49	82	149	2	86	101	23	1	5	10	79	92	91	282	11	10	156	23
OTU91	d__Bacteria; p__Firmicutes; c__Clostridia; o__Clostridiales; f__Lachnospiraceae; g__Lachnospiracea_incertae_sedis	42	61	0	76	231	61	77	36	201	107	159	66	4	77	282	80	79	175	0	47	41	208	65	17	33	42	13	62	187	83	93	28	99	0	221	44	221	0	18	105	212	47	53	0	68	113	145	50
OTU105	d__Bacteria; p__Firmicutes; c__Clostridia; o__Clostridiales; f__Lachnospiraceae; g__Lachnospiracea_incertae_sedis	34	110	0	332	92	21	25	28	70	129	48	0	75	23	131	2	39	255	0	32	18	305	53	9	45	8	45	31	14	104	31	6	100	0	40	29	152	0	0	347	128	24	1	5	168	3	55	19
OTU119	d__Bacteria; p__Firmicutes; c__Clostridia; o__Clostridiales; f__Lachnospiraceae; g__Lachnospiracea_incertae_sedis	0	0	0	0	0	0	0	0	155	243	0	0	1	0	0	0	141	97	0	11	0	2	0	0	29	0	0	0	0	0	0	0	0	0	4	29	91	0	0	0	0	35	0	0	0	1	70	89
OTU445	d__Bacteria; p__Firmicutes; c__Clostridia; o__Clostridiales; f__Lachnospiraceae; g__Lachnospiracea_incertae_sedis	1	0	0	0	0	0	0	0	0	0	0	0	0	0	0	0	0	0	0	0	0	0	0	0	0	0	0	4	0	0	4	19	6	0	4	9	0	0	0	0	0	0	0	0	0	0	1	0
OTU582	d__Bacteria; p__Firmicutes; c__Clostridia; o__Clostridiales; f__Lachnospiraceae; g__Lachnoanaerobaculum	0	0	0	0	0	0	0	0	0	0	0	0	0	0	0	0	0	0	0	0	0	0	0	0	0	0	0	0	0	0	0	0	0	0	0	0	0	0	0	0	1	1	0	0	0	0	0	0
OTU399	d__Bacteria; p__Firmicutes; c__Clostridia; o__Clostridiales; f__Lachnospiraceae; g__Howardella	0	0	0	0	0	0	0	0	0	0	0	0	0	0	0	0	0	0	0	0	0	0	0	0	14	0	0	6	0	0	0	0	0	0	31	12	0	0	0	0	0	0	0	0	0	17	0	0
OTU32	d__Bacteria; p__Firmicutes; c__Clostridia; o__Clostridiales; f__Lachnospiraceae; g__Fusicatenibacter	162	46	3	144	474	127	379	34	319	225	363	298	590	128	568	216	163	69	155	77	73	426	176	20	95	74	142	117	311	451	237	116	317	0	764	73	1161	4	42	221	433	179	0	0	136	27	80	123
OTU240	d__Bacteria; p__Firmicutes; c__Clostridia; o__Clostridiales; f__Lachnospiraceae; g__Eisenbergiella	2	0	2	5	0	2	8	5	0	1	0	3	1	0	10	0	1	12	1	1	1	0	26	3	4	77	0	1	0	0	63	0	7	4	0	0	0	0	0	6	0	2	2	1	1	2	0	0
OTU45	d__Bacteria; p__Firmicutes; c__Clostridia; o__Clostridiales; f__Lachnospiraceae; g__Dorea	249	81	55	137	138	272	97	93	112	112	124	5	41	265	205	139	162	68	469	44	160	204	187	85	41	33	72	384	205	154	126	133	456	11	428	88	283	108	27	276	131	187	86	3	185	167	163	109
OTU93	d__Bacteria; p__Firmicutes; c__Clostridia; o__Clostridiales; f__Lachnospiraceae; g__Dorea	0	16	0	130	116	177	42	63	54	107	115	0	19	126	151	40	100	64	108	50	80	109	65	31	24	16	24	65	149	0	110	36	0	0	84	46	0	0	21	198	132	57	82	1	163	138	133	44
OTU95	d__Bacteria; p__Firmicutes; c__Clostridia; o__Clostridiales; f__Lachnospiraceae; g__Dorea	22	2	314	1	3	2	3	0	4	2	0	32	133	2	4	0	3	6	210	0	0	3	6	2	7	5	1	11	161	16	19	2	50	586	3	6	21	497	3	2	5	2	8	143	0	1	6	1
OTU372	d__Bacteria; p__Firmicutes; c__Clostridia; o__Clostridiales; f__Lachnospiraceae; g__Dorea	0	0	1	0	0	0	0	0	0	0	0	0	0	0	0	0	0	0	0	0	0	1	0	0	0	0	0	0	0	0	0	0	0	0	1	0	0	0	0	0	0	1	0	1	0	0	0	0
OTU50	d__Bacteria; p__Firmicutes; c__Clostridia; o__Clostridiales; f__Lachnospiraceae; g__Coprococcus	0	0	0	0	0	0	0	0	1	594	617	0	2	140	1675	0	0	0	0	0	176	0	0	0	642	0	1	332	0	0	94	666	0	0	0	1	0	0	0	0	0	0	0	0	0	0	0	41
OTU169	d__Bacteria; p__Firmicutes; c__Clostridia; o__Clostridiales; f__Lachnospiraceae; g__Coprococcus	0	0	0	21	0	0	36	6	34	16	77	14	0	7	43	8	18	0	0	13	21	50	19	12	11	0	32	28	59	0	9	18	0	0	72	17	0	0	4	40	0	18	0	0	42	15	16	9
OTU466	d__Bacteria; p__Firmicutes; c__Clostridia; o__Clostridiales; f__Lachnospiraceae; g__Coprococcus	0	0	0	0	1	0	0	61	0	143	262	22	2	56	426	0	0	0	0	0	28	0	0	0	243	258	0	136	0	0	27	234	0	0	2	3	0	0	0	0	0	0	0	0	0	2	235	334
OTU48	d__Bacteria; p__Firmicutes; c__Clostridia; o__Clostridiales; f__Lachnospiraceae; g__Clostridium_XlVb	0	125	0	0	0	1	59	15	118	5	0	0	51	14	1	363	0	373	276	0	1	224	37	13	3	0	80	0	0	0	1	0	0	0	42	0	193	1	0	0	0	62	0	1051	132	4	497	0
OTU133	d__Bacteria; p__Firmicutes; c__Clostridia; o__Clostridiales; f__Lachnospiraceae; g__Clostridium_XlVb	1	18	0	103	20	0	67	16	47	56	10	118	2	62	92	0	65	36	58	154	44	63	0	58	4	16	11	10	0	45	24	29	0	0	18	77	17	0	0	78	27	54	39	0	56	0	41	18
OTU244	d__Bacteria; p__Firmicutes; c__Clostridia; o__Clostridiales; f__Lachnospiraceae; g__Clostridium_XlVb	14	7	0	33	2	5	8	3	2	12	4	2	1	7	1	11	1	9	0	6	5	10	0	4	0	10	6	0	0	5	0	3	16	1	7	13	0	0	2	30	3	5	0	0	3	7	2	0
OTU256	d__Bacteria; p__Firmicutes; c__Clostridia; o__Clostridiales; f__Lachnospiraceae; g__Clostridium_XlVb	0	0	0	10	12	3	9	0	1	2	0	0	5	0	3	0	0	7	0	0	0	0	0	3	0	2	0	8	0	5	20	0	0	0	0	0	0	0	0	5	4	0	8	0	0	0	1	0
OTU307	d__Bacteria; p__Firmicutes; c__Clostridia; o__Clostridiales; f__Lachnospiraceae; g__Clostridium_XlVb	0	0	4	5	0	6	1	0	0	0	0	0	7	0	0	0	0	0	0	0	0	0	0	0	0	0	0	0	0	4	0	0	0	0	0	0	7	5	0	4	0	5	4	6	1	4	0	0
OTU340	d__Bacteria; p__Firmicutes; c__Clostridia; o__Clostridiales; f__Lachnospiraceae; g__Clostridium_XlVb	0	0	0	4	0	0	0	6	11	0	5	0	2	8	0	0	9	0	0	16	0	3	0	0	1	2	2	1	0	0	0	10	0	0	4	13	0	0	0	1	0	0	0	0	1	0	1	0
OTU364	d__Bacteria; p__Firmicutes; c__Clostridia; o__Clostridiales; f__Lachnospiraceae; g__Clostridium_XlVb	0	0	1	0	0	0	0	0	0	1	0	2	1	0	0	0	0	0	0	0	0	0	2	0	0	1	0	1	0	2	0	0	0	1	0	0	0	0	0	0	0	0	0	0	0	2	0	0
OTU376	d__Bacteria; p__Firmicutes; c__Clostridia; o__Clostridiales; f__Lachnospiraceae; g__Clostridium_XlVb	0	0	0	0	0	0	0	0	0	0	0	0	0	0	0	0	0	0	2	0	0	0	23	0	0	0	0	0	0	0	0	0	0	0	0	0	0	0	0	0	0	0	0	0	0	0	0	0
OTU419	d__Bacteria; p__Firmicutes; c__Clostridia; o__Clostridiales; f__Lachnospiraceae; g__Clostridium_XlVb	7	0	0	1	3	2	9	3	2	0	15	1	0	3	3	0	4	0	0	7	5	0	0	1	2	6	21	7	0	0	0	14	12	1	0	16	0	0	5	4	2	6	3	0	10	0	4	2
OTU27	d__Bacteria; p__Firmicutes; c__Clostridia; o__Clostridiales; f__Lachnospiraceae; g__Clostridium_XlVa	15	21	15	43	3	39	16	26	5	8	0	148	39	2	8	3	3	16	54	3	10	4	11	25	3	24	2	3	87	43	5	1	32	296	0	2	50	32	1	24	4	12	18	123	28	0	2	1
OTU31	d__Bacteria; p__Firmicutes; c__Clostridia; o__Clostridiales; f__Lachnospiraceae; g__Clostridium_XlVa	76	97	115	398	164	78	202	89	148	87	147	14	309	160	186	146	138	104	213	84	63	177	156	196	95	75	283	76	0	266	41	108	153	886	164	236	6	213	31	412	189	138	21	104	191	165	150	52
OTU212	d__Bacteria; p__Firmicutes; c__Clostridia; o__Clostridiales; f__Lachnospiraceae; g__Clostridium_XlVa	11	0	3	12	0	7	6	3	0	1	1	61	2	0	1	4	1	3	3	1	1	1	109	6	1	5	0	0	24	14	15	0	16	59	0	0	17	21	0	14	0	3	9	1	5	0	0	0
OTU381	d__Bacteria; p__Firmicutes; c__Clostridia; o__Clostridiales; f__Lachnospiraceae; g__Clostridium_XlVa	2	1	1	1	12	2	0	6	14	0	34	2	0	1	4	0	58	0	0	0	0	23	0	63	189	0	0	11	0	0	2	5	2	0	7	15	5	0	0	0	11	1	1	0	0	0	2	12
OTU397	d__Bacteria; p__Firmicutes; c__Clostridia; o__Clostridiales; f__Lachnospiraceae; g__Clostridium_XlVa	2	2	7	10	2	24	2	6	1	4	0	6	36	2	1	11	0	4	13	1	4	3	6	2	2	1	5	4	3	1	0	1	2	21	2	0	5	18	6	19	1	3	1	11	8	0	5	0
OTU488	d__Bacteria; p__Firmicutes; c__Clostridia; o__Clostridiales; f__Lachnospiraceae; g__Clostridium_XlVa	2	0	27	1	4	3	2	3	5	5	2	16	1	3	0	4	0	2	2	4	2	1	0	3	6	4	0	5	9	5	3	7	12	2	0	6	4	81	0	4	6	6	2	2	41	7	3	0
OTU415	d__Bacteria; p__Firmicutes; c__Clostridia; o__Clostridiales; f__Lachnospiraceae; g__Cellulosilyticum	0	0	0	0	0	0	0	0	0	0	0	0	0	0	0	0	0	0	0	0	0	0	0	0	0	0	0	0	0	0	0	0	0	0	0	0	0	0	0	0	0	0	0	0	0	0	0	0
OTU8	d__Bacteria; p__Firmicutes; c__Clostridia; o__Clostridiales; f__Lachnospiraceae; g__Blautia	90	314	856	413	1217	247	111	106	397	361	738	465	484	285	1407	411	257	326	386	51	198	1015	171	83	70	66	102	99	818	561	126	81	282	1971	809	72	391	1462	171	455	1085	108	336	1744	194	332	247	68
OTU44	d__Bacteria; p__Firmicutes; c__Clostridia; o__Clostridiales; f__Lachnospiraceae; g__Blautia	199	79	75	23	148	184	150	73	324	144	937	60	22	28	456	54	109	353	101	68	305	514	67	43	45	63	91	76	100	22	162	20	521	73	85	51	902	88	20	41	134	34	183	4	82	96	223	21
OTU51	d__Bacteria; p__Firmicutes; c__Clostridia; o__Clostridiales; f__Lachnospiraceae; g__Blautia	55	48	20	12	205	52	86	47	91	94	171	156	13	12	160	22	103	100	84	60	67	255	32	30	63	36	13	53	33	41	95	36	127	197	74	41	127	38	5	29	200	57	34	28	93	42	158	15
OTU109	d__Bacteria; p__Firmicutes; c__Clostridia; o__Clostridiales; f__Lachnospiraceae; g__Blautia	1	1	1010	6	7	5	4	0	11	6	29	76	7	3	3	7	14	19	1	2	6	7	21	0	2	1	4	8	87	17	1	0	8	30	49	2	12	1803	3	7	7	0	1	7	9	18	7	1
OTU121	d__Bacteria; p__Firmicutes; c__Clostridia; o__Clostridiales; f__Lachnospiraceae; g__Blautia	10	7	137	27	63	74	40	10	108	52	284	25	66	39	21	117	133	134	50	8	10	167	13	2	5	5	30	61	188	41	13	4	22	430	719	24	128	243	15	50	59	4	12	86	50	132	98	3
OTU156	d__Bacteria; p__Firmicutes; c__Clostridia; o__Clostridiales; f__Lachnospiraceae; g__Blautia	12	23	17	102	133	57	64	46	232	48	359	6	4	120	70	94	113	94	10	51	76	188	211	23	54	20	29	115	6	36	64	57	33	34	313	65	91	31	53	179	116	42	246	4	54	50	120	27
OTU58	d__Bacteria; p__Firmicutes; c__Clostridia; o__Clostridiales; f__Lachnospiraceae; g__Anaerostipes	86	65	376	151	321	80	132	14	117	120	384	32	162	82	307	722	137	150	93	24	34	269	227	6	4	23	42	30	386	241	22	52	214	0	1580	14	183	414	32	282	354	344	86	0	13	79	70	106
OTU215	d__Bacteria; p__Firmicutes; c__Clostridia; o__Clostridiales; f__Lachnospiraceae; g__Anaerostipes	0	0	14	0	0	0	0	0	0	1	0	2	1	0	0	0	1	1	1	0	0	0	7	0	0	0	0	0	10	0	0	0	2	38	0	0	0	12	0	1	0	0	0	38	0	0	0	0
OTU521	d__Bacteria; p__Firmicutes; c__Clostridia; o__Clostridiales; f__Lachnospiraceae; g__Acetatifactor	1	4	7	0	0	0	0	0	0	0	0	6	1	0	0	0	0	0	1	0	0	0	2	0	0	0	0	0	0	0	0	0	0	8	0	0	0	0	0	0	0	0	0	0	1	0	0	0
OTU16	d__Bacteria; p__Firmicutes; c__Clostridia; o__Clostridiales; f__Lachnospiraceae	119	377	264	1624	110	225	165	98	78	118	66	39	1080	127	104	306	29	352	558	124	56	159	615	290	94	54	823	44	0	0	3	44	187	1	135	157	195	478	183	2053	155	198	32	0	515	81	178	18
OTU37	d__Bacteria; p__Firmicutes; c__Clostridia; o__Clostridiales; f__Lachnospiraceae	0	0	1	2	206	28	140	17	85	682	976	2	7	19	394	6	25	13	16	514	16	249	16	51	127	195	33	146	0	50	161	30	1	142	50	477	35	0	3	0	341	64	15	488	11	0	16	19
OTU38	d__Bacteria; p__Firmicutes; c__Clostridia; o__Clostridiales; f__Lachnospiraceae	121	104	721	143	64	164	104	199	86	120	143	793	113	47	2	198	48	33	1	46	123	279	101	91	71	28	96	57	273	311	65	31	279	0	191	24	311	967	6	238	70	47	75	118	32	36	48	39
OTU64	d__Bacteria; p__Firmicutes; c__Clostridia; o__Clostridiales; f__Lachnospiraceae	84	89	49	223	75	87	137	48	73	114	47	6	559	89	73	423	64	108	263	70	25	156	132	130	182	44	520	29	0	144	10	72	158	466	150	159	99	67	110	214	90	25	0	186	152	149	93	24
OTU67	d__Bacteria; p__Firmicutes; c__Clostridia; o__Clostridiales; f__Lachnospiraceae	0	8	0	5	459	0	72	11	273	596	210	51	7	140	179	1	381	19	0	190	8	237	18	0	54	87	33	107	0	79	50	26	0	0	19	19	28	0	2	6	484	70	95	0	15	3	150	219
OTU82	d__Bacteria; p__Firmicutes; c__Clostridia; o__Clostridiales; f__Lachnospiraceae	145	59	1	169	80	353	104	68	134	138	97	244	199	179	88	133	92	37	50	121	144	118	274	195	45	32	171	14	232	171	12	90	288	0	134	171	0	0	62	165	101	48	97	1	27	157	119	30
OTU86	d__Bacteria; p__Firmicutes; c__Clostridia; o__Clostridiales; f__Lachnospiraceae	0	0	0	0	0	0	0	0	0	229	0	0	0	0	0	0	31	0	0	0	0	0	0	0	0	0	0	0	0	0	0	33	0	0	0	0	0	0	0	0	0	0	0	0	0	0	0	0
OTU104	d__Bacteria; p__Firmicutes; c__Clostridia; o__Clostridiales; f__Lachnospiraceae	151	0	0	0	231	2	28	8	793	384	12	0	0	6	14	4	136	0	1	135	28	375	0	1	42	18	3	10	6	1	0	2	318	0	13	75	3	0	1	0	330	18	0	44	2	0	15	22
OTU118	d__Bacteria; p__Firmicutes; c__Clostridia; o__Clostridiales; f__Lachnospiraceae	0	0	0	0	0	1	0	0	0	217	1	0	0	0	0	0	36	0	0	0	0	0	0	0	3	1	0	0	0	7	1	0	0	0	438	2	367	0	0	0	2	0	0	0	0	0	0	0
OTU123	d__Bacteria; p__Firmicutes; c__Clostridia; o__Clostridiales; f__Lachnospiraceae	6	3	2	11	0	13	2	1	1	0	0	75	0	2	1	1	5	6	2	0	3	3	4	0	0	1	1	0	1	1	6	0	20	9	0	2	32	5	0	9	2	4	3	0	2	0	1	0
OTU150	d__Bacteria; p__Firmicutes; c__Clostridia; o__Clostridiales; f__Lachnospiraceae	0	0	0	0	15	0	16	17	0	0	94	154	0	0	0	0	141	0	0	0	24	178	0	0	23	97	0	32	0	0	0	3	0	0	13	0	0	0	0	0	21	0	0	0	0	1	47	9
OTU159	d__Bacteria; p__Firmicutes; c__Clostridia; o__Clostridiales; f__Lachnospiraceae	71	0	1	3	3	0	21	58	7	1	9	0	2	1	5	3	0	11	2	7	9	1	1	1	17	26	8	45	0	2	0	2	117	3	1	1	132	6	1	4	5	49	0	0	41	0	1	0
OTU173	d__Bacteria; p__Firmicutes; c__Clostridia; o__Clostridiales; f__Lachnospiraceae	12	2	0	0	10	199	15	44	23	39	90	0	1	12	359	26	34	11	251	20	45	23	25	4	101	4	151	9	35	37	3	13	30	0	39	47	40	0	3	0	12	82	22	33	0	1	145	41
OTU183	d__Bacteria; p__Firmicutes; c__Clostridia; o__Clostridiales; f__Lachnospiraceae	0	6	0	2	27	6	13	2	60	40	135	3	2	18	0	10	13	0	0	12	20	23	8	7	11	6	1	14	0	0	25	11	0	0	35	13	27	0	1	4	18	6	19	0	6	4	58	3
OTU185	d__Bacteria; p__Firmicutes; c__Clostridia; o__Clostridiales; f__Lachnospiraceae	38	3	0	0	22	55	17	45	31	96	1985	0	0	24	29	98	18	162	140	9	75	61	71	27	44	13	23	3	103	150	1	36	74	0	59	10	176	0	7	0	29	25	0	68	7	0	1	13
OTU188	d__Bacteria; p__Firmicutes; c__Clostridia; o__Clostridiales; f__Lachnospiraceae	3	1	35	17	0	10	6	5	2	7	1	1	17	0	6	0	1	2	5	1	1	1	11	6	39	29	1	1	7	1	1	0	16	30	2	3	9	57	0	12	2	13	0	9	2	0	3	0
OTU200	d__Bacteria; p__Firmicutes; c__Clostridia; o__Clostridiales; f__Lachnospiraceae	0	0	0	0	0	0	0	0	0	0	502	0	0	0	0	0	0	0	0	0	0	0	0	0	0	0	0	0	0	0	0	0	0	0	0	0	0	0	0	0	0	0	0	0	0	0	0	0
OTU201	d__Bacteria; p__Firmicutes; c__Clostridia; o__Clostridiales; f__Lachnospiraceae	1	14	0	0	14	0	14	0	13	4	13	0	1	10	21	0	0	0	0	16	15	0	20	0	1	6	4	24	1	0	15	6	0	0	10	2	0	0	1	0	24	0	0	0	22	4	1	4
OTU222	d__Bacteria; p__Firmicutes; c__Clostridia; o__Clostridiales; f__Lachnospiraceae	57	1	0	0	23	0	33	3	84	9	27	0	1	20	11	1	24	1	16	0	6	2	0	0	9	0	7	6	0	5	0	1	125	0	9	21	11	0	0	2	33	4	0	1	44	1	29	0
OTU224	d__Bacteria; p__Firmicutes; c__Clostridia; o__Clostridiales; f__Lachnospiraceae	0	18	0	0	0	3	0	0	1	1	0	58	0	0	18	0	0	7	0	0	8	0	0	0	0	0	0	0	0	9	0	0	3	0	0	0	25	2	0	0	0	0	0	0	0	0	0	0
OTU242	d__Bacteria; p__Firmicutes; c__Clostridia; o__Clostridiales; f__Lachnospiraceae	3	0	0	10	0	9	37	0	15	6	36	0	1	5	22	0	2	2	0	4	2	0	1	4	48	0	7	26	0	19	0	5	7	0	7	4	3	0	0	12	2	2	1	0	6	0	13	6
OTU245	d__Bacteria; p__Firmicutes; c__Clostridia; o__Clostridiales; f__Lachnospiraceae	0	0	0	0	0	0	3	1	0	7	42	0	1	1	0	0	0	0	0	0	2	6	0	0	68	2	0	42	0	0	0	1	0	0	5	10	0	0	0	0	0	0	0	0	0	0	1	2
OTU259	d__Bacteria; p__Firmicutes; c__Clostridia; o__Clostridiales; f__Lachnospiraceae	0	0	0	0	5	14	0	0	0	11	0	0	0	0	0	0	0	0	0	0	0	0	0	0	0	7	0	0	0	2	0	0	0	0	0	0	0	0	0	0	7	0	0	0	0	0	6	0
OTU263	d__Bacteria; p__Firmicutes; c__Clostridia; o__Clostridiales; f__Lachnospiraceae	23	54	210	75	263	49	23	16	94	86	157	113	95	79	359	96	63	58	77	11	58	223	38	14	20	11	34	22	219	151	28	17	75	479	242	12	96	425	21	101	229	38	66	490	50	98	62	11
OTU290	d__Bacteria; p__Firmicutes; c__Clostridia; o__Clostridiales; f__Lachnospiraceae	0	5	53	51	7	40	9	12	4	6	1	2	617	4	10	36	3	56	211	4	10	4	9	1	1	9	31	6	1	146	1	6	4	880	10	5	3	90	1	49	5	13	1	418	10	10	8	2
OTU292	d__Bacteria; p__Firmicutes; c__Clostridia; o__Clostridiales; f__Lachnospiraceae	3	4	0	0	6	3	30	1	18	31	66	5	0	10	23	0	16	0	0	39	0	11	0	3	8	4	6	3	0	0	5	21	7	1	6	21	0	0	0	2	14	0	0	0	0	2	11	7
OTU301	d__Bacteria; p__Firmicutes; c__Clostridia; o__Clostridiales; f__Lachnospiraceae	0	0	0	0	0	0	0	0	0	0	378	0	0	0	1	0	21	0	0	0	3	0	0	0	0	0	0	0	0	0	0	0	0	0	3	25	0	0	0	0	0	0	0	0	0	0	0	0
OTU302	d__Bacteria; p__Firmicutes; c__Clostridia; o__Clostridiales; f__Lachnospiraceae	3	19	39	15	125	30	3	2	96	31	36	34	25	22	189	30	31	19	9	5	33	112	9	10	13	1	20	13	87	55	1	1	31	65	134	1	74	125	14	28	116	39	12	160	28	41	29	9
OTU310	d__Bacteria; p__Firmicutes; c__Clostridia; o__Clostridiales; f__Lachnospiraceae	0	0	0	0	0	0	0	0	0	0	0	0	0	0	0	0	0	0	0	0	0	0	0	0	0	2	0	2	0	0	0	0	0	0	400	0	0	0	6	0	0	1	0	281	0	0	0	2
OTU323	d__Bacteria; p__Firmicutes; c__Clostridia; o__Clostridiales; f__Lachnospiraceae	0	0	0	0	2	0	1	3	4	0	7	0	0	10	3	0	8	0	0	4	0	7	0	5	1	0	0	5	0	0	4	15	0	0	2	11	0	0	0	0	2	0	0	0	1	0	1	1
OTU358	d__Bacteria; p__Firmicutes; c__Clostridia; o__Clostridiales; f__Lachnospiraceae	0	0	0	0	7	0	0	0	0	0	145	1	0	0	0	0	0	0	0	0	0	7	0	0	0	0	0	0	0	0	0	0	0	0	1	5	0	0	0	0	9	1	0	0	0	0	0	0
OTU426	d__Bacteria; p__Firmicutes; c__Clostridia; o__Clostridiales; f__Lachnospiraceae	0	3	0	0	11	10	2	2	8	9	24	1	1	3	18	0	5	1	6	8	13	30	0	2	3	5	6	6	0	0	10	4	0	1	2	9	3	0	2	0	10	3	1	1	1	1	13	2
OTU449	d__Bacteria; p__Firmicutes; c__Clostridia; o__Clostridiales; f__Lachnospiraceae	19	0	0	0	1	0	0	0	0	0	85	0	0	0	0	0	6	0	0	0	1	0	0	1	0	0	0	0	0	1	0	0	24	0	1	0	0	0	0	0	4	0	0	13	0	0	0	1
OTU468	d__Bacteria; p__Firmicutes; c__Clostridia; o__Clostridiales; f__Lachnospiraceae	1	0	42	1	0	1	0	4	0	1	0	23	8	0	0	2	0	0	11	0	1	0	0	0	0	0	0	4	45	3	0	0	9	2	0	0	1	94	0	4	0	7	0	33	6	5	1	0
OTU482	d__Bacteria; p__Firmicutes; c__Clostridia; o__Clostridiales; f__Lachnospiraceae	0	0	0	0	0	0	0	0	0	0	0	0	0	0	0	0	0	0	0	0	0	0	0	0	0	0	0	0	0	0	0	0	0	0	0	0	0	0	0	0	0	0	0	0	0	0	0	0
OTU483	d__Bacteria; p__Firmicutes; c__Clostridia; o__Clostridiales; f__Lachnospiraceae	0	0	0	0	0	0	0	0	0	0	0	0	5	0	0	0	0	0	0	0	0	0	0	0	0	0	0	0	0	0	0	0	0	0	0	0	0	0	0	0	0	0	6	0	0	0	0	0
OTU514	d__Bacteria; p__Firmicutes; c__Clostridia; o__Clostridiales; f__Lachnospiraceae	0	0	0	0	0	0	0	0	0	0	0	0	0	0	0	0	0	0	0	0	0	0	0	0	0	0	0	0	0	0	0	0	0	0	0	0	0	0	0	0	0	0	0	0	0	0	0	0
OTU520	d__Bacteria; p__Firmicutes; c__Clostridia; o__Clostridiales; f__Lachnospiraceae	0	0	0	0	0	0	0	0	0	0	0	0	0	0	0	0	0	0	0	0	0	0	0	0	0	0	0	0	0	0	0	0	0	0	0	0	0	0	0	0	0	0	0	0	0	0	0	0
OTU539	d__Bacteria; p__Firmicutes; c__Clostridia; o__Clostridiales; f__Lachnospiraceae	0	1	0	3	199	20	72	12	86	462	391	1	3	12	340	2	26	7	5	325	10	195	13	29	86	120	33	98	0	31	102	13	0	125	33	227	50	0	1	2	306	52	5	349	9	1	20	17
OTU542	d__Bacteria; p__Firmicutes; c__Clostridia; o__Clostridiales; f__Lachnospiraceae	0	2	0	0	2	6	2	6	7	10	1	0	0	0	10	3	5	1	3	3	3	10	7	1	0	0	16	7	56	16	0	1	2	0	0	0	0	0	0	0	5	27	0	0	6	0	3	0
OTU552	d__Bacteria; p__Firmicutes; c__Clostridia; o__Clostridiales; f__Lachnospiraceae	2	0	0	0	2	1	0	1	0	0	10	3	0	1	0	0	3	0	0	1	0	2	0	0	0	1	0	1	0	0	0	5	4	0	0	1	0	0	0	0	3	0	0	0	0	0	0	0
OTU561	d__Bacteria; p__Firmicutes; c__Clostridia; o__Clostridiales; f__Lachnospiraceae	0	0	0	0	0	0	0	0	2	0	0	0	2	1	0	0	0	1	0	0	0	1	2	0	0	0	0	0	0	6	0	0	0	0	10	0	0	0	0	0	0	0	9	0	0	0	1	0
OTU576	d__Bacteria; p__Firmicutes; c__Clostridia; o__Clostridiales; f__Lachnospiraceae	0	0	0	0	0	0	0	0	0	0	0	0	0	0	0	0	0	0	0	0	0	0	0	0	0	0	0	0	0	0	0	0	0	0	0	0	0	0	0	0	0	0	0	0	0	0	0	0
OTU583	d__Bacteria; p__Firmicutes; c__Clostridia; o__Clostridiales; f__Lachnospiraceae	4	0	0	34	5	173	42	23	46	155	40	57	1	78	12	97	12	7	8	15	247	28	7	20	58	20	21	14	11	21	0	32	23	0	150	14	136	0	5	28	9	68	66	244	111	146	0	6
OTU388	d__Bacteria; p__Firmicutes; c__Clostridia; o__Clostridiales; f__Eubacteriaceae; g__Eubacterium	0	0	1	2	0	0	0	0	0	0	0	0	0	0	0	0	0	0	1	0	1	1	0	0	0	0	0	0	1	0	0	0	0	0	0	0	0	1	1	7	0	0	0	0	0	0	0	0
OTU299	d__Bacteria; p__Firmicutes; c__Clostridia; o__Clostridiales; f__Clostridiales_Incertae	0	0	0	1	0	0	0	0	0	1	0	0	1	0	0	0	0	0	0	0	0	0	0	0	0	0	0	0	0	0	0	0	0	0	0	0	0	1	0	4	0	1	0	0	1	0	1	0
OTU389	d__Bacteria; p__Firmicutes; c__Clostridia; o__Clostridiales; f__Clostridiales_Incertae	0	0	0	0	0	0	0	0	0	0	0	13	0	0	0	0	0	0	0	0	0	0	0	0	0	0	0	0	0	0	0	0	0	0	0	0	0	0	0	0	0	0	0	0	0	0	0	0
OTU115	d__Bacteria; p__Firmicutes; c__Clostridia; o__Clostridiales; f__Clostridiaceae	10	9	11	1	7	197	13	4	0	4	2	0	34	14	0	4	3	1	498	0	64	1	3	0	0	9	0	0	60	2	7	2	6	0	246	2	49	10	53	1	5	3	10	1	1	4	180	3
OTU148	d__Bacteria; p__Firmicutes; c__Clostridia; o__Clostridiales; f__Clostridiaceae	0	0	0	0	0	0	0	0	0	0	0	0	35	0	0	0	0	0	0	0	0	0	0	0	0	0	0	0	0	0	0	0	0	237	0	0	1	0	0	0	0	0	0	0	0	0	0	0
OTU196	d__Bacteria; p__Firmicutes; c__Clostridia; o__Clostridiales; f__Clostridiaceae	0	0	6	0	1	42	0	0	0	0	10	0	3	0	0	0	0	0	0	0	12	0	0	0	0	0	0	0	3	4	0	0	0	0	0	0	0	5	0	0	0	1	3	0	0	0	0	0
OTU313	d__Bacteria; p__Firmicutes; c__Clostridia; o__Clostridiales; f__Clostridiaceae	0	0	0	0	0	5	0	0	0	0	0	0	0	4	0	1	0	0	0	0	0	0	0	0	0	0	0	0	0	4	0	0	0	0	0	0	0	1	0	0	0	0	0	2	0	4	0	0
OTU332	d__Bacteria; p__Firmicutes; c__Clostridia; o__Clostridiales; f__Clostridiaceae	0	0	0	0	0	1	0	0	0	0	0	0	1	0	0	0	0	0	0	0	0	0	0	0	1	0	0	0	0	0	0	0	0	0	0	0	0	0	0	0	0	0	0	0	0	0	0	0
OTU440	d__Bacteria; p__Firmicutes; c__Clostridia; o__Clostridiales; f__Clostridiaceae	0	0	0	0	0	0	0	0	0	0	0	0	0	0	0	0	0	0	0	0	0	0	0	0	0	0	0	0	0	0	0	0	0	0	0	0	0	0	0	0	0	0	0	0	0	0	0	0
OTU356	d__Bacteria; p__Firmicutes; c__Clostridia; o__Clostridiales; f__Christensenellaceae; g__Christensenella	0	0	0	1	0	0	5	4	3	3	0	0	0	1	0	0	3	1	0	1	0	0	0	0	0	4	0	3	0	0	16	0	0	0	0	5	0	0	0	1	0	3	1	0	0	0	1	3
OTU544	d__Bacteria; p__Firmicutes; c__Clostridia; o__Clostridiales; f__Catabacteriaceae; g__Catabacter	1	0	0	7	0	0	0	0	1	0	0	0	0	0	0	0	0	0	0	1	1	0	0	0	0	1	0	3	0	0	2	1	0	0	0	0	0	0	0	0	1	0	0	0	0	0	0	0
OTU96	d__Bacteria; p__Firmicutes; c__Clostridia; o__Clostridiales	0	0	0	0	74	0	343	29	0	0	106	0	0	0	0	0	52	0	0	0	188	300	0	0	214	75	0	59	0	0	0	55	0	0	0	1	0	1	0	0	95	0	0	0	0	1	68	24
OTU101	d__Bacteria; p__Firmicutes; c__Clostridia; o__Clostridiales	0	24	0	0	110	0	129	214	1	0	0	0	1	328	0	0	55	0	56	0	35	218	0	0	0	135	0	168	0	1	277	0	0	0	12	91	0	0	0	0	131	0	0	0	0	2	23	0
OTU114	d__Bacteria; p__Firmicutes; c__Clostridia; o__Clostridiales	0	0	0	0	0	1	0	0	151	0	42	0	0	43	103	0	86	220	0	254	0	0	0	0	64	0	0	91	0	0	0	151	0	0	2	8	138	0	0	0	0	106	0	0	0	0	0	2
OTU132	d__Bacteria; p__Firmicutes; c__Clostridia; o__Clostridiales	0	0	0	0	23	0	0	34	0	0	50	0	0	7	0	0	28	0	0	0	2	3	0	0	38	0	0	34	0	0	0	0	0	0	0	5	0	0	0	1	20	0	0	0	0	0	53	214
OTU134	d__Bacteria; p__Firmicutes; c__Clostridia; o__Clostridiales	0	0	0	0	2	0	0	0	66	66	3	0	1	0	0	0	6	0	0	110	4	0	0	0	633	0	0	5	0	0	6	25	0	0	24	324	0	0	0	0	6	0	0	0	0	0	2	70
OTU204	d__Bacteria; p__Firmicutes; c__Clostridia; o__Clostridiales	0	0	0	0	7	0	0	0	100	0	95	0	0	6	0	0	0	0	0	0	0	374	0	0	0	0	0	0	0	0	137	0	0	0	0	0	0	0	0	0	11	0	0	0	0	1	104	5
OTU213	d__Bacteria; p__Firmicutes; c__Clostridia; o__Clostridiales	0	0	0	0	0	0	0	0	6	0	84	0	0	0	0	0	0	0	0	0	1	44	0	0	30	0	0	7	0	1	17	0	0	0	36	336	0	0	0	0	1	0	0	0	0	0	5	0
OTU221	d__Bacteria; p__Firmicutes; c__Clostridia; o__Clostridiales	27	0	0	6	3	0	14	8	0	12	0	0	0	5	18	0	0	0	0	0	6	0	0	0	3	0	0	0	0	8	13	0	31	0	0	0	0	0	1	5	5	14	10	0	0	0	0	11
OTU230	d__Bacteria; p__Firmicutes; c__Clostridia; o__Clostridiales	0	0	0	0	6	0	0	0	0	0	1	0	0	0	5	0	0	0	0	0	0	8	0	0	0	0	0	95	0	0	0	0	0	0	0	0	0	0	0	0	13	0	0	0	0	0	1	8
OTU241	d__Bacteria; p__Firmicutes; c__Clostridia; o__Clostridiales	0	0	0	0	0	0	0	0	0	9	4	0	0	0	0	0	1	0	0	11	1	0	0	0	365	0	0	2	0	0	0	0	0	0	6	31	0	0	0	0	0	0	0	0	0	0	0	1
OTU254	d__Bacteria; p__Firmicutes; c__Clostridia; o__Clostridiales	4	6	0	0	3	0	0	8	5	0	2	6	0	2	7	0	8	5	0	2	0	2	0	2	1	0	0	6	0	4	49	3	7	0	1	5	0	0	0	0	2	2	4	0	5	0	1	3
OTU268	d__Bacteria; p__Firmicutes; c__Clostridia; o__Clostridiales	0	0	0	0	0	0	0	0	0	0	0	0	0	0	0	0	291	0	0	0	0	0	0	0	0	0	0	0	0	0	0	7	0	0	0	0	0	0	0	0	0	0	0	0	0	0	0	0
OTU273	d__Bacteria; p__Firmicutes; c__Clostridia; o__Clostridiales	0	0	0	0	0	0	0	0	0	0	0	0	1	0	0	0	52	0	0	0	0	0	0	0	14	0	0	0	0	0	0	5	0	0	1	51	0	0	0	0	0	0	0	0	0	0	0	20
OTU282	d__Bacteria; p__Firmicutes; c__Clostridia; o__Clostridiales	7	0	0	0	3	0	0	25	12	11	8	0	1	14	4	0	26	0	0	21	0	6	0	15	5	0	0	10	0	0	29	19	11	0	3	18	1	0	0	0	2	0	5	0	0	0	1	4
OTU283	d__Bacteria; p__Firmicutes; c__Clostridia; o__Clostridiales	0	0	0	0	0	0	0	0	0	0	0	0	0	0	0	0	0	0	0	0	0	0	0	0	399	0	0	0	0	0	0	0	0	0	0	0	0	0	0	0	0	0	0	0	0	0	0	0
OTU291	d__Bacteria; p__Firmicutes; c__Clostridia; o__Clostridiales	0	0	0	0	0	0	0	0	0	0	0	0	0	0	0	0	0	0	0	0	0	0	0	0	0	0	0	0	0	0	0	18	0	0	10	90	0	0	0	0	0	0	0	0	0	0	2	0
OTU321	d__Bacteria; p__Firmicutes; c__Clostridia; o__Clostridiales	0	0	0	0	0	0	0	0	0	0	0	0	0	0	0	0	0	0	0	0	0	98	0	0	0	0	0	0	0	0	0	0	0	0	0	0	0	0	0	0	0	0	0	0	0	0	0	0
OTU335	d__Bacteria; p__Firmicutes; c__Clostridia; o__Clostridiales	0	0	0	0	0	0	0	0	0	1	226	0	0	0	0	0	0	0	0	0	0	0	0	0	0	0	0	0	0	0	0	0	0	0	0	0	0	0	0	0	0	0	0	0	0	0	0	0
OTU341	d__Bacteria; p__Firmicutes; c__Clostridia; o__Clostridiales	5	4	0	0	0	0	8	7	5	2	0	13	0	2	2	0	2	0	0	0	1	1	0	5	0	8	0	20	0	0	4	21	7	0	0	0	0	0	0	0	1	4	1	0	1	0	0	2
OTU342	d__Bacteria; p__Firmicutes; c__Clostridia; o__Clostridiales	0	0	0	0	0	0	0	0	6	0	17	0	0	0	0	0	17	0	0	0	0	0	0	0	0	0	0	28	0	0	0	5	0	0	1	27	0	0	0	0	0	0	0	0	0	0	8	0
OTU360	d__Bacteria; p__Firmicutes; c__Clostridia; o__Clostridiales	2	6	0	1	5	12	6	9	19	17	3	1	0	12	10	24	8	1	0	15	98	9	2	4	9	1	7	4	24	0	2	4	9	0	21	0	14	0	4	2	9	28	18	0	3	25	7	1
OTU361	d__Bacteria; p__Firmicutes; c__Clostridia; o__Clostridiales	0	0	0	0	0	0	0	10	0	0	17	0	0	10	0	0	23	0	0	15	0	0	0	0	23	0	0	23	0	0	18	17	0	0	2	9	0	0	0	0	4	0	0	0	0	0	0	4
OTU379	d__Bacteria; p__Firmicutes; c__Clostridia; o__Clostridiales	0	0	0	0	5	0	0	5	7	0	0	0	0	0	0	0	0	0	0	2	0	0	0	0	27	0	0	23	0	0	0	0	0	0	0	0	0	0	0	0	7	0	0	0	0	0	2	2
OTU395	d__Bacteria; p__Firmicutes; c__Clostridia; o__Clostridiales	0	0	0	0	0	0	0	2	9	0	2	0	0	1	0	0	15	0	0	10	0	0	0	0	0	0	0	9	0	0	37	5	0	0	0	3	0	0	0	0	0	0	0	0	0	0	0	0
OTU411	d__Bacteria; p__Firmicutes; c__Clostridia; o__Clostridiales	0	0	0	0	0	0	0	0	0	0	0	0	0	0	0	0	0	0	0	0	0	0	0	0	3	0	0	0	0	0	0	0	0	0	9	74	0	0	0	0	0	0	0	0	0	0	0	0
OTU432	d__Bacteria; p__Firmicutes; c__Clostridia; o__Clostridiales	0	0	0	0	0	0	0	0	0	0	0	0	0	11	0	0	0	0	0	0	0	0	0	0	0	0	0	0	0	0	0	0	0	0	2	10	0	0	0	0	0	0	0	0	0	0	0	0
OTU435	d__Bacteria; p__Firmicutes; c__Clostridia; o__Clostridiales	0	1	0	0	0	0	0	0	0	0	0	4	1	0	0	0	0	0	0	0	0	0	0	1	0	0	0	3	0	0	1	0	0	0	0	0	0	0	0	0	0	0	0	0	0	0	0	0
OTU446	d__Bacteria; p__Firmicutes; c__Clostridia; o__Clostridiales	0	0	0	0	0	0	0	0	0	0	36	0	1	0	0	0	0	0	0	0	0	0	0	0	24	0	0	0	0	0	0	0	0	0	0	0	0	0	0	0	0	0	0	0	0	0	0	0
OTU497	d__Bacteria; p__Firmicutes; c__Clostridia; o__Clostridiales	0	0	0	0	0	0	0	0	0	0	4	0	0	17	0	0	0	0	0	0	0	0	0	0	0	0	0	0	0	0	0	8	0	0	0	1	0	0	0	0	0	0	0	0	0	0	0	1
OTU507	d__Bacteria; p__Firmicutes; c__Clostridia; o__Clostridiales	1	0	0	0	1	0	6	0	2	0	0	0	0	0	0	0	0	3	0	3	1	0	0	3	0	0	0	2	0	0	0	2	2	0	0	0	0	0	0	0	0	2	0	0	0	0	0	0
OTU515	d__Bacteria; p__Firmicutes; c__Clostridia; o__Clostridiales	0	0	0	0	0	0	0	0	62	0	0	0	0	0	0	0	0	0	0	0	0	0	0	0	0	0	0	0	0	0	0	1	0	0	0	0	0	0	0	0	0	0	0	0	0	0	0	0
OTU523	d__Bacteria; p__Firmicutes; c__Clostridia; o__Clostridiales	3	0	0	0	0	0	0	0	0	0	0	0	0	0	0	0	0	0	0	0	0	0	0	0	0	0	4	0	0	0	1	0	3	0	0	0	0	0	0	0	0	0	0	0	0	0	2	0
OTU536	d__Bacteria; p__Firmicutes; c__Clostridia; o__Clostridiales	4	2	0	0	2	0	5	1	4	3	2	0	0	7	1	0	1	2	0	0	2	5	0	0	0	1	0	9	0	0	5	2	12	0	0	0	0	0	0	0	2	0	16	0	0	0	0	2
OTU541	d__Bacteria; p__Firmicutes; c__Clostridia; o__Clostridiales	0	0	0	0	0	0	0	0	0	0	0	0	0	0	0	0	8	0	0	0	0	0	0	0	2	0	0	0	0	0	0	0	0	0	0	2	0	0	0	0	0	0	0	0	0	0	0	3
OTU562	d__Bacteria; p__Firmicutes; c__Clostridia; o__Clostridiales	0	0	0	0	1	0	0	0	0	0	0	0	0	0	0	0	5	0	0	0	0	0	0	0	7	0	0	0	0	0	0	3	0	0	0	0	0	0	0	0	0	0	0	0	0	0	0	1
OTU565	d__Bacteria; p__Firmicutes; c__Clostridia; o__Clostridiales	1	1	0	1	8	7	3	1	2	3	2	0	1	1	10	3	3	2	0	7	5	7	0	0	0	0	0	4	0	0	4	0	5	0	1	0	2	0	0	2	3	4	0	0	0	9	16	1
OTU567	d__Bacteria; p__Firmicutes; c__Clostridia; o__Clostridiales	0	0	0	0	0	0	0	0	0	0	0	0	0	0	0	0	0	0	0	0	0	0	0	0	0	0	0	0	0	0	0	0	0	0	18	91	0	0	0	0	0	0	0	0	0	0	0	0
OTU577	d__Bacteria; p__Firmicutes; c__Clostridia; o__Clostridiales	0	0	0	0	0	0	0	0	0	0	0	3	0	0	0	0	0	0	0	1	0	0	0	0	0	0	0	0	0	0	1	0	0	0	0	0	0	0	0	0	0	0	0	0	0	0	0	0
OTU581	d__Bacteria; p__Firmicutes; c__Clostridia; o__Clostridiales	0	0	0	0	0	0	0	1	0	3	0	0	0	1	0	0	2	0	0	6	1	0	0	0	0	1	0	1	0	0	23	0	0	0	0	0	0	0	0	0	0	5	0	0	0	0	0	0
OTU592	d__Bacteria; p__Firmicutes; c__Clostridia; o__Clostridiales	0	0	0	0	75	0	0	0	0	0	249	0	3	39	0	0	121	1	0	0	0	3	0	0	114	0	0	63	0	0	0	4	0	0	24	275	6	0	0	0	73	0	0	0	0	1	111	360
OTU595	d__Bacteria; p__Firmicutes; c__Clostridia; o__Clostridiales	0	0	0	0	11	1	0	3	8	4	1	0	0	1	10	0	7	0	0	5	4	5	3	1	3	1	2	4	0	15	0	1	1	0	4	0	23	0	0	0	6	13	0	0	4	0	14	2
OTU598	d__Bacteria; p__Firmicutes; c__Clostridia; o__Clostridiales	0	0	0	0	0	0	0	0	0	0	0	0	0	0	0	0	20	0	0	0	0	0	0	0	0	0	0	0	0	0	0	0	0	0	0	0	0	0	0	0	0	0	0	0	0	0	0	0
OTU175	d__Bacteria; p__Firmicutes; c__Clostridia	0	4	0	3	93	0	7	6	26	0	69	0	0	30	0	0	78	0	0	40	0	93	0	46	90	0	0	16	0	0	200	59	0	0	7	47	0	0	1	7	91	0	0	0	0	0	0	10
OTU41	d__Bacteria; p__Firmicutes; c__Bacilli; o__Lactobacillales; f__Streptococcaceae; g__Streptococcus	12	20	8	6	161	9	47	0	9	54	430	9	1	34	30	11	1	6	31	3	123	361	37	4	13	28	9	7	482	140	16	22	33	13	32	1	51	24	32	7	161	20	3	4	2	173	17	3
OTU149	d__Bacteria; p__Firmicutes; c__Bacilli; o__Lactobacillales; f__Streptococcaceae; g__Streptococcus	0	0	910	1	2	0	0	0	0	1	3	0	0	0	3	1	0	0	0	0	4	2	1	0	0	1	0	2	6	4	1	0	3	0	3	0	377	1428	2	2	1	0	3	0	0	9	1	0
OTU187	d__Bacteria; p__Firmicutes; c__Bacilli; o__Lactobacillales; f__Streptococcaceae; g__Streptococcus	6	13	5	5	48	7	30	1	1	43	70	6	32	3	38	18	1	5	41	1	43	17	9	0	4	12	4	9	87	25	7	9	22	11	15	3	14	7	6	13	46	21	14	7	5	56	8	0
OTU296	d__Bacteria; p__Firmicutes; c__Bacilli; o__Lactobacillales; f__Streptococcaceae; g__Streptococcus	0	0	0	0	0	0	0	0	0	0	0	0	0	0	0	0	0	0	0	0	0	0	0	0	0	0	0	0	0	0	0	0	0	0	0	0	0	0	0	0	0	0	0	0	0	0	0	0
OTU447	d__Bacteria; p__Firmicutes; c__Bacilli; o__Lactobacillales; f__Streptococcaceae; g__Streptococcus	0	0	1	1	0	0	2	0	2	10	3	0	1	0	8	2	0	0	1	1	3	0	0	0	0	0	0	0	13	0	0	0	1	0	0	1	0	1	0	2	0	1	2	0	0	1	0	0
OTU467	d__Bacteria; p__Firmicutes; c__Bacilli; o__Lactobacillales; f__Streptococcaceae; g__Streptococcus	0	0	1	0	1	0	0	0	0	1	12	0	0	0	0	0	0	0	0	1	1	0	0	0	2	0	0	0	0	1	0	0	0	0	0	0	0	1	0	1	0	0	2	0	0	1	0	0
OTU253	d__Bacteria; p__Firmicutes; c__Bacilli; o__Lactobacillales; f__Streptococcaceae; g__Lactococcus	0	0	0	0	0	0	0	0	0	0	0	0	1	0	0	0	0	0	0	0	0	0	0	0	0	0	0	0	0	0	0	0	0	0	0	0	0	0	0	0	0	0	4	0	0	0	0	0
OTU344	d__Bacteria; p__Firmicutes; c__Bacilli; o__Lactobacillales; f__Streptococcaceae; g__Lactococcus	0	1	0	0	0	0	0	0	0	0	0	0	0	0	0	0	0	0	0	0	0	0	1	0	0	0	0	0	0	0	0	0	0	1	0	9	0	0	1	0	0	5	0	0	1	0	0	0
OTU423	d__Bacteria; p__Firmicutes; c__Bacilli; o__Lactobacillales; f__Leuconostocaceae; g__Weissella	0	0	0	0	0	0	0	0	0	0	0	0	0	0	0	0	0	0	0	0	0	0	0	0	0	0	0	0	0	3	0	0	0	0	1	7	0	0	0	0	0	0	0	0	0	0	0	2
OTU392	d__Bacteria; p__Firmicutes; c__Bacilli; o__Lactobacillales; f__Leuconostocaceae; g__Leuconostoc	0	0	0	0	0	0	0	0	0	0	0	0	0	0	0	0	0	0	0	0	0	0	0	0	0	0	0	0	0	0	0	0	0	1	0	1	0	0	0	0	0	0	0	0	0	3	0	0
OTU140	d__Bacteria; p__Firmicutes; c__Bacilli; o__Lactobacillales; f__Lactobacillaceae; g__Lactobacillus	0	1	5	0	0	0	0	0	2	0	0	0	0	0	0	0	2	0	0	0	0	0	0	0	0	0	0	0	0	10	0	0	0	0	0	0	0	4	0	0	0	2	17	0	0	0	0	0
OTU177	d__Bacteria; p__Firmicutes; c__Bacilli; o__Lactobacillales; f__Lactobacillaceae; g__Lactobacillus	0	0	2	0	7	0	0	0	1	0	4	0	2	0	0	0	0	0	0	0	0	2	1	0	0	0	0	0	0	1	0	0	0	0	0	0	0	2	0	0	8	0	3	0	0	0	0	0
OTU193	d__Bacteria; p__Firmicutes; c__Bacilli; o__Lactobacillales; f__Lactobacillaceae; g__Lactobacillus	0	0	52	0	0	0	0	0	0	0	0	0	1	0	0	0	0	0	0	0	0	0	0	0	0	0	0	0	0	47	0	0	0	0	0	0	0	89	0	0	0	0	9	0	0	0	0	0
OTU239	d__Bacteria; p__Firmicutes; c__Bacilli; o__Lactobacillales; f__Lactobacillaceae; g__Lactobacillus	0	0	0	0	0	0	0	0	0	0	0	0	6	0	0	0	0	0	0	0	0	0	0	0	0	0	0	0	0	0	0	0	0	0	0	0	0	0	2	0	0	0	0	0	0	0	0	239
OTU262	d__Bacteria; p__Firmicutes; c__Bacilli; o__Lactobacillales; f__Lactobacillaceae; g__Lactobacillus	0	0	0	0	0	0	0	0	0	0	0	0	2	0	0	0	0	0	0	0	0	0	1	0	0	0	0	0	0	0	0	0	0	0	0	0	0	0	0	0	0	0	0	0	0	0	0	0
OTU469	d__Bacteria; p__Firmicutes; c__Bacilli; o__Lactobacillales; f__Lactobacillaceae; g__Lactobacillus	0	0	3	0	0	0	0	0	1	0	0	0	4	0	0	0	0	0	0	0	0	0	0	0	0	0	0	0	0	1	0	0	0	0	0	1	0	4	0	0	0	0	0	0	0	0	0	0
OTU530	d__Bacteria; p__Firmicutes; c__Bacilli; o__Lactobacillales; f__Lactobacillaceae; g__Lactobacillus	0	0	0	0	0	0	0	0	0	0	0	1	8	0	0	0	0	0	1	0	0	0	0	0	0	6	0	1	0	0	0	0	0	0	0	0	0	0	0	0	0	0	0	0	0	0	0	0
OTU560	d__Bacteria; p__Firmicutes; c__Bacilli; o__Lactobacillales; f__Lactobacillaceae; g__Lactobacillus	0	0	0	0	0	0	0	0	0	0	0	0	0	0	0	0	0	0	0	0	0	0	0	0	0	0	0	0	0	0	0	0	0	0	0	0	0	0	0	0	0	0	0	0	0	52	0	0
OTU585	d__Bacteria; p__Firmicutes; c__Bacilli; o__Lactobacillales; f__Lactobacillaceae; g__Lactobacillus	0	0	6	0	0	0	0	0	0	0	1	0	2	0	0	0	0	0	0	0	0	0	0	0	0	0	0	0	0	16	0	0	0	0	0	0	0	13	0	0	0	0	0	0	0	0	0	0
OTU325	d__Bacteria; p__Firmicutes; c__Bacilli; o__Lactobacillales; f__Enterococcaceae; g__Enterococcus	0	0	2	0	0	0	2	0	0	0	1	3	21	0	0	0	0	0	0	0	0	0	0	0	0	0	0	0	1	0	0	0	0	0	0	0	0	1	1	0	0	0	0	9	0	0	0	0
OTU235	d__Bacteria; p__Firmicutes; c__Bacilli; o__Lactobacillales; f__Carnobacteriaceae; g__Granulicatella	1	3	2	1	1	0	2	0	0	2	0	1	6	0	3	5	0	0	5	0	3	4	0	0	0	0	1	0	7	1	1	0	0	7	4	1	0	0	1	4	0	3	0	2	1	2	0	0
OTU295	d__Bacteria; p__Firmicutes; c__Bacilli; o__Bacillales; f__Staphylococcaceae; g__Staphylococcus	0	0	3	0	0	0	3	0	0	0	0	0	91	0	0	2	0	4	1	1	0	0	1	0	0	2	0	0	0	0	0	0	0	2	0	2	0	0	0	0	0	0	0	1	1	0	0	0
OTU547	d__Bacteria; p__Firmicutes; c__Bacilli; o__Bacillales; f__Bacillales_Incertae	0	1	0	3	2	1	0	0	0	0	1	0	3	0	0	3	0	1	7	0	2	0	1	0	0	1	1	0	3	3	0	0	0	1	1	1	0	3	0	1	2	0	0	1	1	0	0	0
OTU63	d__Bacteria; p__Firmicutes	74	9	0	5	675	1	425	7	644	0	16	0	4	5	395	0	1019	0	0	0	0	1083	0	0	21	0	0	27	0	0	0	41	101	0	19	136	0	1	0	4	816	0	0	0	0	0	175	129
OTU243	d__Bacteria; p__Firmicutes	0	0	0	0	0	0	0	0	240	87	0	0	0	0	2	0	0	0	0	11	0	27	0	0	3	0	0	0	0	0	324	0	0	0	0	1	0	0	0	0	0	0	0	0	0	0	0	0
OTU277	d__Bacteria; p__Firmicutes	0	0	0	0	0	0	0	6	0	7	0	0	0	0	0	0	14	0	0	34	0	0	0	0	6	0	0	0	0	0	0	13	0	0	2	22	0	0	0	0	0	0	0	0	0	0	1	6
OTU315	d__Bacteria; p__Firmicutes	0	0	0	0	2	0	0	0	44	0	2	0	0	0	0	0	0	0	0	22	1	0	0	0	1	0	0	39	0	0	1	81	0	0	3	29	0	0	0	0	4	0	0	0	0	0	0	0
OTU359	d__Bacteria; p__Firmicutes	0	0	0	0	1	0	17	26	10	16	2	0	0	3	5	0	12	0	0	26	0	0	0	0	12	1	0	8	0	0	1	2	0	0	0	0	0	0	0	0	1	0	0	0	0	0	1	2
OTU413	d__Bacteria; p__Firmicutes	0	0	0	0	0	0	0	0	0	0	6	0	0	0	0	0	0	0	0	0	0	0	0	0	0	0	0	0	0	0	0	0	0	0	0	0	0	0	0	0	0	0	0	0	0	0	0	0
OTU439	d__Bacteria; p__Firmicutes	0	0	0	0	0	0	0	0	0	0	0	0	0	0	0	0	0	0	0	0	0	0	0	0	0	0	0	0	0	0	0	0	0	0	0	0	0	0	0	0	0	0	0	0	0	0	0	0
OTU441	d__Bacteria; p__Firmicutes	0	0	0	0	0	0	0	0	0	0	16	0	0	0	0	0	0	0	0	0	0	0	0	0	0	0	0	0	0	0	0	0	0	0	0	0	0	0	0	0	0	0	0	0	0	0	0	0
OTU502	d__Bacteria; p__Firmicutes	0	0	0	0	0	0	0	8	0	0	1	0	0	0	0	0	0	0	0	0	0	0	0	0	7	0	0	0	0	0	0	0	0	0	2	6	0	0	0	0	0	0	0	0	0	0	0	1
OTU526	d__Bacteria; p__Firmicutes	0	0	0	0	0	0	0	0	0	0	0	0	0	0	0	0	1	0	0	0	1	0	0	0	23	6	0	0	0	0	0	1	0	0	0	1	0	0	0	0	0	0	0	0	0	0	0	1
OTU590	d__Bacteria; p__Cyanobacteria/Chloroplast; c__Chloroplast; o__Chloroplast; f__Chloroplast; g__Streptophyta	0	0	0	0	1	1	1	0	0	1	11	0	1	0	1	0	0	0	0	0	0	0	0	0	0	0	0	0	0	0	0	0	0	0	0	0	0	0	0	0	0	0	2	2	0	0	1	0
OTU331	d__Bacteria; p__Candidatus	0	3	3	6	1	3	0	0	1	1	2	1	5	0	2	1	0	1	10	0	0	0	3	0	0	0	2	1	3	0	0	0	0	0	3	1	1	11	0	5	0	1	0	1	1	1	0	0
OTU575	d__Bacteria; p__Candidatus	0	0	3	0	0	0	0	0	1	0	0	1	2	0	0	1	0	0	1	1	0	1	3	0	0	0	0	0	0	0	0	0	0	0	0	0	0	0	0	2	0	2	1	0	1	0	0	1
OTU491	d__Bacteria; p__Bacteroidetes; c__Flavobacteriia; o__Flavobacteriales	0	0	0	0	0	0	0	0	0	0	1	0	0	0	0	0	21	0	0	0	0	0	0	0	0	0	0	0	0	0	0	0	0	1	0	0	0	0	0	0	1	0	0	0	0	0	0	0
OTU22	d__Bacteria; p__Bacteroidetes; c__Bacteroidia; o__Bacteroidales; f__Rikenellaceae; g__Alistipes	228	141	0	526	178	0	231	0	457	0	7	1082	34	324	551	1	823	0	1	156	32	244	561	446	88	242	7	1227	0	436	917	267	453	0	14	5	0	0	1	352	166	0	697	0	216	0	100	86
OTU43	d__Bacteria; p__Bacteroidetes; c__Bacteroidia; o__Bacteroidales; f__Rikenellaceae; g__Alistipes	6	50	0	0	5	1	5	0	65	168	13	64	5	8	10	0	80	76	5	55	4	39	0	18	44	181	0	127	0	73	183	0	11	0	2	0	0	0	0	1	6	151	1	0	40	0	14	6
OTU103	d__Bacteria; p__Bacteroidetes; c__Bacteroidia; o__Bacteroidales; f__Rikenellaceae; g__Alistipes	42	47	0	125	64	60	139	68	283	26	20	78	2	47	62	0	485	32	39	66	4	42	0	113	40	112	23	94	8	71	39	108	72	0	1	12	0	0	0	85	66	235	38	0	20	1	18	44
OTU136	d__Bacteria; p__Bacteroidetes; c__Bacteroidia; o__Bacteroidales; f__Rikenellaceae; g__Alistipes	40	0	0	0	4	0	40	43	40	28	0	0	0	17	0	0	35	1	0	60	4	0	0	13	0	0	0	34	55	67	169	22	35	0	1	12	0	0	1	0	5	111	3	0	0	0	8	37
OTU147	d__Bacteria; p__Bacteroidetes; c__Bacteroidia; o__Bacteroidales; f__Rikenellaceae; g__Alistipes	2	0	0	0	0	0	0	0	0	166	10	0	0	1	0	0	5	0	0	0	0	0	0	0	29	0	0	0	0	0	0	0	0	0	0	0	0	0	0	0	1	783	0	0	0	0	0	0
OTU182	d__Bacteria; p__Bacteroidetes; c__Bacteroidia; o__Bacteroidales; f__Rikenellaceae; g__Alistipes	2	11	0	0	2	0	0	5	8	13	99	5	1	3	0	0	17	9	0	13	0	10	0	2	4	26	1	22	0	7	40	1	1	0	1	0	0	0	0	0	0	0	7	0	10	0	3	1
OTU197	d__Bacteria; p__Bacteroidetes; c__Bacteroidia; o__Bacteroidales; f__Rikenellaceae; g__Alistipes	0	0	0	13	2	0	0	98	2	0	0	9	0	3	1	0	17	0	0	15	0	2	0	0	2	54	0	0	0	2	77	24	1	0	0	0	0	0	0	7	2	8	0	0	0	0	0	0
OTU199	d__Bacteria; p__Bacteroidetes; c__Bacteroidia; o__Bacteroidales; f__Rikenellaceae; g__Alistipes	0	0	0	0	0	0	40	0	0	0	1	0	0	12	0	0	11	0	0	0	0	0	0	9	0	47	1	52	1	0	114	7	0	0	1	0	0	0	0	0	0	69	0	0	0	0	0	2
OTU220	d__Bacteria; p__Bacteroidetes; c__Bacteroidia; o__Bacteroidales; f__Rikenellaceae; g__Alistipes	10	0	0	0	6	0	2	0	0	8	0	0	0	0	8	0	25	0	0	6	0	14	0	9	0	22	0	10	0	0	9	14	10	0	0	0	0	0	0	0	6	0	11	0	8	0	5	12
OTU249	d__Bacteria; p__Bacteroidetes; c__Bacteroidia; o__Bacteroidales; f__Rikenellaceae; g__Alistipes	15	0	0	5	7	6	1	0	2	0	1	0	0	8	0	0	12	0	0	2	0	1	0	0	0	0	2	13	0	0	6	1	39	0	0	0	0	0	0	20	10	0	0	0	0	0	4	0
OTU327	d__Bacteria; p__Bacteroidetes; c__Bacteroidia; o__Bacteroidales; f__Rikenellaceae; g__Alistipes	0	0	0	0	0	0	0	0	0	1	3	0	0	0	0	0	0	0	0	0	0	0	0	52	0	0	0	168	0	0	0	0	0	0	0	0	0	0	0	0	0	0	0	0	0	0	0	0
OTU462	d__Bacteria; p__Bacteroidetes; c__Bacteroidia; o__Bacteroidales; f__Rikenellaceae; g__Alistipes	0	2	0	6	1	4	0	0	6	1	1	0	0	0	0	0	0	3	0	0	0	0	20	1	4	1	0	0	0	0	0	0	0	0	0	0	0	0	0	3	1	0	1	0	0	0	0	4
OTU487	d__Bacteria; p__Bacteroidetes; c__Bacteroidia; o__Bacteroidales; f__Rikenellaceae; g__Alistipes	3	1	0	8	2	5	3	1	4	0	0	14	0	9	4	0	19	0	2	3	0	7	50	10	0	6	1	21	0	11	61	32	4	0	3	16	0	0	0	4	8	18	9	0	0	0	3	2
OTU543	d__Bacteria; p__Bacteroidetes; c__Bacteroidia; o__Bacteroidales; f__Rikenellaceae; g__Alistipes	3	9	0	2	2	0	5	1	13	0	0	62	2	6	22	0	20	0	0	3	0	4	40	9	2	1	1	47	0	27	20	0	5	0	0	0	0	0	0	4	1	5	11	0	13	0	7	7
OTU5	d__Bacteria; p__Bacteroidetes; c__Bacteroidia; o__Bacteroidales; f__Prevotellaceae; g__Prevotella	1	8984	0	5077	1	2	0	635	0	6	4753	1	29	7346	3	5	0	0	3	5	5927	7	0	4967	7997	7744	4	1081	0	3	31	12157	1	3	55	561	2	7	13180	6396	2	4	3	3	1	4362	9	0
OTU77	d__Bacteria; p__Bacteroidetes; c__Bacteroidia; o__Bacteroidales; f__Prevotellaceae; g__Prevotella	1968	0	0	0	0	0	0	0	0	0	0	1	0	0	0	0	2297	0	0	0	0	0	0	0	0	0	0	0	0	1	0	223	4178	0	1	0	0	0	1	0	0	0	0	0	0	0	0	0
OTU83	d__Bacteria; p__Bacteroidetes; c__Bacteroidia; o__Bacteroidales; f__Prevotellaceae; g__Prevotella	0	0	0	0	0	0	0	0	0	0	0	0	0	0	0	0	0	0	0	0	0	0	0	0	1	0	0	0	0	0	0	0	1	0	0	0	0	0	0	0	0	1	0	0	0	1	0	0
OTU94	d__Bacteria; p__Bacteroidetes; c__Bacteroidia; o__Bacteroidales; f__Prevotellaceae; g__Prevotella	0	0	0	0	0	0	0	6	0	0	1	0	3	2133	0	0	0	0	0	4	5392	0	0	0	0	0	0	206	0	0	0	0	0	1	2	16	0	3	1466	0	0	0	0	0	0	0	0	0
OTU128	d__Bacteria; p__Bacteroidetes; c__Bacteroidia; o__Bacteroidales; f__Prevotellaceae; g__Prevotella	1	1477	0	2192	0	0	4	4116	1	10	8470	0	8	1135	0	0	0	1	2	7	5981	6	0	6493	5177	2843	1	1511	1	1	59	7098	0	0	135	1485	2	2	4195	2739	2	1	0	4	2	5449	10	2
OTU139	d__Bacteria; p__Bacteroidetes; c__Bacteroidia; o__Bacteroidales; f__Prevotellaceae; g__Prevotella	0	0	0	0	0	0	1	576	0	0	0	0	2	0	0	0	0	0	0	0	3	1	0	886	15	0	0	19	0	0	0	64	0	0	82	969	0	0	485	0	0	0	0	0	0	187	7	0
OTU192	d__Bacteria; p__Bacteroidetes; c__Bacteroidia; o__Bacteroidales; f__Prevotellaceae; g__Prevotella	0	0	0	0	0	0	0	0	0	0	0	0	1	0	0	0	0	0	0	0	0	0	0	0	0	0	0	0	0	0	0	0	0	0	10	88	0	0	0	0	0	0	0	0	0	0	1	0
OTU198	d__Bacteria; p__Bacteroidetes; c__Bacteroidia; o__Bacteroidales; f__Prevotellaceae; g__Prevotella	0	0	0	0	0	0	0	0	0	0	0	0	0	189	1	0	0	0	0	0	382	1	0	0	0	1	0	25	0	0	0	0	0	0	117	1057	0	0	161	0	0	0	0	0	0	58	7	0
OTU226	d__Bacteria; p__Bacteroidetes; c__Bacteroidia; o__Bacteroidales; f__Prevotellaceae; g__Prevotella	0	0	0	0	0	0	0	0	0	0	0	0	0	0	0	0	0	0	0	0	0	0	0	0	0	0	0	0	0	0	0	0	0	0	2	40	0	0	0	0	0	0	0	0	0	0	2	0
OTU298	d__Bacteria; p__Bacteroidetes; c__Bacteroidia; o__Bacteroidales; f__Prevotellaceae; g__Prevotella	0	0	0	0	0	0	0	0	0	0	0	0	0	2	0	0	0	0	1	0	75	0	0	0	0	0	0	1	0	0	0	0	0	0	9	68	0	0	4	0	0	0	0	0	0	1419	2	0
OTU367	d__Bacteria; p__Bacteroidetes; c__Bacteroidia; o__Bacteroidales; f__Prevotellaceae; g__Prevotella	0	0	0	0	0	0	0	0	0	0	0	0	0	0	0	0	0	0	0	0	0	0	0	0	0	0	0	0	0	0	0	0	0	0	20	139	0	0	0	0	0	0	0	0	0	31	0	0
OTU391	d__Bacteria; p__Bacteroidetes; c__Bacteroidia; o__Bacteroidales; f__Prevotellaceae; g__Prevotella	0	369	0	39	0	0	0	335	0	0	25	0	5	114	0	0	0	0	0	0	126	0	0	385	89	24	0	150	0	0	4	61	0	1	1	0	0	0	5	74	0	0	0	0	1	1	0	0
OTU418	d__Bacteria; p__Bacteroidetes; c__Bacteroidia; o__Bacteroidales; f__Prevotellaceae; g__Prevotella	0	0	0	0	0	0	0	1	0	0	0	0	13	0	0	0	0	0	0	0	0	0	0	0	0	12	0	0	0	0	0	0	0	1	0	1	0	0	0	0	0	0	0	0	0	0	0	0
OTU422	d__Bacteria; p__Bacteroidetes; c__Bacteroidia; o__Bacteroidales; f__Prevotellaceae; g__Prevotella	0	0	0	0	0	0	0	1	0	0	0	0	0	395	0	0	0	0	0	1	1350	0	0	0	0	0	0	32	0	0	0	0	0	0	0	0	0	0	640	1	0	0	0	0	0	40	0	0
OTU455	d__Bacteria; p__Bacteroidetes; c__Bacteroidia; o__Bacteroidales; f__Prevotellaceae; g__Prevotella	0	6	0	23	1	1	0	2174	1	0	3	0	3	0	0	0	0	0	0	1	58	0	0	2030	433	12	0	57	0	0	1	241	0	0	39	438	0	0	248	22	0	0	0	0	0	653	2	0
OTU477	d__Bacteria; p__Bacteroidetes; c__Bacteroidia; o__Bacteroidales; f__Prevotellaceae; g__Prevotella	0	0	0	0	0	0	0	0	0	0	0	0	0	0	0	0	0	0	0	0	0	0	0	0	0	0	0	0	0	0	0	0	0	0	0	0	0	0	0	0	0	0	0	0	0	0	0	0
OTU553	d__Bacteria; p__Bacteroidetes; c__Bacteroidia; o__Bacteroidales; f__Prevotellaceae; g__Prevotella	0	0	0	1	0	0	0	0	0	0	0	0	0	0	0	0	0	0	0	0	0	0	0	0	0	0	0	0	0	0	2	0	0	0	0	0	0	0	0	3	0	0	0	0	0	0	0	0
OTU97	d__Bacteria; p__Bacteroidetes; c__Bacteroidia; o__Bacteroidales; f__Prevotellaceae; g__Paraprevotella	0	0	0	0	0	0	0	0	0	0	101	0	0	0	0	0	0	0	0	0	0	0	0	0	0	0	0	0	0	0	0	0	0	0	0	0	0	0	0	0	0	0	0	0	0	0	0	0
OTU107	d__Bacteria; p__Bacteroidetes; c__Bacteroidia; o__Bacteroidales; f__Prevotellaceae; g__Paraprevotella	98	0	0	3	0	513	0	0	115	0	0	0	1	23	0	0	2	0	0	0	0	0	0	3	1	713	0	65	1	0	3	9	133	0	10	72	0	0	0	7	0	0	0	0	0	0	0	0
OTU170	d__Bacteria; p__Bacteroidetes; c__Bacteroidia; o__Bacteroidales; f__Prevotellaceae; g__Paraprevotella	79	0	0	52	0	159	0	0	52	0	0	0	2	11	0	0	44	0	0	0	0	0	0	52	0	265	0	53	0	0	28	173	89	0	44	21	0	0	0	57	0	0	0	0	0	0	1	0
OTU316	d__Bacteria; p__Bacteroidetes; c__Bacteroidia; o__Bacteroidales; f__Prevotellaceae; g__Paraprevotella	0	0	0	0	88	0	0	0	0	0	0	0	0	0	0	0	0	0	0	0	0	0	0	0	0	0	0	25	0	0	0	0	0	0	0	0	0	0	0	0	95	0	0	0	0	0	0	0
OTU407	d__Bacteria; p__Bacteroidetes; c__Bacteroidia; o__Bacteroidales; f__Prevotellaceae; g__Paraprevotella	0	0	0	0	4	0	0	0	0	0	0	0	0	0	0	0	0	0	0	0	0	0	0	0	0	0	0	29	0	0	0	0	0	0	0	0	0	0	0	0	3	0	0	0	0	0	0	0
OTU517	d__Bacteria; p__Bacteroidetes; c__Bacteroidia; o__Bacteroidales; f__Prevotellaceae; g__Paraprevotella	0	0	0	0	0	0	0	0	0	0	0	0	0	0	0	0	0	0	0	0	0	0	0	0	0	0	0	0	0	0	0	0	0	0	0	0	0	0	0	0	0	0	0	0	0	0	0	0
OTU546	d__Bacteria; p__Bacteroidetes; c__Bacteroidia; o__Bacteroidales; f__Prevotellaceae; g__Paraprevotella	0	0	0	0	0	0	0	0	0	0	0	0	0	0	0	0	0	0	0	0	0	0	0	0	0	0	0	0	0	0	0	0	0	0	0	0	0	0	0	0	0	0	0	0	0	0	0	0
OTU571	d__Bacteria; p__Bacteroidetes; c__Bacteroidia; o__Bacteroidales; f__Prevotellaceae; g__Paraprevotella	0	0	0	0	1	0	139	0	0	0	0	0	0	0	0	0	0	0	0	0	0	0	0	0	0	0	0	0	0	0	0	0	0	0	0	0	0	0	0	0	0	0	0	0	0	0	0	0
OTU145	d__Bacteria; p__Bacteroidetes; c__Bacteroidia; o__Bacteroidales; f__Prevotellaceae; g__Alloprevotella	0	0	0	0	0	0	0	0	0	0	0	0	0	0	0	0	0	0	0	0	0	0	0	0	0	0	0	0	0	0	0	0	0	0	45	591	0	0	0	0	0	0	0	0	0	0	2	0
OTU157	d__Bacteria; p__Bacteroidetes; c__Bacteroidia; o__Bacteroidales; f__Prevotellaceae; g__Alloprevotella	0	0	0	0	0	0	0	0	0	0	0	0	0	0	0	0	0	0	0	1	0	0	0	0	0	0	0	0	0	0	0	0	0	0	0	0	0	0	0	0	0	0	0	0	0	0	0	0
OTU383	d__Bacteria; p__Bacteroidetes; c__Bacteroidia; o__Bacteroidales; f__Prevotellaceae	0	0	0	0	0	0	0	0	0	0	0	0	0	0	0	0	0	0	0	0	0	0	0	14	0	0	0	0	0	0	0	0	0	0	6	38	0	0	0	0	0	0	0	0	0	0	2	0
OTU24	d__Bacteria; p__Bacteroidetes; c__Bacteroidia; o__Bacteroidales; f__Porphyromonadaceae; g__Parabacteroides	33	64	1099	102	3	93	156	1	244	0	3	893	6	433	0	9	110	0	0	7	38	0	497	102	27	0	11	105	0	0	306	236	53	0	8	20	2	2100	4	108	7	200	116	0	31	1	49	61
OTU59	d__Bacteria; p__Bacteroidetes; c__Bacteroidia; o__Bacteroidales; f__Porphyromonadaceae; g__Parabacteroides	70	21	47	40	48	140	62	226	37	103	25	15	102	34	91	11	24	44	494	26	10	24	0	87	26	29	63	50	20	25	105	96	114	0	4	8	17	99	2	46	66	8	134	0	62	1	9	22
OTU178	d__Bacteria; p__Bacteroidetes; c__Bacteroidia; o__Bacteroidales; f__Porphyromonadaceae; g__Parabacteroides	0	3	0	0	1	0	1	0	1	0	13	122	2	0	5	0	49	13	17	2	0	0	0	9	140	0	0	13	3	5	7	5	0	0	0	0	0	0	0	0	2	0	6	0	0	0	1	1
OTU246	d__Bacteria; p__Bacteroidetes; c__Bacteroidia; o__Bacteroidales; f__Porphyromonadaceae; g__Parabacteroides	1	120	1187	395	6	4	16	9	41	16	54	174	11	119	16	5	136	27	76	41	4	2	0	30	72	113	32	32	242	70	6	234	3	0	3	7	147	2238	0	411	4	84	1	0	34	2	16	3
OTU286	d__Bacteria; p__Bacteroidetes; c__Bacteroidia; o__Bacteroidales; f__Porphyromonadaceae; g__Parabacteroides	3	0	51	0	0	0	0	47	0	18	4	76	0	4	8	0	0	0	4	46	0	7	0	0	14	51	1	0	3	8	66	0	0	67	0	0	0	106	0	0	0	3	0	0	0	0	0	0
OTU416	d__Bacteria; p__Bacteroidetes; c__Bacteroidia; o__Bacteroidales; f__Porphyromonadaceae; g__Parabacteroides	0	0	0	0	2	0	0	0	0	0	0	0	0	0	0	0	0	0	0	16	0	0	0	4	13	72	0	0	0	0	0	0	0	0	0	0	0	0	0	0	8	0	0	0	0	0	0	0
OTU427	d__Bacteria; p__Bacteroidetes; c__Bacteroidia; o__Bacteroidales; f__Porphyromonadaceae; g__Parabacteroides	0	0	0	0	0	0	2	0	0	0	0	3	0	0	2	0	6	1	0	0	0	0	0	1	9	0	0	1	0	0	1	0	0	0	0	0	0	0	0	0	0	1	1	0	0	0	0	1
OTU431	d__Bacteria; p__Bacteroidetes; c__Bacteroidia; o__Bacteroidales; f__Porphyromonadaceae; g__Parabacteroides	0	0	0	0	0	0	0	0	0	0	0	0	0	0	0	0	0	0	0	1	0	0	0	0	0	0	0	0	0	0	0	0	0	0	0	0	0	0	0	0	0	0	0	0	0	0	0	0
OTU450	d__Bacteria; p__Bacteroidetes; c__Bacteroidia; o__Bacteroidales; f__Porphyromonadaceae; g__Parabacteroides	2	0	2	0	0	0	0	5	0	6	2	2	0	0	0	0	2	0	18	1	0	2	0	0	1	9	0	0	4	0	1	0	1	0	0	0	0	5	0	0	1	7	0	0	0	0	0	0
OTU551	d__Bacteria; p__Bacteroidetes; c__Bacteroidia; o__Bacteroidales; f__Porphyromonadaceae; g__Parabacteroides	2	7	75	8	0	5	19	0	21	117	0	56	0	38	75	0	42	20	48	2	0	82	26	6	1	1	1	24	0	97	22	21	4	1	0	2	0	128	0	11	0	31	7	0	2	0	2	5
OTU557	d__Bacteria; p__Bacteroidetes; c__Bacteroidia; o__Bacteroidales; f__Porphyromonadaceae; g__Parabacteroides	0	0	0	0	0	0	0	0	0	0	0	1	0	0	0	0	0	1	0	0	0	0	0	0	0	0	0	0	0	0	0	0	0	0	0	0	0	0	0	0	0	0	0	0	0	0	1	0
OTU108	d__Bacteria; p__Bacteroidetes; c__Bacteroidia; o__Bacteroidales; f__Porphyromonadaceae; g__Odoribacter	50	29	0	0	67	99	99	0	101	40	21	0	1	34	228	0	64	0	13	68	25	122	1	94	104	0	7	123	0	25	182	75	78	0	4	27	0	0	1	0	79	164	26	0	46	0	21	14
OTU401	d__Bacteria; p__Bacteroidetes; c__Bacteroidia; o__Bacteroidales; f__Porphyromonadaceae; g__Odoribacter	0	0	0	0	0	0	0	0	0	0	3	0	0	0	3	0	11	0	0	0	0	0	0	0	6	0	0	0	0	0	0	0	0	0	0	0	0	0	0	0	0	0	0	0	0	0	0	0
OTU189	d__Bacteria; p__Bacteroidetes; c__Bacteroidia; o__Bacteroidales; f__Porphyromonadaceae; g__Coprobacter	0	0	0	0	0	50	13	0	16	0	0	0	0	2	0	0	16	0	0	218	0	0	0	343	45	0	0	0	0	6	0	0	0	0	5	0	0	0	0	0	0	44	0	0	2	0	8	33
OTU460	d__Bacteria; p__Bacteroidetes; c__Bacteroidia; o__Bacteroidales; f__Porphyromonadaceae; g__Coprobacter	0	0	0	0	0	0	0	0	0	0	0	0	0	0	0	0	0	0	0	0	0	0	0	0	114	0	0	0	0	0	0	0	0	0	0	0	0	0	0	0	0	0	0	0	0	0	0	0
OTU168	d__Bacteria; p__Bacteroidetes; c__Bacteroidia; o__Bacteroidales; f__Porphyromonadaceae; g__Butyricimonas	16	0	0	0	6	0	0	0	15	104	0	174	2	2	15	0	0	0	0	89	2	3	0	17	8	40	2	92	0	17	0	13	32	0	1	15	0	0	0	0	9	1	8	0	2	0	8	11
OTU194	d__Bacteria; p__Bacteroidetes; c__Bacteroidia; o__Bacteroidales; f__Porphyromonadaceae; g__Butyricimonas	0	41	0	0	0	0	40	0	0	0	0	0	0	0	0	0	0	0	0	0	0	0	0	0	0	0	0	0	0	0	44	0	0	2	0	0	0	0	0	0	0	0	0	0	0	0	0	0
OTU234	d__Bacteria; p__Bacteroidetes; c__Bacteroidia; o__Bacteroidales; f__Porphyromonadaceae; g__Butyricimonas	7	0	0	0	13	0	33	307	0	0	0	0	2	0	0	0	14	0	13	21	0	34	0	20	18	39	2	0	0	3	32	5	5	0	0	2	0	0	0	0	14	0	2	0	8	1	12	5
OTU265	d__Bacteria; p__Bacteroidetes; c__Bacteroidia; o__Bacteroidales; f__Porphyromonadaceae; g__Butyricimonas	0	0	0	0	2	0	8	38	0	0	0	0	0	1	7	0	9	0	0	14	0	17	0	0	5	62	2	0	0	3	2	0	0	0	0	3	0	0	0	0	0	3	4	0	8	0	3	2
OTU278	d__Bacteria; p__Bacteroidetes; c__Bacteroidia; o__Bacteroidales; f__Porphyromonadaceae; g__Butyricimonas	0	0	0	0	0	0	0	0	0	0	16	0	0	18	3	0	0	0	0	0	0	2	0	0	0	0	0	0	0	0	0	172	0	0	0	0	0	0	0	0	0	0	0	0	0	0	0	0
OTU408	d__Bacteria; p__Bacteroidetes; c__Bacteroidia; o__Bacteroidales; f__Porphyromonadaceae; g__Butyricimonas	1	0	0	8	4	0	0	0	0	0	1	0	0	0	1	0	120	0	0	15	2	0	0	9	10	0	0	4	0	0	0	1	1	0	1	10	0	0	0	4	1	0	0	0	0	0	3	0
OTU481	d__Bacteria; p__Bacteroidetes; c__Bacteroidia; o__Bacteroidales; f__Porphyromonadaceae; g__Butyricimonas	0	0	0	0	0	0	0	0	0	0	0	0	0	0	0	0	0	0	0	0	0	0	0	0	1	0	0	2	0	0	0	0	0	0	0	0	0	0	0	0	0	0	0	0	0	0	0	2
OTU499	d__Bacteria; p__Bacteroidetes; c__Bacteroidia; o__Bacteroidales; f__Porphyromonadaceae; g__Butyricimonas	1	0	0	0	0	0	44	33	0	0	0	0	0	0	0	0	24	0	3	17	0	3	0	21	13	12	4	0	0	6	3	5	0	0	1	0	0	0	0	0	1	0	0	0	8	0	0	1
OTU112	d__Bacteria; p__Bacteroidetes; c__Bacteroidia; o__Bacteroidales; f__Porphyromonadaceae; g__Barnesiella	0	0	0	0	0	0	0	0	0	0	0	0	0	0	0	0	0	0	0	0	0	0	0	0	0	0	0	0	0	0	0	0	0	0	0	0	0	0	0	0	0	0	0	0	0	0	0	0
OTU130	d__Bacteria; p__Bacteroidetes; c__Bacteroidia; o__Bacteroidales; f__Porphyromonadaceae; g__Barnesiella	0	77	0	1	0	0	101	0	418	106	98	0	3	14	302	0	518	0	115	0	21	1	0	292	282	292	0	26	0	145	916	212	0	0	21	192	0	2	0	0	0	466	0	0	0	0	67	24
OTU306	d__Bacteria; p__Bacteroidetes; c__Bacteroidia; o__Bacteroidales; f__Porphyromonadaceae; g__Barnesiella	0	0	0	0	0	0	158	0	0	0	0	0	0	0	0	0	0	0	0	0	0	0	0	0	37	0	0	0	0	0	0	0	0	0	0	0	0	0	0	0	0	0	0	0	0	0	0	0
OTU479	d__Bacteria; p__Bacteroidetes; c__Bacteroidia; o__Bacteroidales; f__Porphyromonadaceae; g__Barnesiella	0	0	0	0	0	0	0	0	0	0	0	0	4	0	0	0	0	0	0	0	0	0	0	0	0	0	0	0	0	0	0	0	0	0	0	0	0	0	0	0	0	1	0	0	0	0	0	0
OTU135	d__Bacteria; p__Bacteroidetes; c__Bacteroidia; o__Bacteroidales; f__Porphyromonadaceae	0	0	0	0	0	0	0	0	0	0	1	0	0	0	0	0	0	0	0	0	0	0	0	0	0	0	0	0	0	0	0	0	0	0	0	0	0	0	9	0	0	0	0	0	0	0	0	0
OTU165	d__Bacteria; p__Bacteroidetes; c__Bacteroidia; o__Bacteroidales; f__Porphyromonadaceae	0	0	0	0	0	0	0	0	0	0	0	0	0	0	0	0	0	0	0	0	0	0	0	0	0	0	0	0	0	0	0	0	0	0	0	0	0	0	0	0	0	0	0	0	0	0	0	0
OTU166	d__Bacteria; p__Bacteroidetes; c__Bacteroidia; o__Bacteroidales; f__Porphyromonadaceae	0	0	0	0	0	0	0	0	0	0	0	0	0	0	0	0	0	0	0	0	0	0	0	0	0	0	0	0	0	0	0	0	0	0	0	0	0	0	0	0	0	0	0	0	0	0	0	0
OTU293	d__Bacteria; p__Bacteroidetes; c__Bacteroidia; o__Bacteroidales; f__Porphyromonadaceae	0	0	0	0	0	0	0	0	0	0	0	0	0	84	0	0	0	0	0	0	0	0	0	62	24	0	0	145	0	0	0	0	0	0	0	0	0	0	0	0	0	0	12	0	0	0	0	0
OTU297	d__Bacteria; p__Bacteroidetes; c__Bacteroidia; o__Bacteroidales; f__Porphyromonadaceae	0	0	0	0	0	0	0	0	0	1	0	1	7	0	0	0	0	0	0	0	1	0	0	0	0	1	0	0	0	0	0	0	0	0	0	0	0	0	0	0	0	0	0	0	0	0	0	0
OTU303	d__Bacteria; p__Bacteroidetes; c__Bacteroidia; o__Bacteroidales; f__Porphyromonadaceae	0	0	0	0	0	0	13	0	0	0	0	0	0	8	0	0	1	0	0	0	0	0	0	0	3	0	0	0	0	12	0	0	0	0	0	0	0	0	0	0	0	0	0	0	0	0	0	1
OTU318	d__Bacteria; p__Bacteroidetes; c__Bacteroidia; o__Bacteroidales; f__Porphyromonadaceae	0	0	0	0	0	0	0	1	0	0	0	0	0	0	0	0	0	0	0	0	50	0	0	0	0	0	0	0	0	0	0	0	0	0	37	414	0	0	0	0	0	0	0	0	0	0	2	0
OTU345	d__Bacteria; p__Bacteroidetes; c__Bacteroidia; o__Bacteroidales; f__Porphyromonadaceae	0	0	0	0	0	0	0	0	0	0	0	0	0	0	0	0	0	0	0	0	0	0	0	0	7	0	0	0	0	0	40	0	0	0	0	0	0	0	0	0	0	0	0	0	0	0	0	0
OTU348	d__Bacteria; p__Bacteroidetes; c__Bacteroidia; o__Bacteroidales; f__Porphyromonadaceae	0	0	1	0	0	0	0	0	0	0	0	0	9	0	0	1	0	0	0	0	0	0	0	1	0	0	0	0	0	0	0	0	0	0	0	1	0	0	0	0	0	0	0	0	0	0	0	0
OTU385	d__Bacteria; p__Bacteroidetes; c__Bacteroidia; o__Bacteroidales; f__Porphyromonadaceae	0	0	0	0	0	0	0	0	0	0	0	0	0	0	0	0	0	0	0	0	0	0	0	0	91	0	0	0	0	0	0	0	0	0	0	0	0	0	0	0	0	0	0	0	0	0	0	0
OTU442	d__Bacteria; p__Bacteroidetes; c__Bacteroidia; o__Bacteroidales; f__Porphyromonadaceae	0	0	0	0	0	0	0	0	0	0	0	0	9	0	0	0	0	0	0	0	0	0	0	0	0	0	0	0	0	0	0	0	0	0	0	0	0	0	0	0	0	0	0	0	0	0	0	0
OTU451	d__Bacteria; p__Bacteroidetes; c__Bacteroidia; o__Bacteroidales; f__Porphyromonadaceae	0	0	0	0	0	0	0	0	0	0	0	0	0	0	0	0	0	0	0	0	0	0	0	0	73	0	0	2	0	0	0	0	0	0	0	0	0	0	0	0	0	0	0	0	0	0	0	0
OTU508	d__Bacteria; p__Bacteroidetes; c__Bacteroidia; o__Bacteroidales; f__Porphyromonadaceae	0	0	0	0	0	0	0	0	0	0	0	1	4	0	0	0	0	0	0	0	0	0	0	0	0	0	0	0	0	0	0	0	0	0	0	0	0	0	0	0	0	0	0	0	0	0	0	0
OTU512	d__Bacteria; p__Bacteroidetes; c__Bacteroidia; o__Bacteroidales; f__Porphyromonadaceae	0	0	0	0	0	0	0	0	0	0	0	0	0	0	0	0	0	0	0	0	0	0	0	0	0	0	0	0	0	0	0	0	0	0	0	0	0	0	0	0	0	0	0	0	0	0	0	0
OTU558	d__Bacteria; p__Bacteroidetes; c__Bacteroidia; o__Bacteroidales; f__Porphyromonadaceae	0	0	0	0	0	0	0	0	0	0	0	0	0	0	0	0	0	0	0	0	0	0	0	0	0	0	0	0	0	0	0	0	0	0	0	0	0	0	0	0	0	0	0	0	0	0	12	0
OTU559	d__Bacteria; p__Bacteroidetes; c__Bacteroidia; o__Bacteroidales; f__Porphyromonadaceae	0	0	0	0	0	0	0	0	0	0	0	0	0	0	0	0	0	0	0	0	0	0	0	0	120	0	0	0	0	0	0	0	0	0	0	0	0	0	0	0	0	0	0	0	0	0	0	0
OTU564	d__Bacteria; p__Bacteroidetes; c__Bacteroidia; o__Bacteroidales; f__Porphyromonadaceae	0	0	0	0	0	0	0	0	0	0	0	0	1	0	0	0	0	0	0	0	0	0	0	0	0	0	0	0	0	0	0	0	0	0	0	0	0	0	0	0	0	0	0	0	0	0	0	0
OTU593	d__Bacteria; p__Bacteroidetes; c__Bacteroidia; o__Bacteroidales; f__Porphyromonadaceae	0	0	0	0	0	0	0	0	0	0	0	0	2	0	0	0	0	0	0	0	0	0	1	0	0	0	0	0	0	0	0	0	0	0	0	0	0	0	0	0	0	0	0	0	0	0	0	0
OTU594	d__Bacteria; p__Bacteroidetes; c__Bacteroidia; o__Bacteroidales; f__Porphyromonadaceae	0	0	0	0	0	0	0	0	0	0	0	0	4	0	0	0	0	0	0	0	0	0	0	0	0	0	0	0	0	0	0	0	0	0	0	0	0	0	0	0	0	0	0	0	0	0	0	0
OTU1	d__Bacteria; p__Bacteroidetes; c__Bacteroidia; o__Bacteroidales; f__Bacteroidaceae; g__Bacteroides	567	2803	3	395	336	787	3317	861	977	2036	107	6860	13451	777	2435	1009	2172	1787	4236	2440	423	2565	9006	1664	338	3555	3130	2645	10465	7132	762	527	988	17851	146	133	49	2	23	446	437	4669	1750	2	4939	18	1233	635
OTU4	d__Bacteria; p__Bacteroidetes; c__Bacteroidia; o__Bacteroidales; f__Bacteroidaceae; g__Bacteroides	5085	0	1	7208	5486	9107	1346	3	381	3	622	0	19	3235	4	13511	712	2870	4	3164	0	0	0	1	152	743	12986	592	0	0	285	1233	10974	0	5230	1	1	5	5	8346	6462	2	2	0	2	88	1099	2
OTU9	d__Bacteria; p__Bacteroidetes; c__Bacteroidia; o__Bacteroidales; f__Bacteroidaceae; g__Bacteroides	243	61	667	227	773	1770	1172	845	1022	712	55	790	69	103	329	3	2033	1169	206	1849	52	1641	1408	98	94	1007	206	752	177	462	559	117	384	1480	24	162	4246	1023	1	207	898	3844	552	0	464	1	193	434
OTU10	d__Bacteria; p__Bacteroidetes; c__Bacteroidia; o__Bacteroidales; f__Bacteroidaceae; g__Bacteroides	51	78	445	168	30	50	116	294	46	56	82	188	54	95	220	4	74	94	275	187	14	79	183	301	129	104	26	38	526	157	396	24	82	375	9	2	1560	809	4	151	31	272	162	0	287	2	45	31
OTU15	d__Bacteria; p__Bacteroidetes; c__Bacteroidia; o__Bacteroidales; f__Bacteroidaceae; g__Bacteroides	338	0	0	441	551	888	1293	0	1052	1	2	2607	404	225	456	0	135	417	339	2152	3	2223	10	74	54	0	284	637	938	889	102	24	554	22	108	1	93	1	0	505	603	2	4446	1	1759	1	174	1006
OTU28	d__Bacteria; p__Bacteroidetes; c__Bacteroidia; o__Bacteroidales; f__Bacteroidaceae; g__Bacteroides	396	0	0	3140	947	3	648	1	346	0	139	0	2486	3	567	0	660	1547	5600	1	473	834	0	1	332	2	1694	187	0	1	0	76	639	0	0	0	0	0	42	3265	1145	1305	299	0	1193	3	1	0
OTU29	d__Bacteria; p__Bacteroidetes; c__Bacteroidia; o__Bacteroidales; f__Bacteroidaceae; g__Bacteroides	1	0	0	0	964	1	1621	0	1	0	2	0	7	2	3	2268	0	1	1	1	1	2705	0	0	23	935	0	0	1	0	1	719	0	0	0	0	0	0	0	1	1194	0	0	1	0	10	3733	0
OTU33	d__Bacteria; p__Bacteroidetes; c__Bacteroidia; o__Bacteroidales; f__Bacteroidaceae; g__Bacteroides	0	89	2703	47	0	3	0	178	0	63	1	45	16	78	1	2	0	0	1	4	9	1	412	0	2	1039	1	87	502	24	2	0	2	0	12	0	3838	3581	0	28	0	23	38	3341	8	1	116	4
OTU55	d__Bacteria; p__Bacteroidetes; c__Bacteroidia; o__Bacteroidales; f__Bacteroidaceae; g__Bacteroides	1	0	5	9	16	11	20	4	12	105	15	177	0	0	142	0	196	8	15	21	2	223	40	64	58	393	5	24	27	12	174	7	4	5	0	21	942	3	0	12	21	145	16	1	27	3	180	272
OTU61	d__Bacteria; p__Bacteroidetes; c__Bacteroidia; o__Bacteroidales; f__Bacteroidaceae; g__Bacteroides	48	237	123	187	184	136	49	434	138	140	11	254	111	277	454	14	74	170	579	60	23	160	1033	180	13	262	81	62	3108	546	96	20	64	310	14	38	545	274	1	178	230	379	317	0	894	0	33	24
OTU78	d__Bacteria; p__Bacteroidetes; c__Bacteroidia; o__Bacteroidales; f__Bacteroidaceae; g__Bacteroides	0	0	1	0	0	0	253	1	639	0	0	0	226	0	0	0	187	0	0	583	0	1	3	0	2	0	0	0	0	538	3	69	0	1292	0	3	0	0	0	0	0	0	2	0	1	0	26	14
OTU84	d__Bacteria; p__Bacteroidetes; c__Bacteroidia; o__Bacteroidales; f__Bacteroidaceae; g__Bacteroides	29	156	7	28	31	68	164	368	252	136	21	458	172	27	184	4	50	100	209	261	10	7	117	92	42	31	53	41	116	360	211	36	46	51	4	35	1383	22	4	13	22	118	255	0	129	0	90	35
OTU100	d__Bacteria; p__Bacteroidetes; c__Bacteroidia; o__Bacteroidales; f__Bacteroidaceae; g__Bacteroides	0	0	0	43	7	0	31	1	1	114	36	0	9	9	17	0	1	46	19	0	7	0	1	0	0	0	0	8	2	28	0	0	0	1	1	3	5	0	1	33	24	0	25	0	2	0	33	7
OTU120	d__Bacteria; p__Bacteroidetes; c__Bacteroidia; o__Bacteroidales; f__Bacteroidaceae; g__Bacteroides	3	0	0	8	0	5	21	1	38	7	1	31	36	5	32	0	19	17	304	54	2	0	0	0	2	0	0	7	5	4	4	0	7	0	1	8	0	0	0	12	5	1	18	0	147	1	25	11
OTU125	d__Bacteria; p__Bacteroidetes; c__Bacteroidia; o__Bacteroidales; f__Bacteroidaceae; g__Bacteroides	0	0	0	0	0	0	1	0	0	0	0	0	0	0	0	0	0	0	0	0	0	0	0	0	0	0	0	0	0	0	1	0	0	0	0	0	0	0	0	0	0	0	2	2680	0	0	0	0
OTU126	d__Bacteria; p__Bacteroidetes; c__Bacteroidia; o__Bacteroidales; f__Bacteroidaceae; g__Bacteroides	0	0	0	0	0	0	0	0	0	0	0	0	0	0	1	0	0	0	0	0	0	0	0	0	0	0	0	639	1	1	0	876	0	0	0	2	0	0	0	0	0	0	0	0	0	0	0	246
OTU144	d__Bacteria; p__Bacteroidetes; c__Bacteroidia; o__Bacteroidales; f__Bacteroidaceae; g__Bacteroides	0	0	0	0	0	0	0	0	0	0	0	0	0	0	0	0	0	0	0	0	0	0	0	0	0	0	0	0	0	0	0	0	0	0	0	0	0	0	0	0	0	0	0	0	0	0	0	0
OTU164	d__Bacteria; p__Bacteroidetes; c__Bacteroidia; o__Bacteroidales; f__Bacteroidaceae; g__Bacteroides	0	0	0	0	0	0	0	0	0	0	0	0	0	0	0	0	0	0	0	0	0	0	0	0	0	0	0	0	0	0	0	0	0	0	0	0	0	0	0	0	0	0	0	0	0	0	0	1
OTU176	d__Bacteria; p__Bacteroidetes; c__Bacteroidia; o__Bacteroidales; f__Bacteroidaceae; g__Bacteroides	0	0	0	0	0	0	0	0	0	0	0	0	1	0	0	0	0	0	0	0	0	0	0	0	0	0	0	0	0	0	0	0	0	0	0	0	0	0	0	0	0	0	0	0	0	0	0	0
OTU184	d__Bacteria; p__Bacteroidetes; c__Bacteroidia; o__Bacteroidales; f__Bacteroidaceae; g__Bacteroides	17	0	2	5	1	18	2	37	2	6	0	40	1	1	10	0	5	1	0	58	1	17	9	3	2	10	0	1	6	6	25	0	8	0	2	1	10	1	0	3	3	20	7	0	1	0	4	2
OTU255	d__Bacteria; p__Bacteroidetes; c__Bacteroidia; o__Bacteroidales; f__Bacteroidaceae; g__Bacteroides	0	0	0	0	7	0	0	0	0	0	0	151	0	0	20	0	0	0	0	0	0	0	0	0	0	0	0	0	0	0	0	0	0	0	0	0	0	0	0	0	8	0	0	0	0	0	0	0
OTU279	d__Bacteria; p__Bacteroidetes; c__Bacteroidia; o__Bacteroidales; f__Bacteroidaceae; g__Bacteroides	0	0	0	0	0	0	0	0	34	0	0	0	0	2	0	0	0	0	0	88	1	0	0	15	1	0	0	0	0	9	0	0	0	0	0	0	0	0	0	0	0	0	10	0	0	0	23	0
OTU304	d__Bacteria; p__Bacteroidetes; c__Bacteroidia; o__Bacteroidales; f__Bacteroidaceae; g__Bacteroides	0	0	0	0	6	0	0	0	0	0	28	0	0	0	0	0	0	0	0	3	0	0	0	0	14	0	0	0	0	0	0	0	0	0	0	0	0	0	0	0	12	0	1	0	0	0	20	0
OTU320	d__Bacteria; p__Bacteroidetes; c__Bacteroidia; o__Bacteroidales; f__Bacteroidaceae; g__Bacteroides	0	0	0	0	13	0	0	0	0	0	2	0	0	0	10	0	0	0	0	0	0	0	0	0	0	0	4	1	0	0	0	0	0	0	0	0	0	0	0	0	29	0	0	0	0	0	0	0
OTU350	d__Bacteria; p__Bacteroidetes; c__Bacteroidia; o__Bacteroidales; f__Bacteroidaceae; g__Bacteroides	0	0	0	1	116	0	14	0	0	0	0	0	0	0	0	241	0	0	0	0	0	0	0	0	25	1	0	0	0	0	0	8	0	0	0	0	0	0	0	0	130	0	0	0	1	1	105	0
OTU378	d__Bacteria; p__Bacteroidetes; c__Bacteroidia; o__Bacteroidales; f__Bacteroidaceae; g__Bacteroides	3	1	0	0	3	7	19	1	7	0	0	86	32	3	19	0	10	2	2	143	0	33	6	0	1	0	7	51	50	28	1	0	9	3	1	0	0	0	0	5	9	30	58	0	45	0	3	35
OTU390	d__Bacteria; p__Bacteroidetes; c__Bacteroidia; o__Bacteroidales; f__Bacteroidaceae; g__Bacteroides	11	184	0	46	42	114	2	321	85	112	22	60	18	40	20	0	23	4	3	19	58	4	11	129	24	23	3	62	4	34	47	19	37	7	2	6	20	0	3	82	33	154	56	0	21	1	3	2
OTU394	d__Bacteria; p__Bacteroidetes; c__Bacteroidia; o__Bacteroidales; f__Bacteroidaceae; g__Bacteroides	0	0	0	0	0	0	0	0	0	0	0	0	0	0	0	0	0	0	1	0	1	0	0	0	0	0	0	0	0	0	0	0	0	0	0	0	0	1	0	0	0	0	0	0	0	0	0	0
OTU429	d__Bacteria; p__Bacteroidetes; c__Bacteroidia; o__Bacteroidales; f__Bacteroidaceae; g__Bacteroides	2	0	0	1	31	2	22	286	1	0	19	0	0	0	84	0	9	0	23	4	0	0	0	0	21	0	0	0	0	0	0	0	2	0	0	0	1	1	0	0	41	0	0	0	0	0	0	0
OTU443	d__Bacteria; p__Bacteroidetes; c__Bacteroidia; o__Bacteroidales; f__Bacteroidaceae; g__Bacteroides	73	201	0	746	503	1606	17	1778	1583	4552	151	111	220	6	87	2	10	17	14	20	3	7	194	21	0	9	10	71	161	195	1146	17	113	148	15	2	85	1	1	891	654	2187	89	0	35	0	5	7
OTU452	d__Bacteria; p__Bacteroidetes; c__Bacteroidia; o__Bacteroidales; f__Bacteroidaceae; g__Bacteroides	2	3	0	0	3	3	19	0	4	0	0	101	44	3	17	3	6	3	13	78	0	67	19	0	0	5	9	27	100	64	0	0	5	49	1	0	0	0	0	2	0	4	96	0	35	0	2	29
OTU473	d__Bacteria; p__Bacteroidetes; c__Bacteroidia; o__Bacteroidales; f__Bacteroidaceae; g__Bacteroides	1	0	0	0	1	5	3	0	1	0	0	7	6	0	5	0	1	0	5	4	1	5	0	1	0	0	1	1	3	1	0	1	3	0	0	0	0	0	0	1	6	0	39	0	2	0	0	3
OTU476	d__Bacteria; p__Bacteroidetes; c__Bacteroidia; o__Bacteroidales; f__Bacteroidaceae; g__Bacteroides	34	0	0	136	118	5	6	0	6	0	0	0	0	2	0	0	15	45	0	3	0	6	0	0	2	0	381	5	0	0	0	1	145	0	0	0	0	0	0	249	117	0	0	0	0	0	1	0
OTU485	d__Bacteria; p__Bacteroidetes; c__Bacteroidia; o__Bacteroidales; f__Bacteroidaceae; g__Bacteroides	0	1	23	0	7	3	0	20	2	7	0	12	1	1	12	0	17	3	1	9	1	13	14	9	7	21	0	1	8	3	18	1	2	4	0	1	568	37	0	0	11	28	9	0	3	0	10	41
OTU486	d__Bacteria; p__Bacteroidetes; c__Bacteroidia; o__Bacteroidales; f__Bacteroidaceae; g__Bacteroides	0	15	0	3	6	11	0	33	8	23	1	49	24	6	13	0	21	3	4	12	0	1	0	16	0	1	14	16	56	22	10	3	3	13	0	0	0	0	0	12	2	24	19	0	7	0	3	4
OTU498	d__Bacteria; p__Bacteroidetes; c__Bacteroidia; o__Bacteroidales; f__Bacteroidaceae; g__Bacteroides	0	6	156	7	0	1	1	9	0	1	0	5	2	6	3	0	2	2	0	3	0	1	0	3	1	1	1	3	29	3	1	0	1	0	0	0	60	584	0	4	0	9	12	0	2	0	1	0
OTU516	d__Bacteria; p__Bacteroidetes; c__Bacteroidia; o__Bacteroidales; f__Bacteroidaceae; g__Bacteroides	11	0	0	0	20	17	6	8	26	6	5	89	203	22	90	0	15	14	15	67	2	60	35	14	51	1	4	22	49	30	15	6	19	3	4	14	2930	0	0	0	25	16	68	0	23	0	12	182
OTU578	d__Bacteria; p__Bacteroidetes; c__Bacteroidia; o__Bacteroidales; f__Bacteroidaceae; g__Bacteroides	0	0	0	0	1	1	0	0	0	0	0	0	6	0	0	0	2	0	0	0	0	0	3	1	0	0	2	0	1	2	0	0	0	3	0	0	0	0	0	1	0	1	1	0	1	0	0	0
OTU588	d__Bacteria; p__Bacteroidetes; c__Bacteroidia; o__Bacteroidales; f__Bacteroidaceae; g__Bacteroides	76	0	0	51	248	378	25	0	21	0	4	0	0	49	1	3	53	91	0	418	0	0	0	0	1	1	186	41	0	0	12	9	261	0	38	0	0	0	0	106	237	0	0	0	1	3	34	0
OTU219	d__Bacteria; p__Bacteroidetes; c__Bacteroidia; o__Bacteroidales	0	0	0	0	0	0	0	0	0	0	0	0	0	0	0	0	0	0	0	0	0	0	0	0	0	0	0	0	0	1	0	0	0	0	43	436	0	0	0	0	0	0	0	0	0	0	1	0
OTU556	d__Bacteria; p__Bacteroidetes; c__Bacteroidia; o__Bacteroidales	7	1	3	0	0	0	0	0	0	0	0	1	2	0	0	0	0	0	0	0	0	0	5	0	0	1	0	0	0	0	0	0	0	2	0	0	0	0	0	0	1	0	0	0	0	0	0	0
OTU570	d__Bacteria; p__Bacteroidetes; c__Bacteroidia; o__Bacteroidales	0	0	0	0	0	0	0	0	0	0	0	0	0	0	0	0	0	0	0	0	0	0	0	0	0	0	0	0	0	0	0	0	0	0	0	0	0	0	0	0	0	0	0	0	0	0	0	0
OTU572	d__Bacteria; p__Bacteroidetes; c__Bacteroidia; o__Bacteroidales	0	1	0	0	0	0	0	0	0	0	0	0	0	0	0	0	0	0	0	0	0	0	0	0	0	0	0	1	1	1	0	0	0	0	0	0	0	1	0	0	0	0	0	0	0	0	0	0
OTU566	d__Bacteria; p__Bacteroidetes	0	2	0	0	0	0	0	0	0	0	0	0	0	0	0	0	0	0	0	0	0	0	0	0	0	0	0	0	0	0	0	0	0	0	0	0	0	0	0	0	0	0	0	0	0	0	0	0
OTU281	d__Bacteria; p__Actinobacteria; c__Actinobacteria; o__Coriobacteriales; f__Coriobacteriaceae; g__Slackia	0	0	0	0	0	0	0	0	0	0	0	0	0	0	0	0	0	0	0	0	0	0	0	0	0	0	0	0	0	0	0	0	0	0	0	0	0	0	0	0	0	0	0	0	0	5	0	0
OTU456	d__Bacteria; p__Actinobacteria; c__Actinobacteria; o__Coriobacteriales; f__Coriobacteriaceae; g__Senegalimassilia	0	0	0	0	0	0	0	0	0	0	0	0	0	0	0	0	0	0	0	0	0	0	0	0	11	0	0	40	0	0	0	5	0	0	3	15	0	0	0	0	0	0	0	0	0	0	0	0
OTU406	d__Bacteria; p__Actinobacteria; c__Actinobacteria; o__Coriobacteriales; f__Coriobacteriaceae; g__Olsenella	0	0	0	0	0	0	0	0	0	0	0	0	0	0	0	0	0	0	0	0	0	0	0	0	0	0	0	0	0	0	0	16	0	0	0	0	0	0	0	0	0	0	0	0	0	0	0	0
OTU409	d__Bacteria; p__Actinobacteria; c__Actinobacteria; o__Coriobacteriales; f__Coriobacteriaceae; g__Olsenella	0	0	0	0	0	0	0	0	0	0	0	0	0	0	0	0	0	0	0	0	0	0	0	0	0	9	0	1	0	4	0	0	0	0	0	0	0	0	0	0	0	0	0	0	0	0	0	35
OTU496	d__Bacteria; p__Actinobacteria; c__Actinobacteria; o__Coriobacteriales; f__Coriobacteriaceae; g__Gordonibacter	0	0	0	1	0	0	0	0	3	4	0	3	0	0	0	0	1	5	0	1	0	5	0	0	0	2	0	2	0	0	1	0	6	0	0	0	0	0	0	2	0	1	0	0	1	0	0	0
OTU181	d__Bacteria; p__Actinobacteria; c__Actinobacteria; o__Coriobacteriales; f__Coriobacteriaceae; g__Eggerthella	3	12	6	61	3	30	1	4	1	0	2	20	1	0	16	0	0	23	21	2	0	6	4	1	0	2	2	0	60	12	1	0	1	6	0	0	86	12	0	81	2	3	0	48	8	0	0	0
OTU73	d__Bacteria; p__Actinobacteria; c__Actinobacteria; o__Coriobacteriales; f__Coriobacteriaceae; g__Collinsella	0	198	0	0	1	0	221	0	136	52	98	0	2	80	35	114	51	33	0	9	107	74	0	45	13	72	14	219	0	133	173	34	0	1	204	16	0	0	29	0	0	82	245	0	134	20	80	17
OTU208	d__Bacteria; p__Actinobacteria; c__Actinobacteria; o__Coriobacteriales; f__Coriobacteriaceae; g__Collinsella	0	0	0	0	0	0	0	0	0	0	0	0	0	0	0	0	0	0	224	0	0	0	64	0	0	0	1	0	0	0	0	0	0	0	0	0	0	0	0	0	0	0	0	0	0	0	0	0
OTU267	d__Bacteria; p__Actinobacteria; c__Actinobacteria; o__Coriobacteriales; f__Coriobacteriaceae; g__Collinsella	0	0	0	0	0	0	15	0	25	0	0	0	0	0	0	0	0	0	0	0	0	0	0	0	18	0	0	0	0	0	15	0	0	0	0	0	0	0	0	0	0	0	17	0	0	0	0	0
OTU527	d__Bacteria; p__Actinobacteria; c__Actinobacteria; o__Coriobacteriales; f__Coriobacteriaceae; g__Collinsella	0	0	0	0	0	0	0	0	0	0	0	0	0	0	0	0	0	0	0	0	0	0	1	0	0	1	0	0	0	1	0	0	0	0	0	0	0	0	0	0	0	1	0	6	0	0	0	0
OTU217	d__Bacteria; p__Actinobacteria; c__Actinobacteria; o__Coriobacteriales; f__Coriobacteriaceae	0	0	0	0	0	0	22	0	4	0	28	0	0	14	0	0	8	0	0	0	0	0	0	0	1	0	0	5	0	0	18	2	0	0	20	1	0	0	0	0	0	0	0	0	0	0	0	0
OTU270	d__Bacteria; p__Actinobacteria; c__Actinobacteria; o__Coriobacteriales; f__Coriobacteriaceae	6	0	0	1	0	0	16	10	16	27	21	0	0	7	0	0	10	23	0	20	7	106	0	1	0	9	0	10	0	0	22	1	30	0	4	0	0	0	1	0	0	11	6	0	5	0	5	11
OTU398	d__Bacteria; p__Actinobacteria; c__Actinobacteria; o__Coriobacteriales; f__Coriobacteriaceae	0	0	0	0	2	0	0	0	0	0	3	0	0	1	2	0	0	0	0	0	0	0	0	0	0	0	0	0	0	16	0	0	0	0	0	0	0	0	0	0	7	0	0	0	0	0	0	8
OTU453	d__Bacteria; p__Actinobacteria; c__Actinobacteria; o__Coriobacteriales; f__Coriobacteriaceae	1	0	0	0	0	0	0	0	3	0	0	0	0	0	0	0	2	0	1	2	0	0	0	0	0	2	0	1	0	2	1	0	2	0	0	0	0	0	0	0	1	0	1	0	2	0	0	0
OTU505	d__Bacteria; p__Actinobacteria; c__Actinobacteria; o__Coriobacteriales; f__Coriobacteriaceae	0	0	0	0	0	0	18	0	0	0	0	0	0	0	0	0	0	0	0	0	4	0	0	0	2	0	0	0	0	0	11	0	0	0	0	3	0	0	0	0	0	0	0	0	0	0	5	0
OTU538	d__Bacteria; p__Actinobacteria; c__Actinobacteria; o__Coriobacteriales; f__Coriobacteriaceae	0	0	0	0	0	0	0	0	0	0	0	0	0	0	0	0	0	0	0	0	0	0	0	0	0	0	0	0	0	0	0	0	0	0	0	0	0	0	0	0	0	0	0	0	0	0	0	0
OTU20	d__Bacteria; p__Actinobacteria; c__Actinobacteria; o__Bifidobacteriales; f__Bifidobacteriaceae; g__Bifidobacterium	8	0	0	28	0	0	393	3	435	14	28	0	132	561	1	95	0	153	303	0	2	137	721	8	3	40	5	0	0	1469	65	89	37	0	1347	2	1	0	39	81	0	403	1388	0	5	0	15	275
OTU46	d__Bacteria; p__Actinobacteria; c__Actinobacteria; o__Bifidobacteriales; f__Bifidobacteriaceae; g__Bifidobacterium	10	1	0	77	7	0	101	20	117	79	0	0	31	228	530	254	0	17	102	0	29	123	676	2	0	55	2	11	919	83	21	6	24	1	0	0	0	0	24	213	11	344	84	0	1	1	0	543
OTU261	d__Bacteria; p__Actinobacteria; c__Actinobacteria; o__Bifidobacteriales; f__Bifidobacteriaceae; g__Bifidobacterium	0	0	1	29	0	0	50	0	63	3	9	0	15	76	0	11	0	21	29	0	3	32	79	0	9	15	0	0	0	904	6	68	4	0	219	1	0	3	14	61	0	45	162	0	0	0	1	27
OTU280	d__Bacteria; p__Actinobacteria; c__Actinobacteria; o__Bifidobacteriales; f__Bifidobacteriaceae; g__Bifidobacterium	0	0	0	0	11	0	0	0	0	0	0	0	0	1	0	0	0	0	0	0	0	0	0	0	0	0	0	0	0	0	0	0	0	0	0	0	0	0	0	0	9	0	0	0	0	0	0	0
OTU308	d__Bacteria; p__Actinobacteria; c__Actinobacteria; o__Bifidobacteriales; f__Bifidobacteriaceae; g__Bifidobacterium	0	0	0	0	0	0	1	0	1	0	0	0	0	1	0	0	0	0	0	0	0	0	0	0	0	0	0	0	0	1	0	0	0	0	2	0	0	0	0	0	0	1	0	0	0	0	0	0
OTU591	d__Bacteria; p__Actinobacteria; c__Actinobacteria; o__Actinomycetales; f__Microbacteriaceae; g__Curtobacterium	0	0	0	0	0	0	0	0	0	0	0	0	0	0	0	0	0	0	0	0	0	0	0	0	0	0	0	0	0	0	0	0	0	0	0	0	0	0	0	0	0	0	0	0	0	0	0	0
OTU437	d__Bacteria; p__Actinobacteria; c__Actinobacteria; o__Actinomycetales; f__Corynebacteriaceae; g__Corynebacterium	0	0	0	0	0	0	0	0	0	0	0	0	17	0	0	0	0	0	0	0	0	0	0	0	0	2	0	0	0	0	0	0	0	0	0	0	0	0	0	0	0	0	0	0	0	1	1	0
OTU574	d__Bacteria; p__Actinobacteria; c__Actinobacteria; o__Actinomycetales; f__Actinomycetaceae; g__Actinomyces	0	3	14	1	4	0	1	0	0	1	0	3	1	1	2	0	0	1	11	0	1	3	0	0	0	1	0	1	11	0	0	0	0	2	1	0	2	13	0	6	1	1	3	1	2	3	0	1
OTU375	d__Archaea; p__Euryarchaeota; c__Methanobacteria; o__Methanobacteriales; f__Methanobacteriaceae; g__Methanobrevibacter	0	0	0	0	0	0	0	0	0	0	0	0	1	0	0	0	0	0	0	0	4	0	0	2	23	1	0	0	0	0	0	1	0	0	3	29	0	0	0	0	0	0	0	0	0	0	0	0
[truncated: 103 more columns]

## Sheet: alpha_rarefac.summary
SUPPLEMENTARY DATASET S1_ B The species-level OTUs and species richness and diversity estimates were obtained for each microbiome.
sample	reads	label	ace	chao	shannon	simpson	coverage	observed_otus
HC_1	20775	0.97	211.256	203.143	3.12527	0.105325	0.998412	178
HC_10	25327	0.97	181.733	186.462	2.84934	0.154939	0.999092	167
HC_11	19386	0.97	135.493	141.667	3.08204	0.075579	0.998865	116
HC_12	34925	0.97	210.515	230.583	3.14193	0.089051	0.998998	181
HC_13	31589	0.97	261.57	264.875	3.61792	0.061007	0.998765	234
HC_14	33150	0.97	194.527	205.364	3.20571	0.100669	0.999155	171
HC_15	32899	0.97	238.42	239.688	3.85886	0.04422	0.999422	229
HC_16	29633	0.97	237.575	258.545	3.56153	0.062727	0.998988	219
HC_17	36789	0.97	279.515	277.217	3.71589	0.067934	0.99894	245
HC_18	34184	0.97	254.13	297	3.77361	0.048955	0.998918	223
HC_19	35737	0.97	305.885	296.84	3.52732	0.085578	0.998769	259
HC_2	26614	0.97	210.633	209.938	3.44151	0.088436	0.998985	188
HC_20	34157	0.97	320.241	320	2.68281	0.183363	0.99798	251
HC_21	36748	0.97	272.455	273.045	3.37421	0.086111	0.999048	246
HC_22	29390	0.97	232.502	232.647	3.91419	0.03895	0.999081	212
HC_23	40905	0.97	139.403	142.091	2.44128	0.170272	0.999487	123
HC_24	31340	0.97	276.473	279.882	4.02702	0.03532	0.999075	256
HC_25	20921	0.97	198.241	196.625	3.54008	0.056505	0.998662	173
HC_26	36313	0.97	198.347	196.214	3.32145	0.066615	0.999146	163
HC_27	29937	0.97	280.558	285.789	3.52885	0.064331	0.99853	236
HC_28	35556	0.97	270.469	293.5	2.98869	0.101915	0.998622	220
HC_29	40290	0.97	239.404	249.067	3.85532	0.039113	0.999206	216
HC_3	26312	0.97	163.51	172.111	2.96433	0.137889	0.999126	144
HC_30	32047	0.97	217.957	220.375	3.24561	0.085036	0.999095	195
HC_31	33886	0.97	305.184	308.75	3.67745	0.087021	0.999115	287
HC_32	37612	0.97	285.717	279.6	3.55355	0.069515	0.998804	240
HC_33	32579	0.97	177.131	176.118	2.60668	0.185175	0.999202	157
HC_34	30068	0.97	326.913	352.4	4.15485	0.034234	0.998603	295
HC_35	39353	0.97	137.736	155	3.08748	0.101673	0.999593	125
HC_36	32735	0.97	241.967	275.6	3.60059	0.067591	0.99887	209
HC_37	25033	0.97	271.862	277.167	3.78147	0.058405	0.998442	236
HC_38	43760	0.97	270.228	275.105	3.11864	0.120835	0.999269	249
HC_39	42406	0.97	205.449	205.353	3.04717	0.115733	0.999505	193
HC_4	35938	0.97	172.29	147.25	2.29546	0.261565	0.999165	111
HC_40	29467	0.97	292.141	290.731	3.57844	0.066463	0.998541	256
HC_41	36720	0.97	296.527	296	3.95934	0.04177	0.999101	272
HC_42	45857	0.97	156.41	151.273	3.42462	0.059094	0.999695	143
HC_43	32156	0.97	168.673	149.083	3.0768	0.07708	0.999191	122
HC_44	34781	0.97	155.79	188	2.03107	0.23742	0.999051	122
HC_45	43525	0.97	201.921	203.588	3.18914	0.083282	0.999495	190
HC_46	37637	0.97	253.857	254.455	3.57229	0.064591	0.999229	236
HC_47	37371	0.97	247.185	251.176	3.63428	0.057399	0.999144	222
HC_48	22096	0.97	219.932	229.429	3.43843	0.069986	0.998552	194
HC_49	27180	0.97	143.735	133.667	2.99655	0.073113	0.999117	103
HC_5	24569	0.97	219.646	213.957	3.4214	0.067429	0.998494	185
HC_50	21921	0.97	209.387	185	2.88096	0.118319	0.998358	140
HC_51	22344	0.97	322.955	323.44	3.794	0.055385	0.997359	255
HC_52	13967	0.97	266.258	256.812	4.00308	0.038534	0.997351	236
HC_53	20837	0.97	169.426	191.143	3.57061	0.047682	0.998896	155
HC_54	22345	0.97	206.043	181.75	2.04589	0.282821	0.998389	103
HC_55	19522	0.97	206.632	217.5	3.22212	0.115861	0.998207	175
HC_56	30632	0.97	166.979	159	2.25845	0.214883	0.999119	120
HC_57	30147	0.97	207.884	169.615	2.24968	0.217082	0.998905	129
HC_58	19212	0.97	233.279	230.565	3.36546	0.1025	0.998334	209
HC_59	23865	0.97	152.749	126.857	2.51754	0.154408	0.998952	84
HC_6	16116	0.97	214.557	225	3.10074	0.102734	0.997766	183
HC_60	44666	0.97	249.168	233.667	2.53674	0.206465	0.999082	179
HC_61	26074	0.97	255.007	270.714	3.76093	0.049055	0.998466	215
HC_7	21157	0.97	216.602	223	3.12009	0.097686	0.998251	186
HC_8	17718	0.97	253.55	253.136	4.11433	0.031154	0.99825	232
HC_9	21694	0.97	216.738	202.375	3.51574	0.055247	0.998433	179
LT_A1	54283	0.97	280.941	305.067	3.27234	0.093629	0.999189	242
LT_A10	23035	0.97	200.02	198.316	3.78999	0.039459	0.999002	185
LT_A11	25484	0.97	159.935	150.8	3.00722	0.110596	0.999058	137
LT_A12	22190	0.97	191.234	171	2.88056	0.142213	0.998648	142
LT_A13	40652	0.97	204.312	214.077	3.3896	0.073162	0.999311	185
LT_A14	22452	0.97	237.452	124.375	1.55356	0.400169	0.998664	70
LT_A15	20026	0.97	214.123	219	3.64088	0.049873	0.998502	190
LT_A16	36530	0.97	258.058	245	3.11006	0.076029	0.998796	159
LT_A17	30523	0.97	175.434	176.429	2.91151	0.118773	0.999181	155
LT_A18	38085	0.97	192.463	143.375	3.03369	0.078587	0.999239	118
LT_A19	30019	0.97	123.4	124	2.97564	0.074355	0.999367	105
LT_A2	40532	0.97	219.331	211.375	2.92583	0.144216	0.999235	192
LT_A20	28654	0.97	156.811	126.091	2.71922	0.139832	0.999162	101
LT_A21	30293	0.97	207.286	191.714	2.95477	0.080214	0.99868	136
LT_A22	26740	0.97	247.595	240.5	3.72222	0.046747	0.998654	209
LT_A23	50354	0.97	207.465	212	3.0835	0.088216	0.999285	167
LT_A24	21308	0.97	134.832	119.1	2.29429	0.26444	0.998968	96
LT_A25	18782	0.97	180.029	181	3.25963	0.09162	0.998562	154
LT_A26	25121	0.97	176.624	168.833	2.71434	0.130264	0.998766	143
LT_A27	37861	0.97	211.389	215	2.79861	0.166236	0.999208	186
LT_A28	47984	0.97	240.411	247.714	3.48141	0.064866	0.999312	210
LT_A29	25191	0.97	119.807	119.3	2.49978	0.128973	0.999087	94
LT_A3	26368	0.97	259.324	255.462	2.88031	0.169803	0.998369	186
LT_A30	44357	0.97	121.625	115.083	2.94528	0.081882	0.999481	94
LT_A31	32810	0.97	175.518	169.556	3.09194	0.087532	0.999025	142
LT_A32	29850	0.97	243.111	243.25	3.67625	0.064592	0.999129	227
LT_A33	25917	0.97	154.218	148.667	2.64641	0.154004	0.999035	132
LT_A34	59020	0.97	143.854	140.5	2.73665	0.121993	0.999627	124
LT_A35	28664	0.97	220.171	217.636	3.1412	0.109076	0.999128	204
LT_A36	23175	0.97	222.272	180.64	2.75076	0.113979	0.998317	151
LT_A37	35702	0.97	156.255	159.1	3.17136	0.091757	0.999468	142
LT_A38	30702	0.97	253.826	234.438	3.4519	0.049664	0.998599	178
LT_A39	33138	0.97	179.296	170.04	2.33137	0.203989	0.999185	156
LT_A4	34514	0.97	213.095	172	2.72059	0.093778	0.998957	102
LT_A40	34580	0.97	263.897	241.4	3.38159	0.070785	0.998872	192
LT_A41	22919	0.97	148.777	137.5	2.89575	0.094544	0.998909	100
LT_A42	22639	0.97	156.098	153.875	3.16641	0.079527	0.999117	142
LT_A5	29146	0.97	168.76	137.091	2.89094	0.107727	0.999177	112
LT_A6	19455	0.97	190.664	189.4	3.36536	0.096351	0.998612	166
LT_A7	29363	0.97	185.27	165.833	2.91985	0.117493	0.999012	132
LT_A8	30494	0.97	164.096	154.625	3.00759	0.089563	0.999147	114
LT_A9	42324	0.97	184.808	186.067	3.27898	0.059569	0.999244	153
LT_N1	20539	0.97	151.89	127.083	2.62063	0.135238	0.998734	100
LT_N10	23753	0.97	276.696	217.462	2.74217	0.107089	0.997937	127
LT_N11	39425	0.97	293.82	296.391	4.0605	0.032727	0.999087	269
LT_N12	25673	0.97	223.28	164.353	3.19494	0.083859	0.998793	137
LT_N13	29796	0.97	244.319	244.526	3.25048	0.098764	0.998557	197
LT_N14	25924	0.97	286.925	296.105	3.64961	0.054087	0.998264	244
LT_N15	45285	0.97	164.317	177	3.43728	0.061221	0.999536	147
LT_N16	18293	0.97	206.281	208.526	2.70888	0.15917	0.998141	179
LT_N17	34546	0.97	222.517	247.75	2.89797	0.117953	0.998784	176
LT_N18	22996	0.97	253.32	264.938	3.99883	0.032878	0.998348	221
LT_N19	43039	0.97	194.445	193	2.46181	0.181004	0.999187	158
LT_N2	44171	0.97	285.054	281.12	4.00836	0.030555	0.999253	260
LT_N20	36989	0.97	182.012	167.769	2.50554	0.162052	0.999162	132
LT_N21	61730	0.97	278.394	281.913	3.08149	0.120918	0.999352	248
LT_N22	9249	0.97	237.729	231.091	3.86325	0.038953	0.996108	212
LT_N23	30270	0.97	304.637	318.05	3.93619	0.040006	0.998612	275
LT_N24	43230	0.97	239.198	233.143	3.72134	0.051573	0.999283	211
LT_N25	22795	0.97	384.336	403.667	3.61693	0.063719	0.996622	315
LT_N26	21880	0.97	245.845	203.364	2.09218	0.27483	0.998218	136
LT_N27	35905	0.97	223.653	217.056	3.3999	0.064771	0.999025	184
LT_N28	22850	0.97	227.877	228.526	3.6065	0.058086	0.998512	199
LT_N29	22565	0.97	272.419	259.588	3.03989	0.101988	0.997917	196
LT_N3	64050	0.97	267.166	268.5	3.19814	0.085686	0.999438	237
LT_N30	31324	0.97	226.819	214.545	3.04904	0.077602	0.998691	140
LT_N31	34920	0.97	348.565	244.1	3.34194	0.055573	0.998654	136
LT_N32	34761	0.97	181.066	155.364	2.77917	0.114195	0.999194	121
LT_N33	35063	0.97	302.662	264.2	3.51071	0.072235	0.998774	204
LT_N34	26944	0.97	173.571	138	3.07645	0.064593	0.998961	111
LT_N35	18895	0.97	226.06	254.25	3.188	0.089948	0.997724	179
LT_N36	22705	0.97	291.388	280.405	3.99918	0.036808	0.998591	267
LT_N37	17723	0.97	129.045	131.333	3.07157	0.087149	0.999097	118
LT_N38	21380	0.97	234.371	257.091	3.61582	0.080469	0.998503	212
LT_N39	26389	0.97	164.386	167.3	3.03449	0.116624	0.999128	142
LT_N4	28656	0.97	178.745	189.333	3.14203	0.095317	0.999267	166
LT_N40	54865	0.97	257.95	255.636	3.73139	0.042984	0.999344	227
LT_N41	44117	0.97	265.829	272.167	3.56899	0.066945	0.999116	231
LT_N42	25863	0.97	140.251	149.5	1.66858	0.435813	0.998995	117
LT_N43	30684	0.97	201.843	218.111	3.44857	0.073523	0.999153	182
LT_N44	32629	0.97	214.625	220.667	3.17171	0.10482	0.998927	181
LT_N45	26313	0.97	190.234	187.556	3.32548	0.07143	0.99924	177
LT_N46	47974	0.97	171.896	182.6	3.08164	0.086216	0.999396	142
LT_N47	49106	0.97	215.139	222.083	3.00875	0.140638	0.999471	195
LT_N48	35958	0.97	193.365	175.077	3.28633	0.066784	0.999305	152
LT_N5	28022	0.97	195.827	200.5	2.63182	0.171832	0.998751	158
LT_N6	19691	0.97	193.776	185.111	2.86247	0.108301	0.998223	119
LT_N7	35536	0.97	138.187	126.5	2.21901	0.12867	0.99924	68
LT_N8	25466	0.97	305.091	302.75	3.84394	0.048909	0.998351	272
LT_N9	40653	0.97	215.982	240.667	3.46221	0.055695	0.999188	182
